# Supplementary material for: Rapid pathogen identification using a novel microarray-based assay with purulent meningitis in cerebrospinal fluid
Source: PubMed Central journal article supplement (PMC6206030; doi:10.1038/s41598-018-34051-0), 2018-10-29
Supplement: 41598_2018_34051_MOESM1_ESM.pdf [file 41598_2018_34051_MOESM1_ESM.pdf]

## Title Page

**Running title:** DNA microarray identified pathogens of Purulent meningitis

**Title:** Rapid pathogen identification using a novel microarray-based assay with Purulent meningitis in Cerebrospinal Fluid

**First Author and co-first author<sup>#</sup>:** Yuting Hou, Xu Zhang<sup>#</sup>

**Order of Authors:** Yuting Hou<sup>1,3</sup>, Xu Zhang<sup>2,#</sup>, Xiaolin Hou<sup>4</sup>, Ruofen Wu<sup>1,3</sup>, Yanbai Wang<sup>1,3</sup>, Xuexian He<sup>1,3</sup>, Libin Wang<sup>2</sup>, Zhenhai Wang<sup>1,3,4\*</sup>

**All Authors's affiliations:**

1 Department of Cerebrospinal Fluid Laboratory, The General Hospital of Ningxia Medical University, Yinchuan, Ningxia 750004, China

2 Department of Beijing National Biochip Research Center sub-center in Ningxia, General Hospital of Ningxia Medical University, Yinchuan, Ningxia 750004, China

3 Ningxia Key Laboratory of Cerebrocranial Diseases, Ningxia Medical University, Yinchuan, Ningxia 750004, China

4 Neurology Center, The General Hospital of Ningxia Medical University, Yinchuan, Ningxia 750004, China

**Corresponding Author:** Prof. Zhenhai Wang, M.D. Tel.: +86(0951)6744025

Fax: +86(0951)4082981; E-mail(for work): wangzhenhai1968@163.com

**Address:** Add. 804 Shengli Street, Xingqing Area, Yinchuan Ningxia, P.R.China

**Submit email:** xuzhang1012@163.com

**Manuscript Region of Origin:** CHINA

**Number of Words/Characters in abstract:** 194/1169.

**The contribution of each author for the project and production of the article:**

Zhenhai Wang: designed project, revised article, and coordinated all aspects of work.

Yuting Hou: participated in clinical experiment, steered chemotherapy and analyzed clinical material, wrote article of clinical part, Prepared figure 1.

Xu Zhang: designed genechip project, participated in genechip and molecular experiment, wrote article of genechip part, Prepared figure 2-4, table 3.

Xiaolin Hou: Designed and screened the probes, Tested the specificity and accuracy of probes, Prepared table 1-2.

Ruofen Wu: collected clinical cases, sorted the dates of clinical.

Yanbai Wang: Standard strains micromarry experiment, DNA Extraction.

Xuexian He: analyzed molecular material, prepared reagent and instrument.

Libin Wang: Optimized the conditions and parameters of microarray preparation.

**Acknowledgements:** This study was funded by the National Natural Science Foundation of China (No. 31660030,81160151) . This work does not directly or indirectly have any formal relationships with business groups.

Specimen 1 ( genechip )

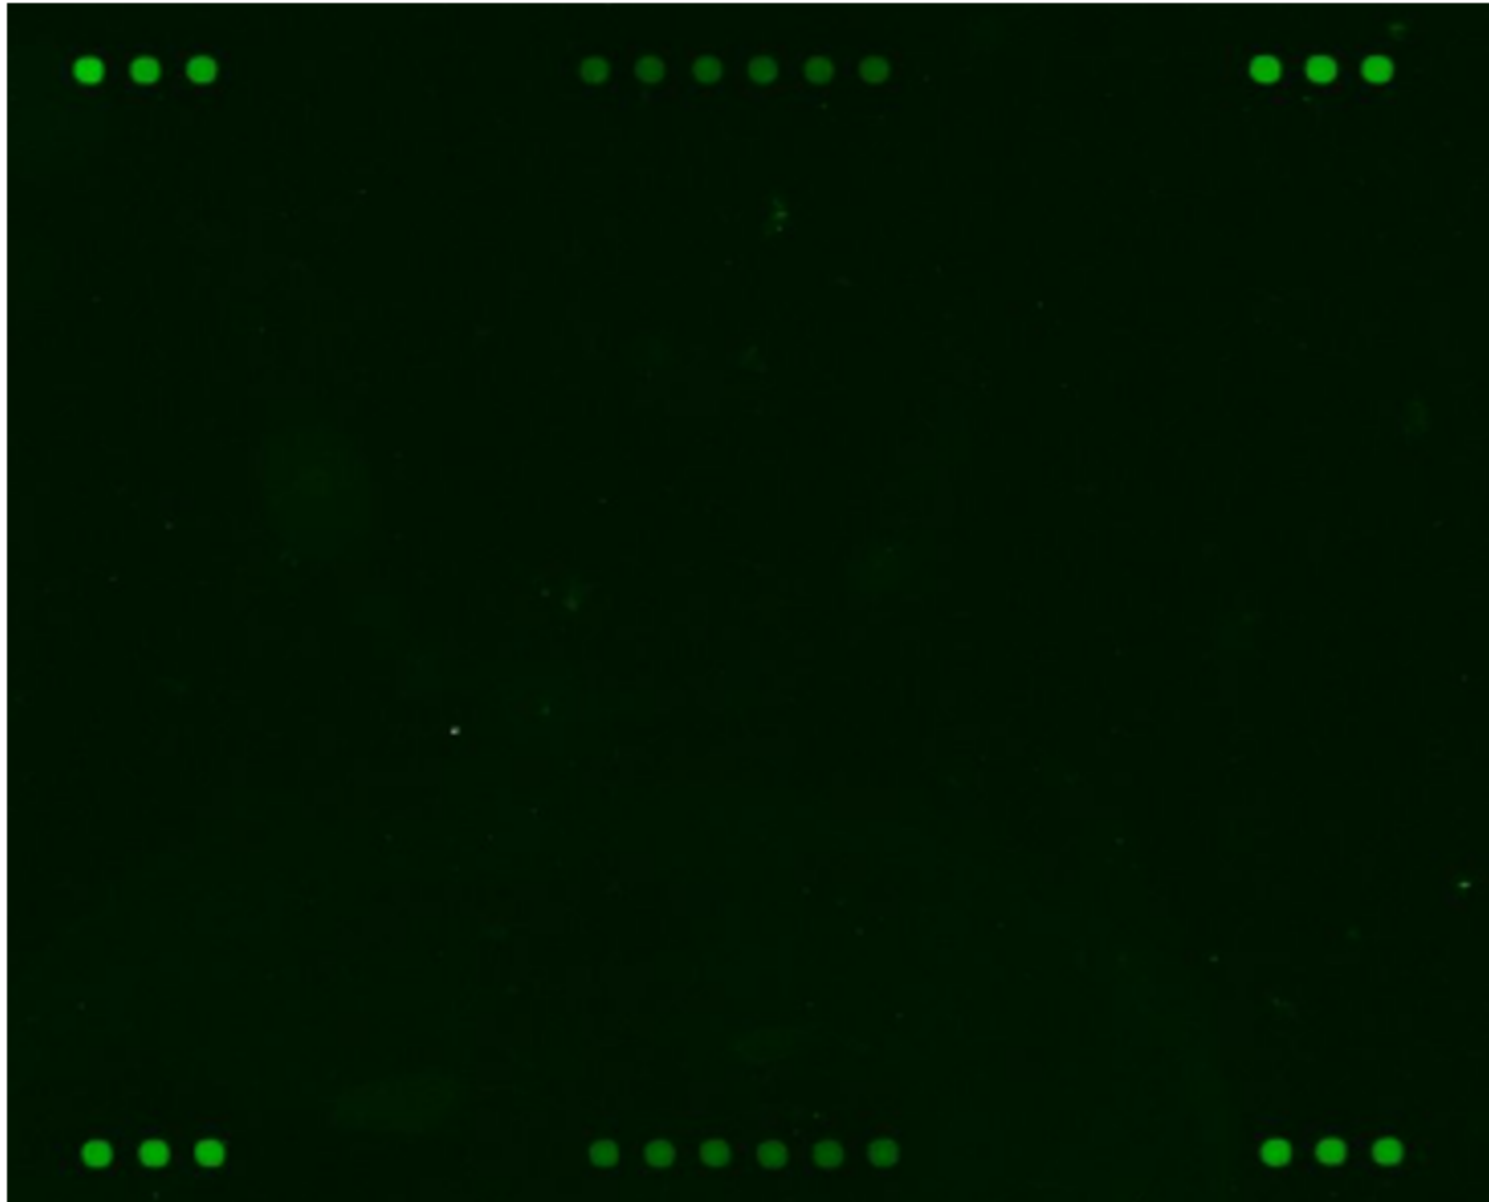

Specimen 2 ( genechip )

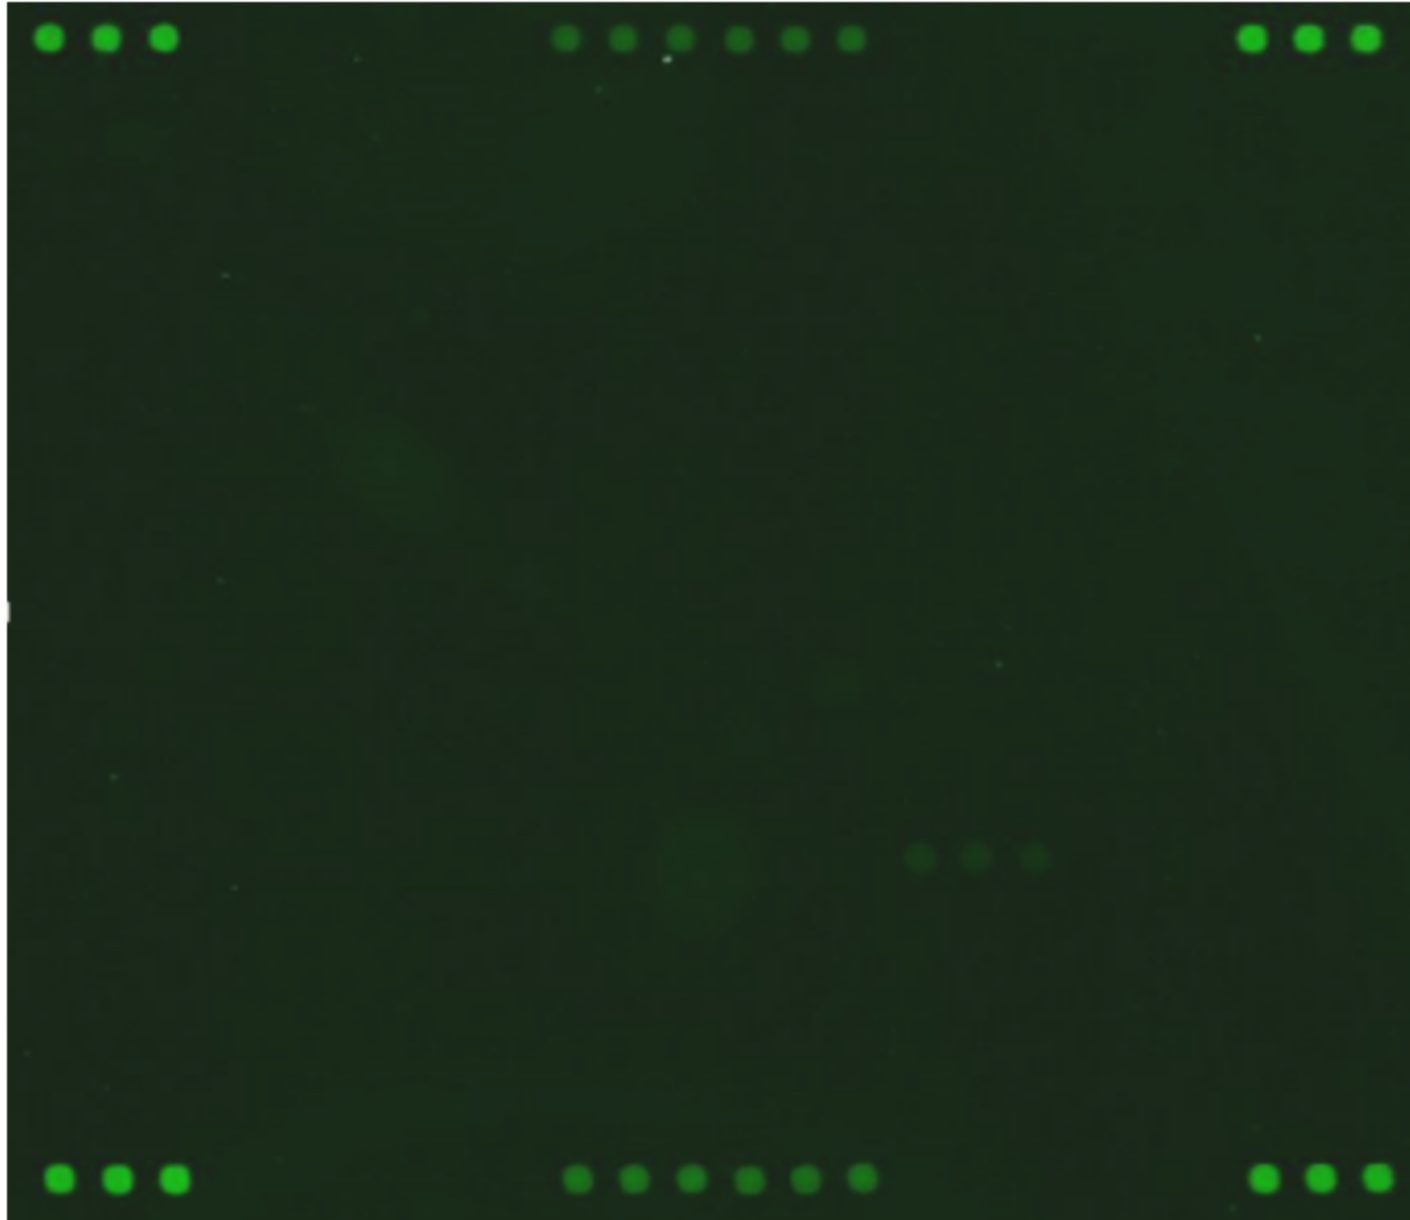

Specimen 3 ( genechip )

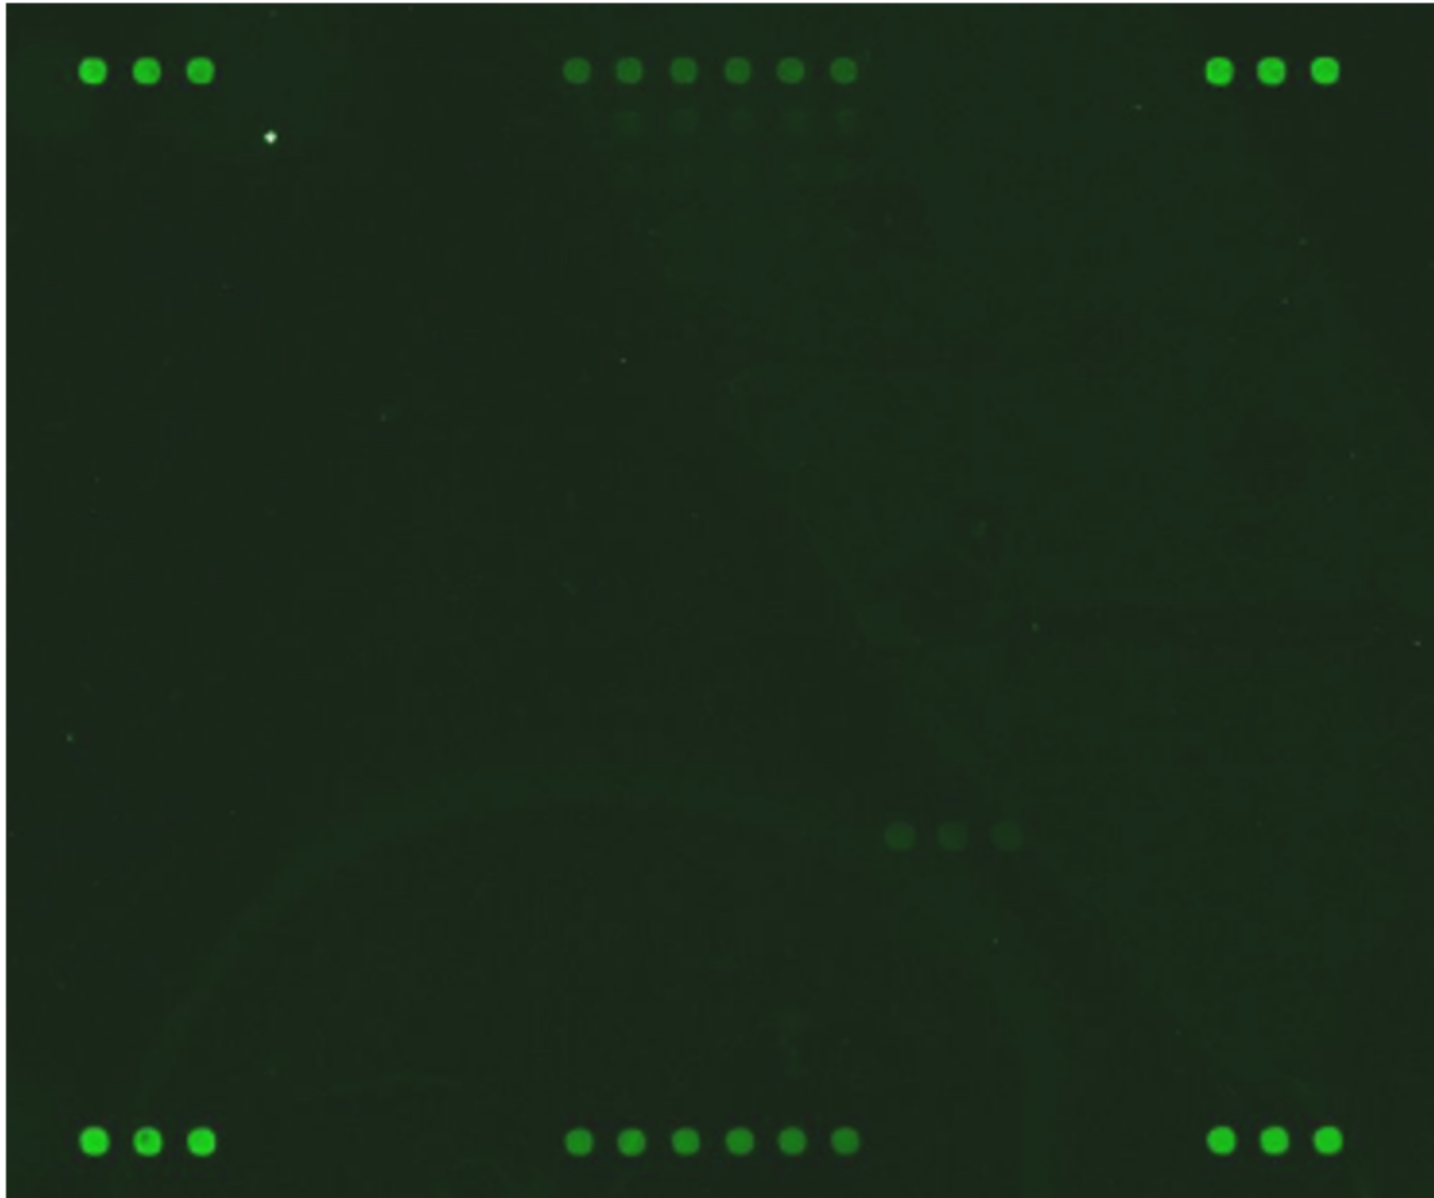



Specimen 4 (genechip)

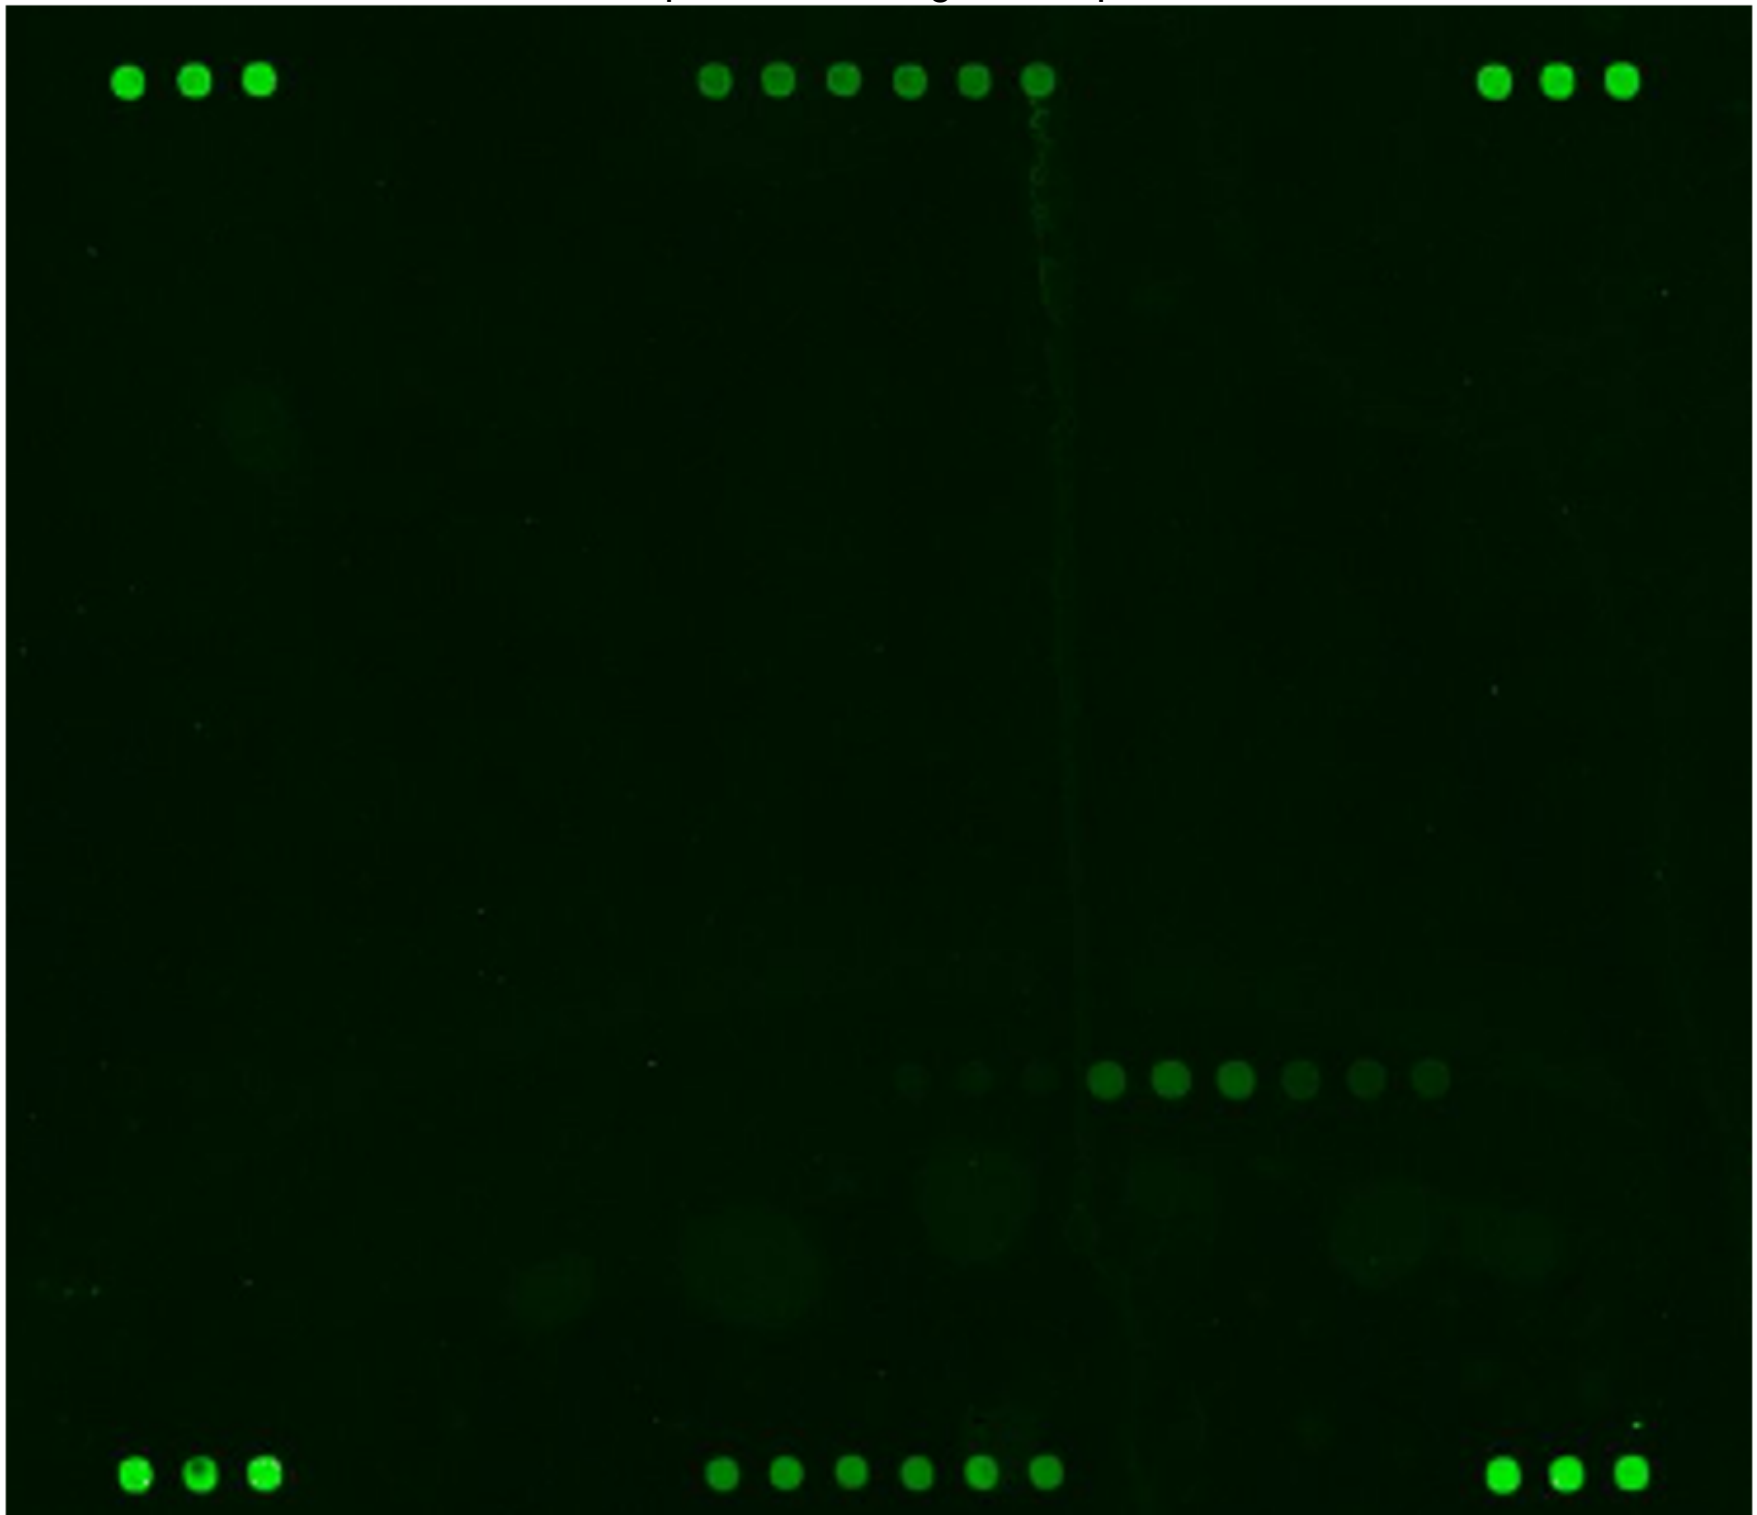

Specimen 5 (genechip)

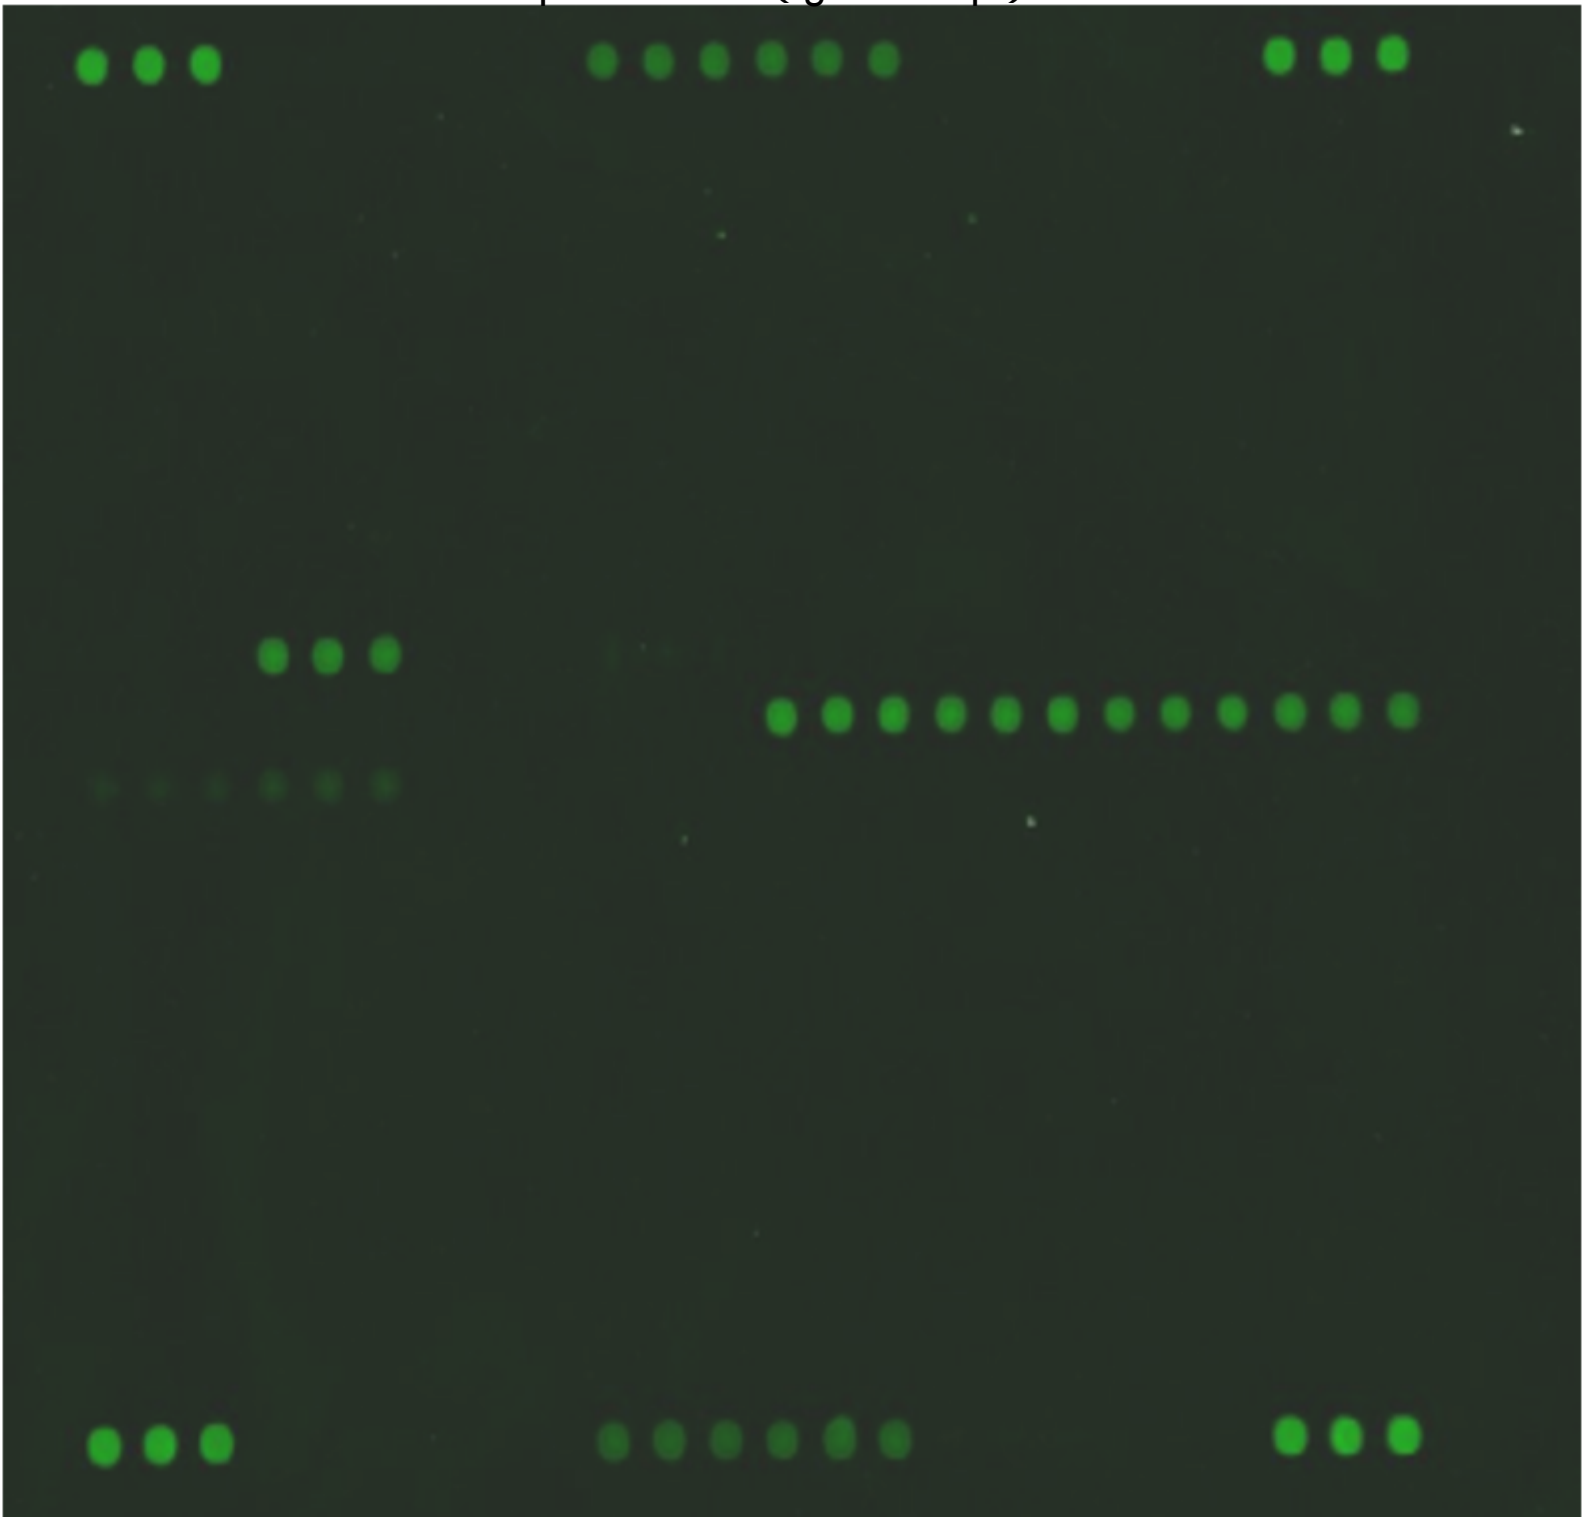





Specimen 8 ( genechip )

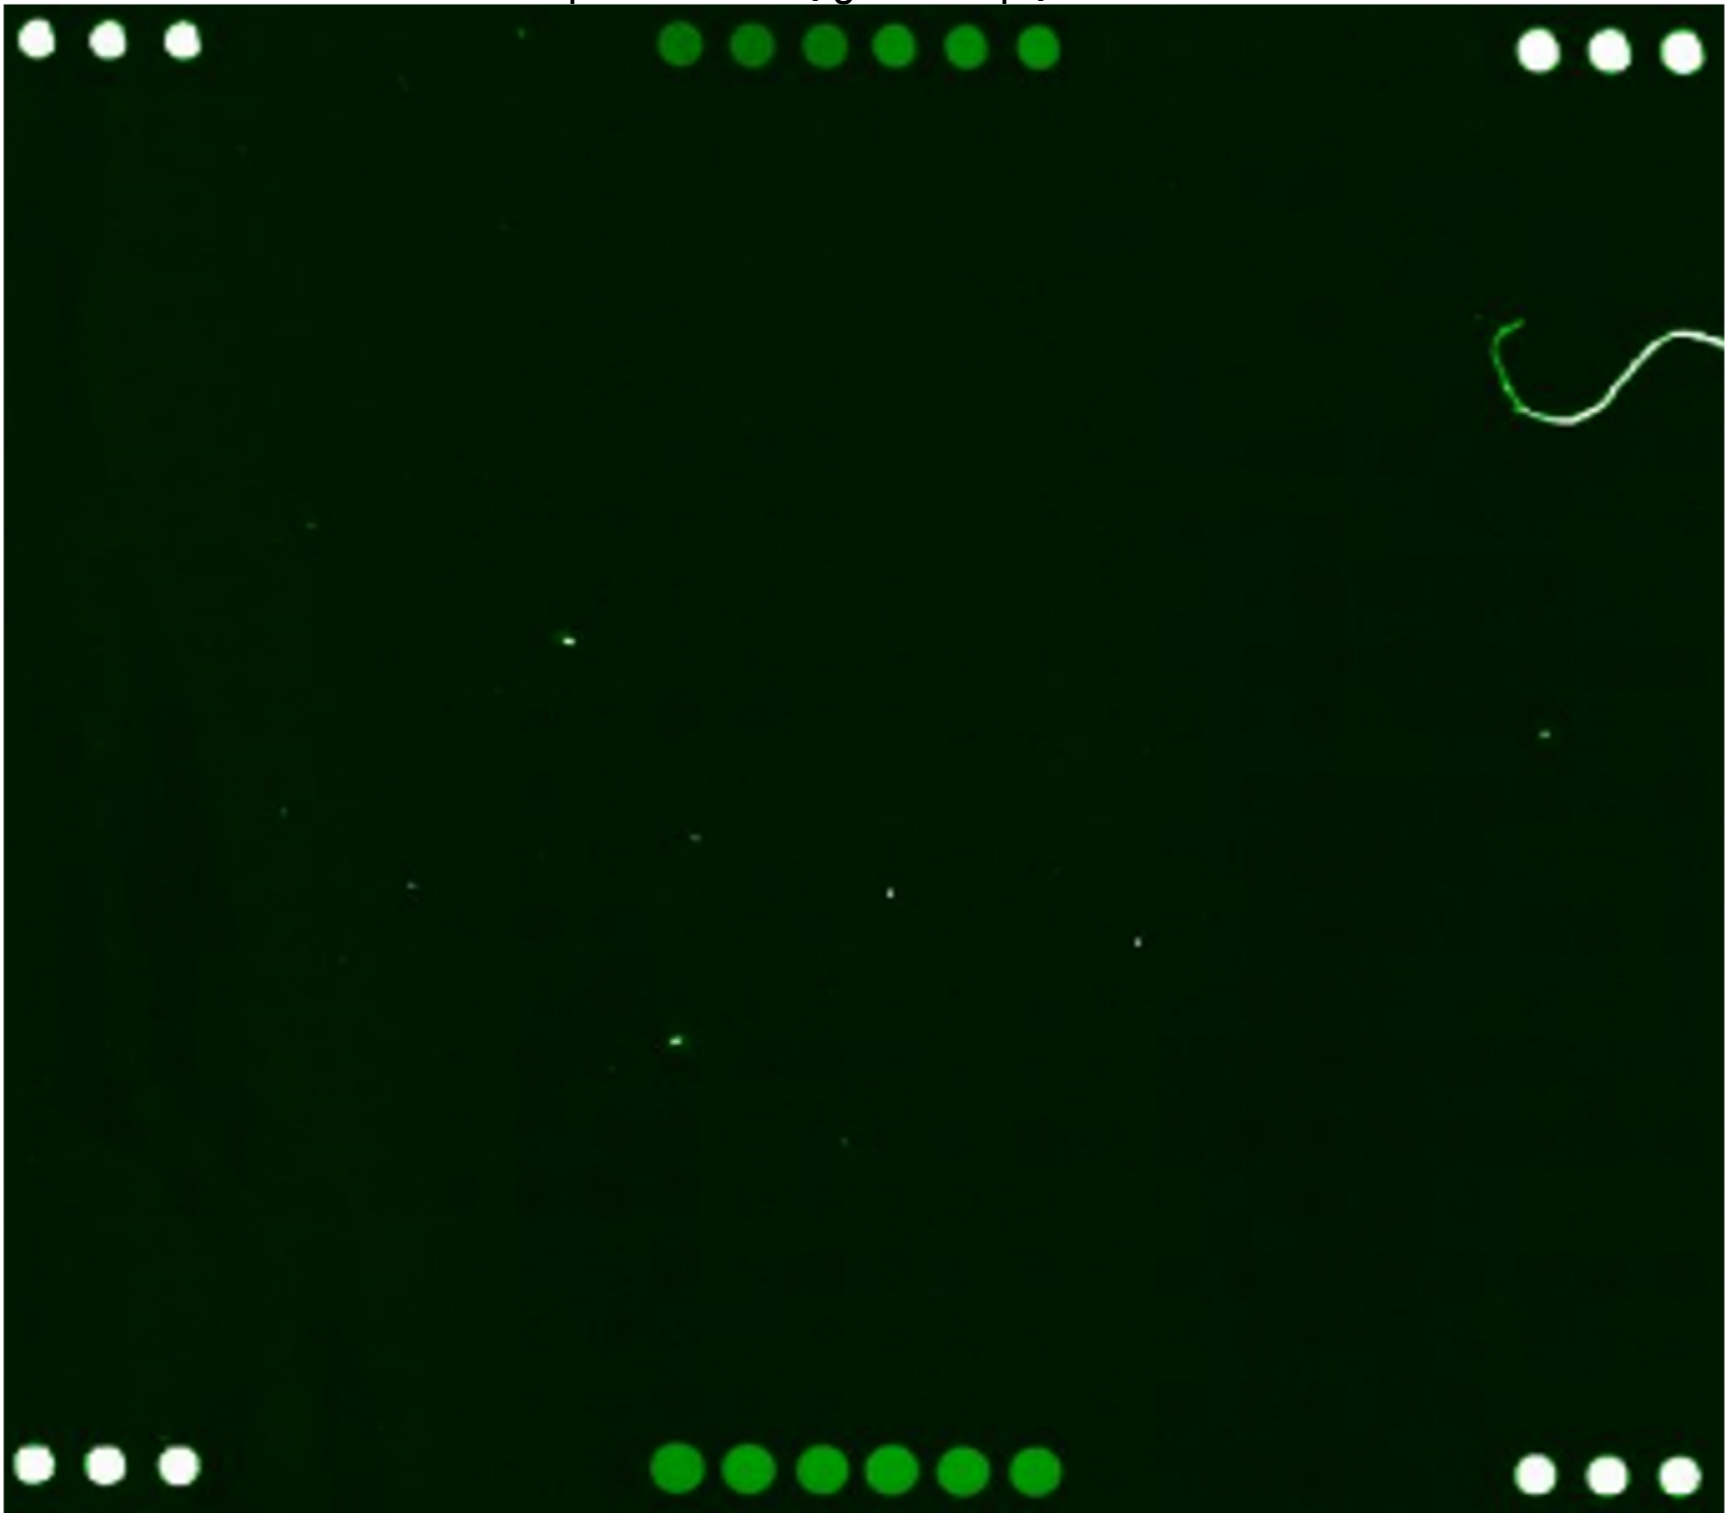

Specimen 9 ( genechip )

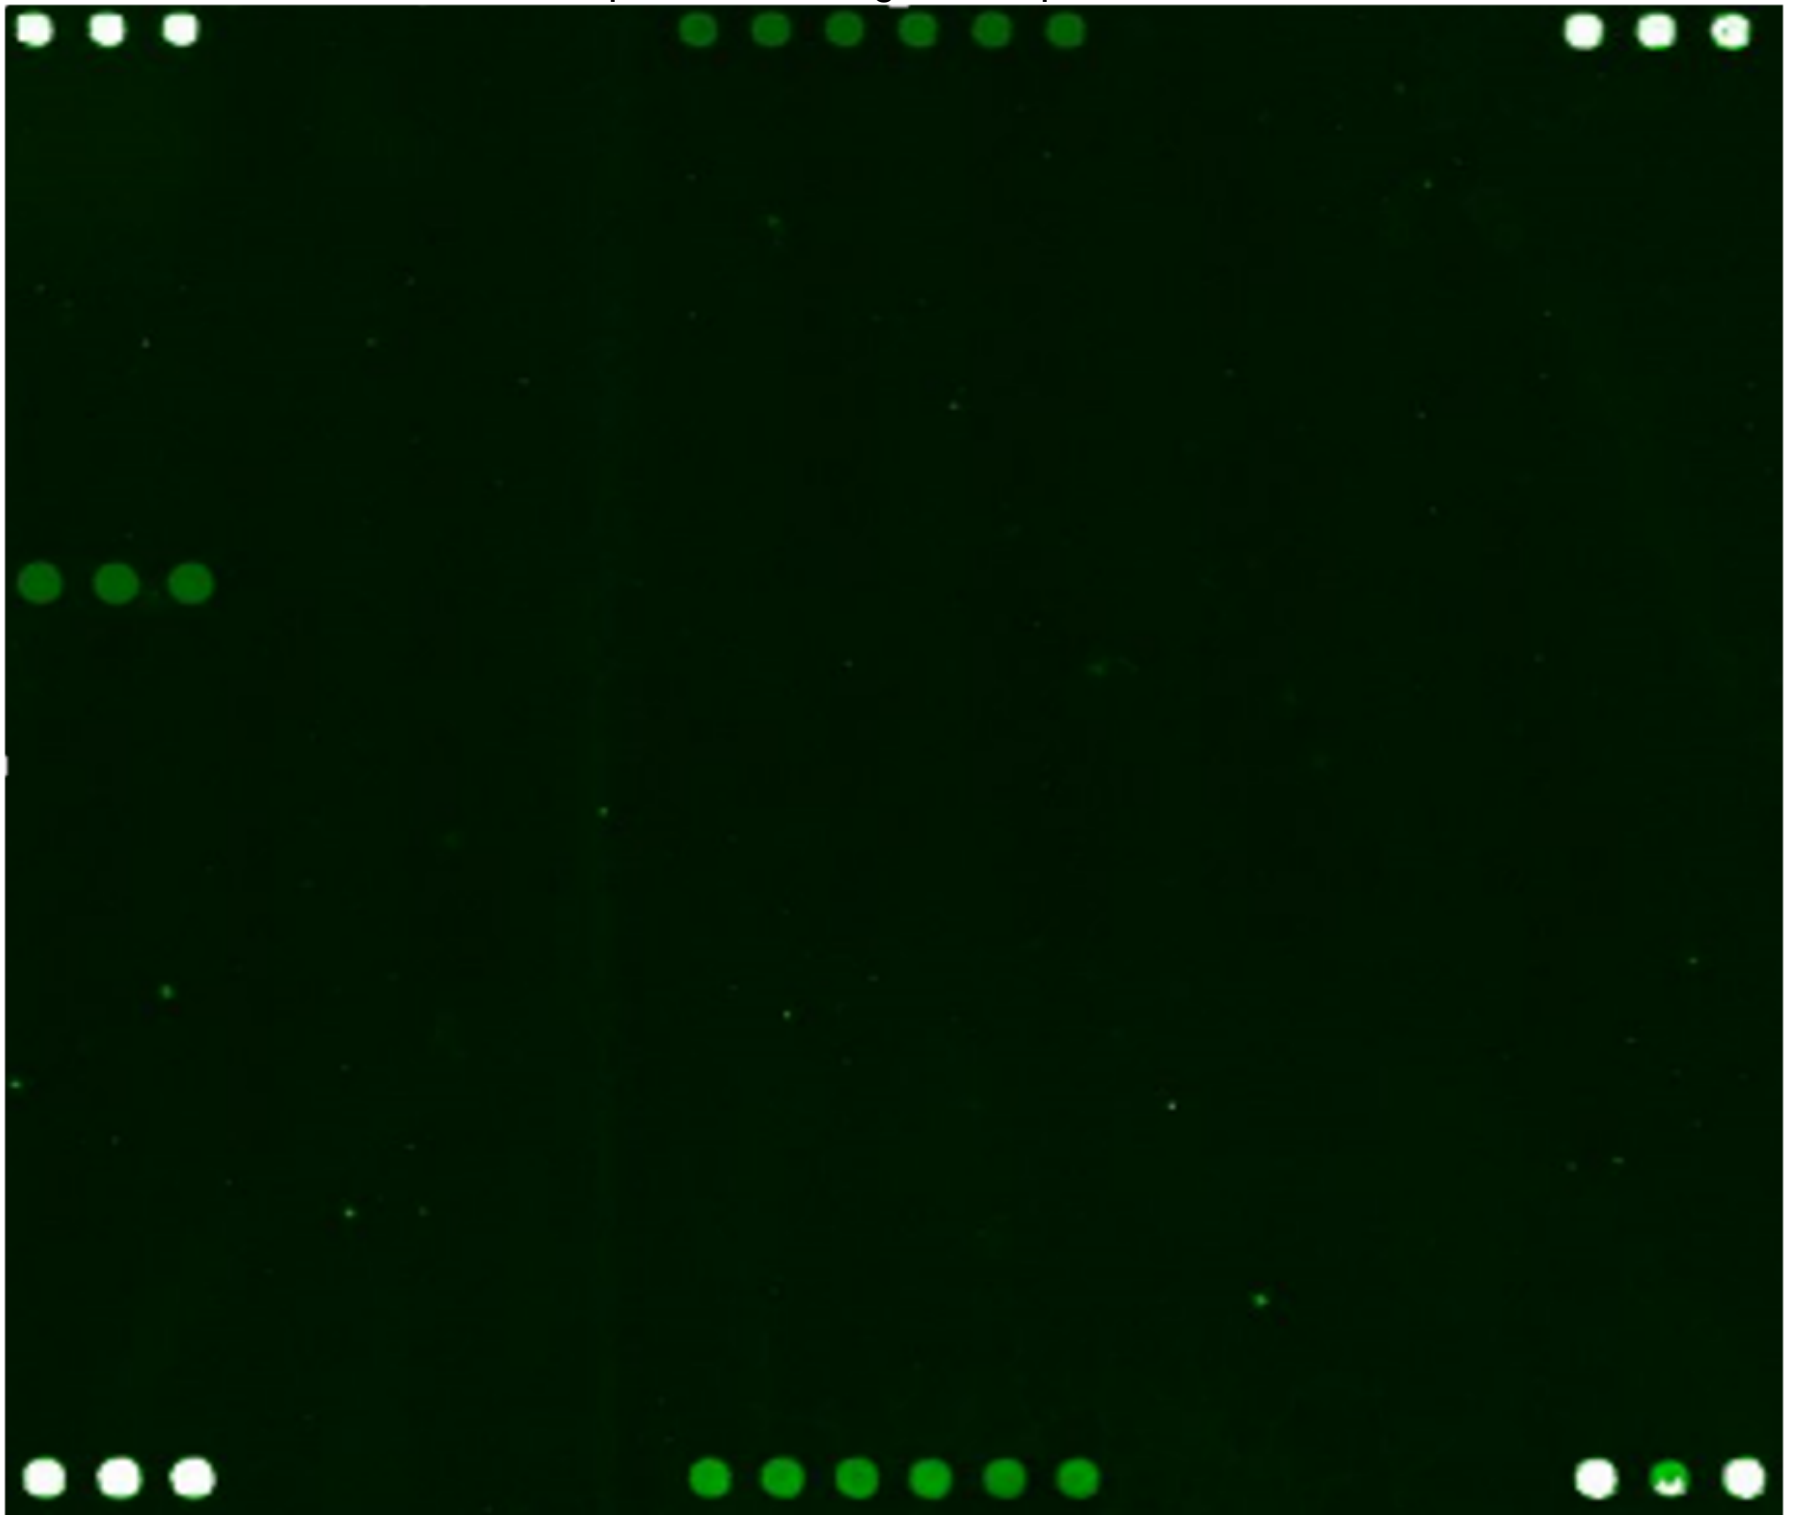

Specimen 10 ( genechip )

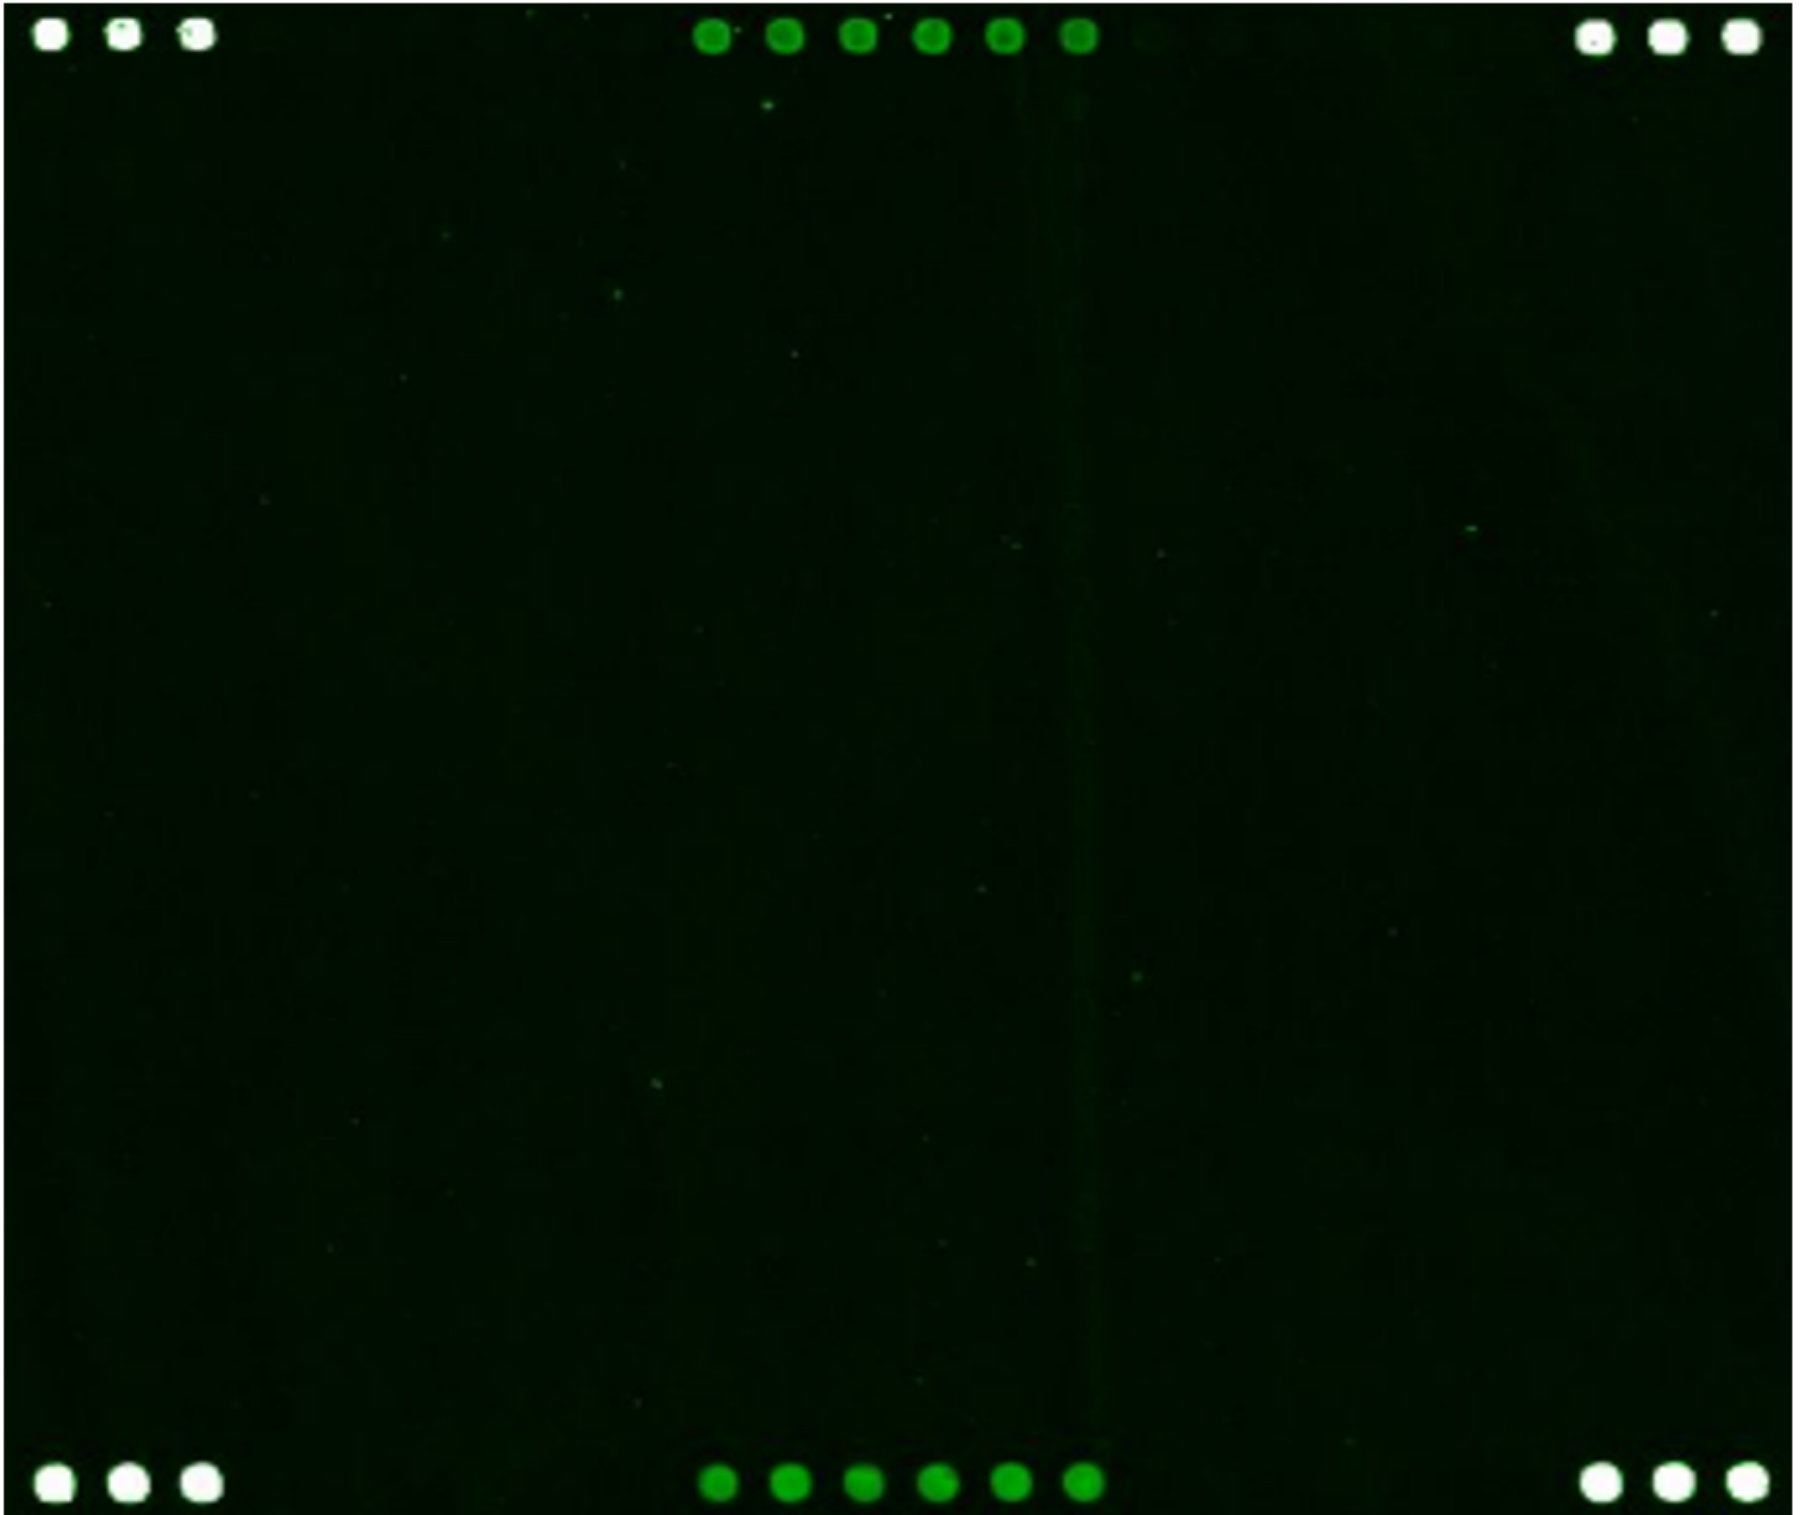

Specimen 11 ( genechip )

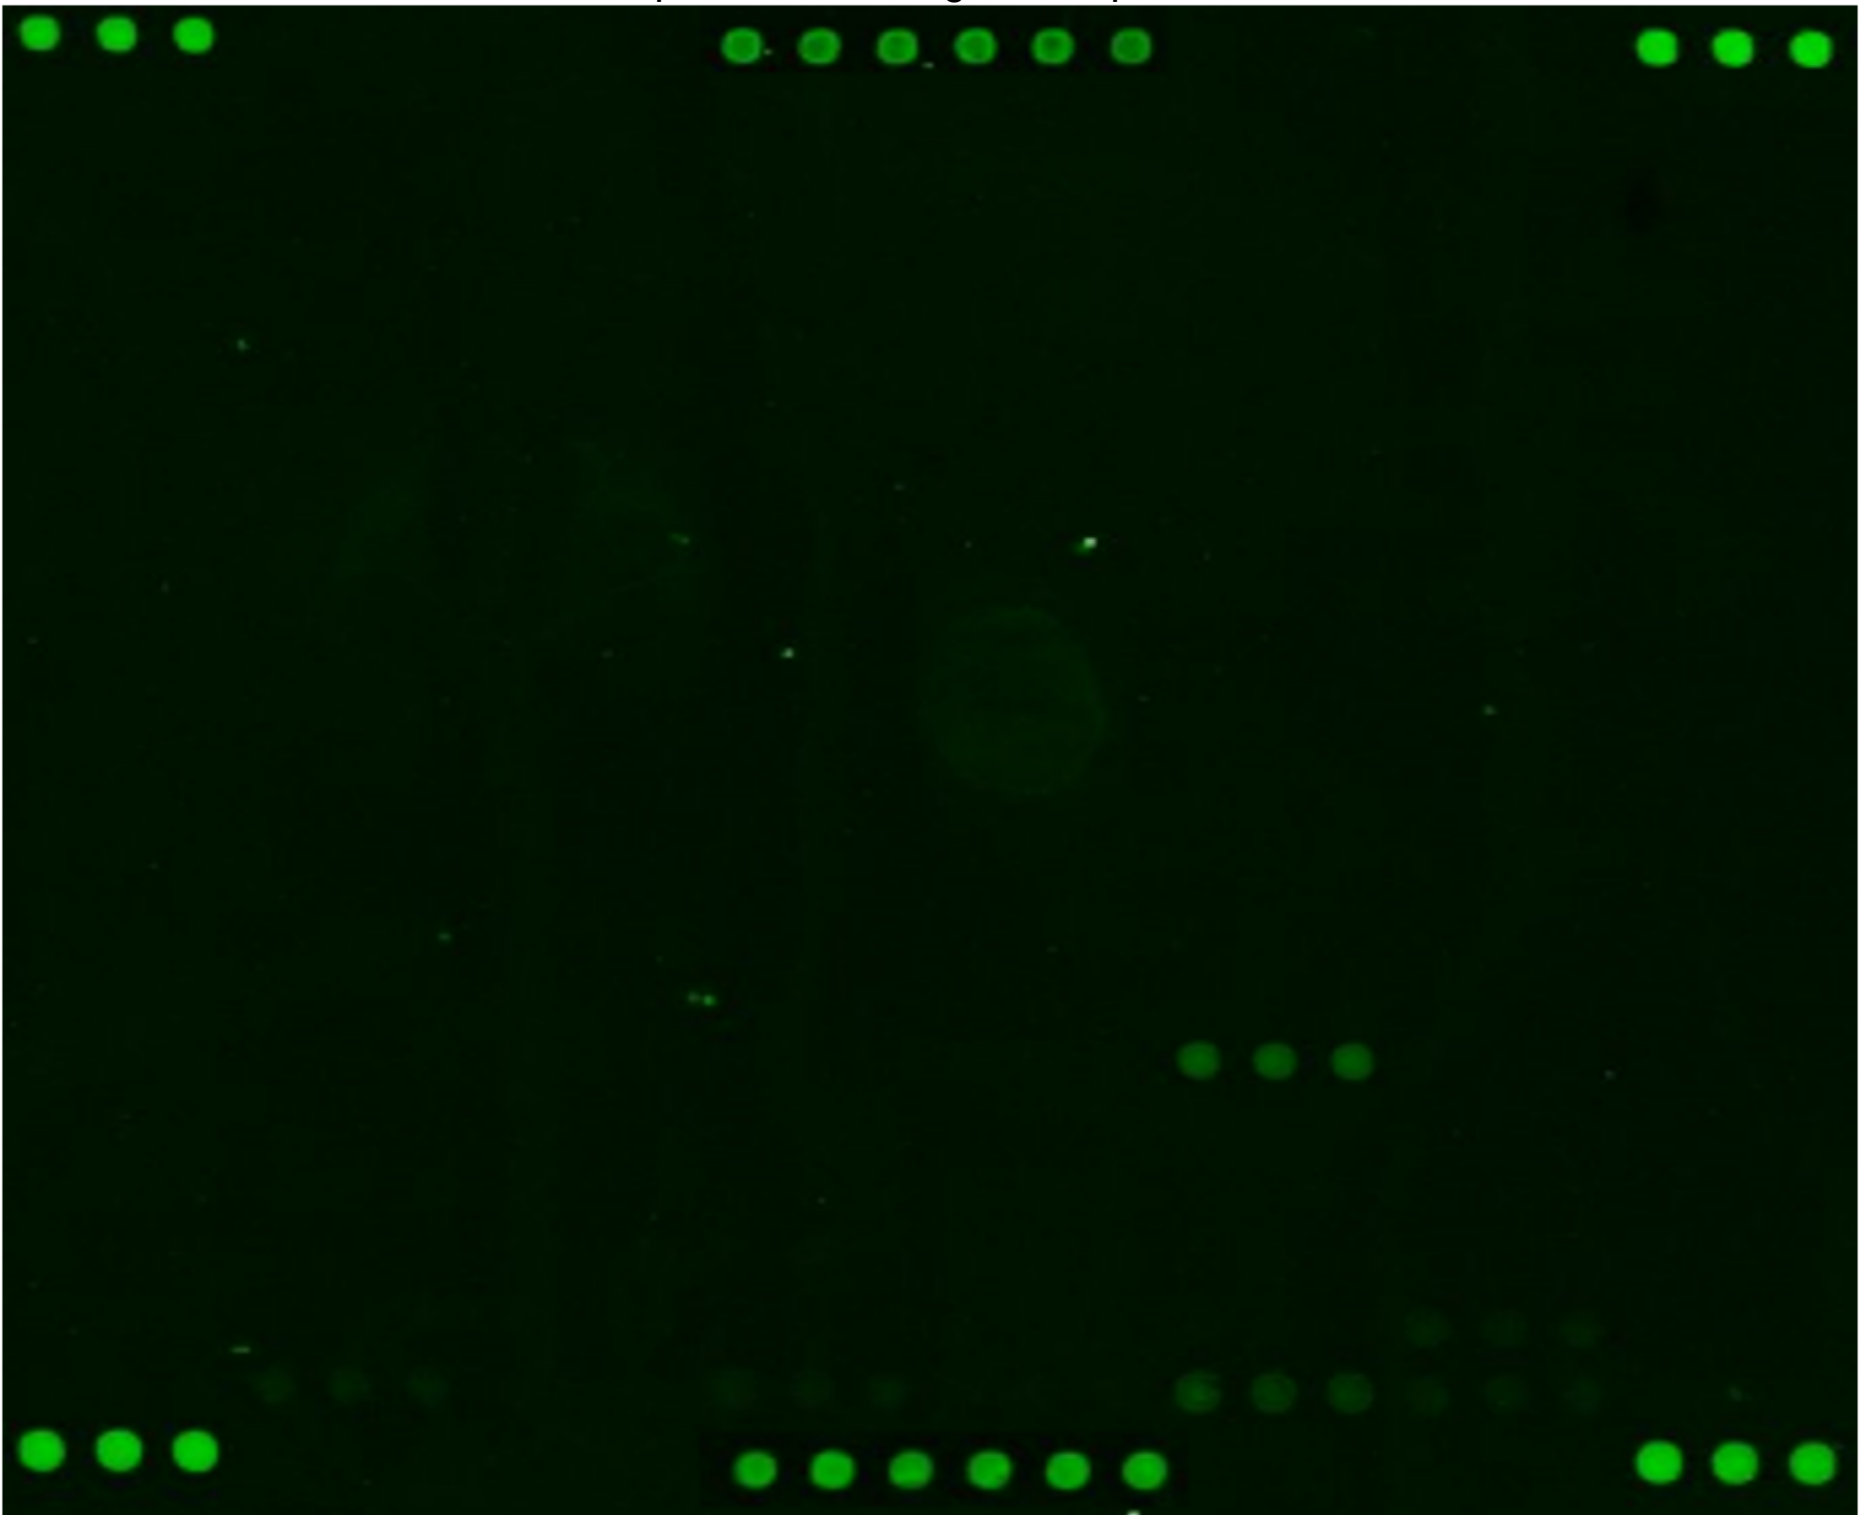



Specimen 12 ( genechip )

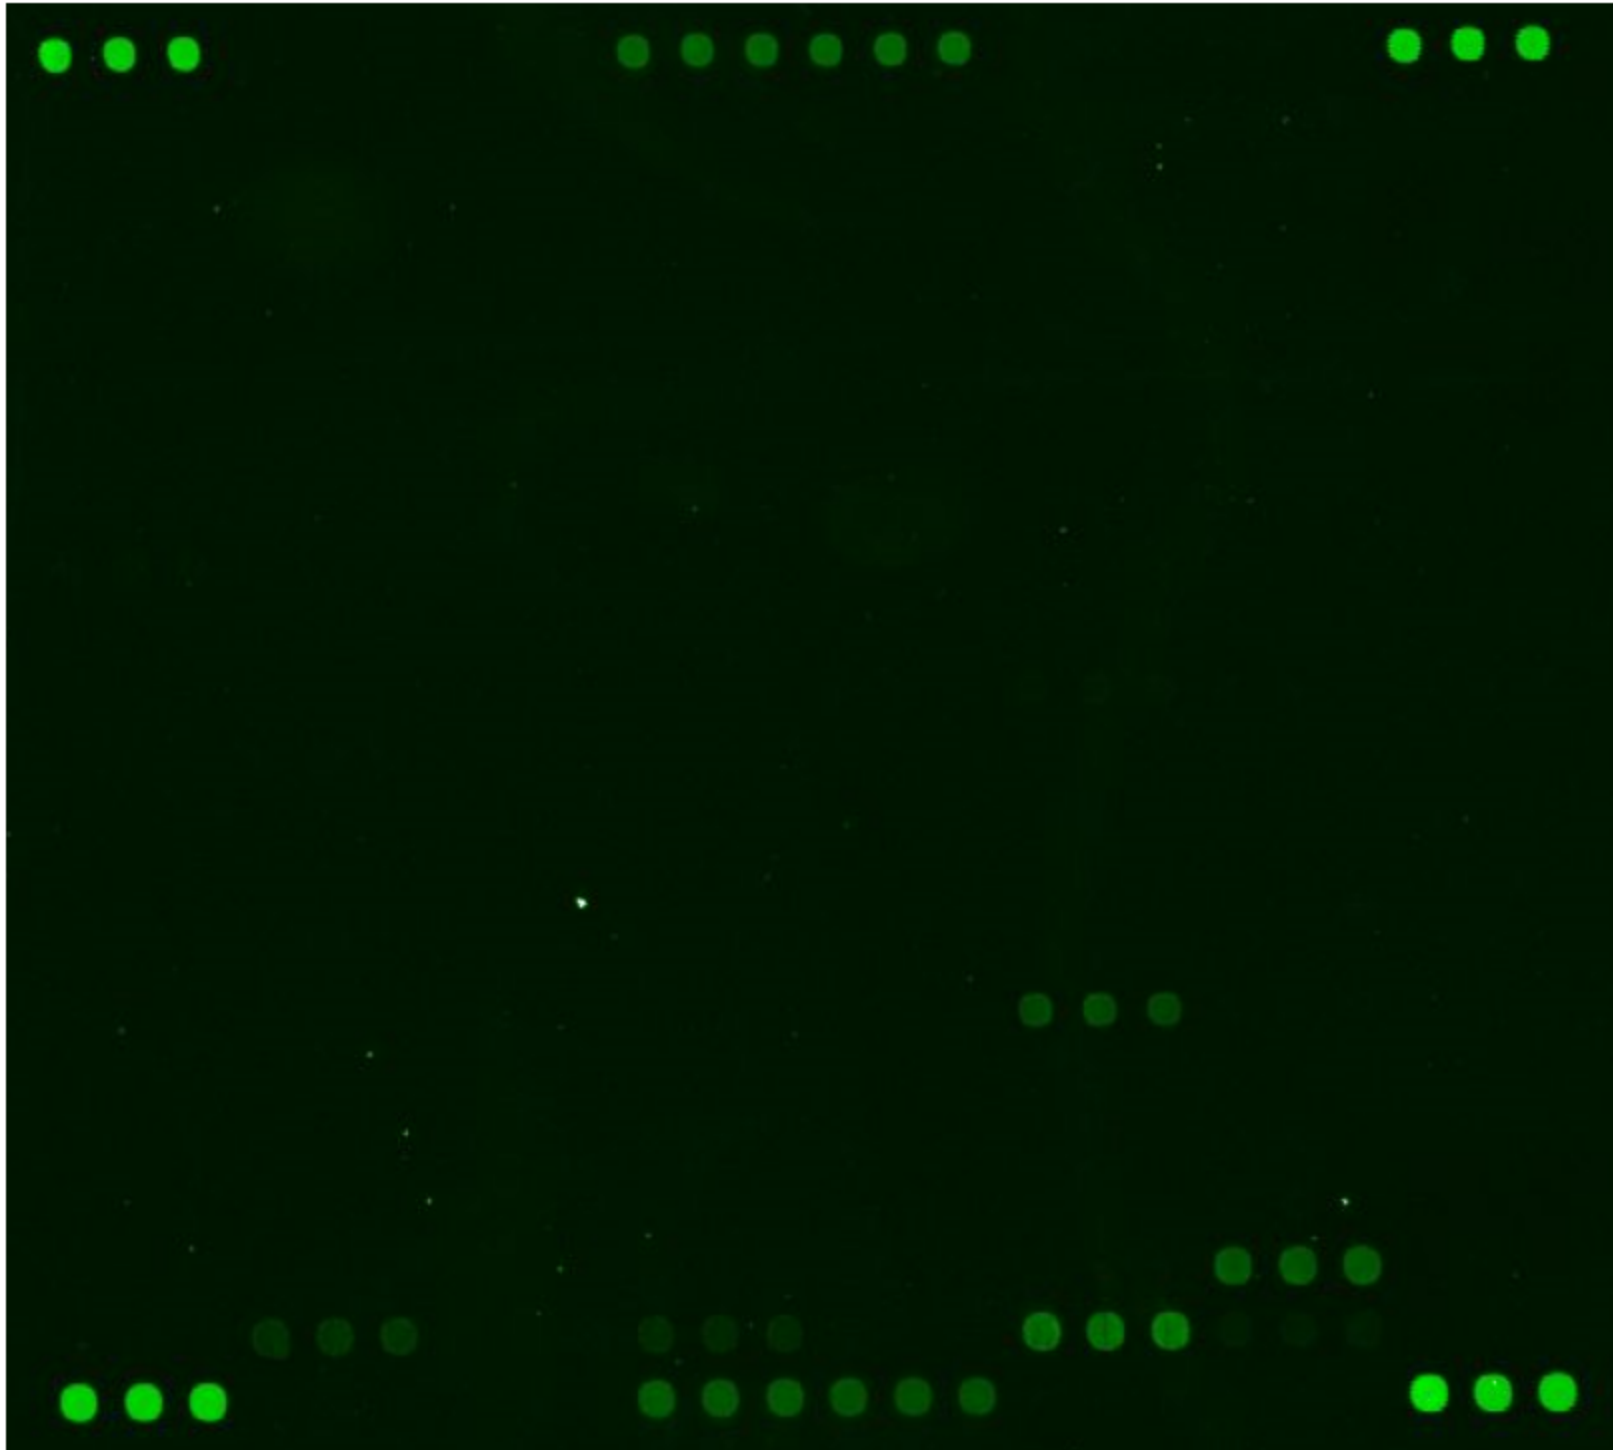

Specimen 13 ( genechip )

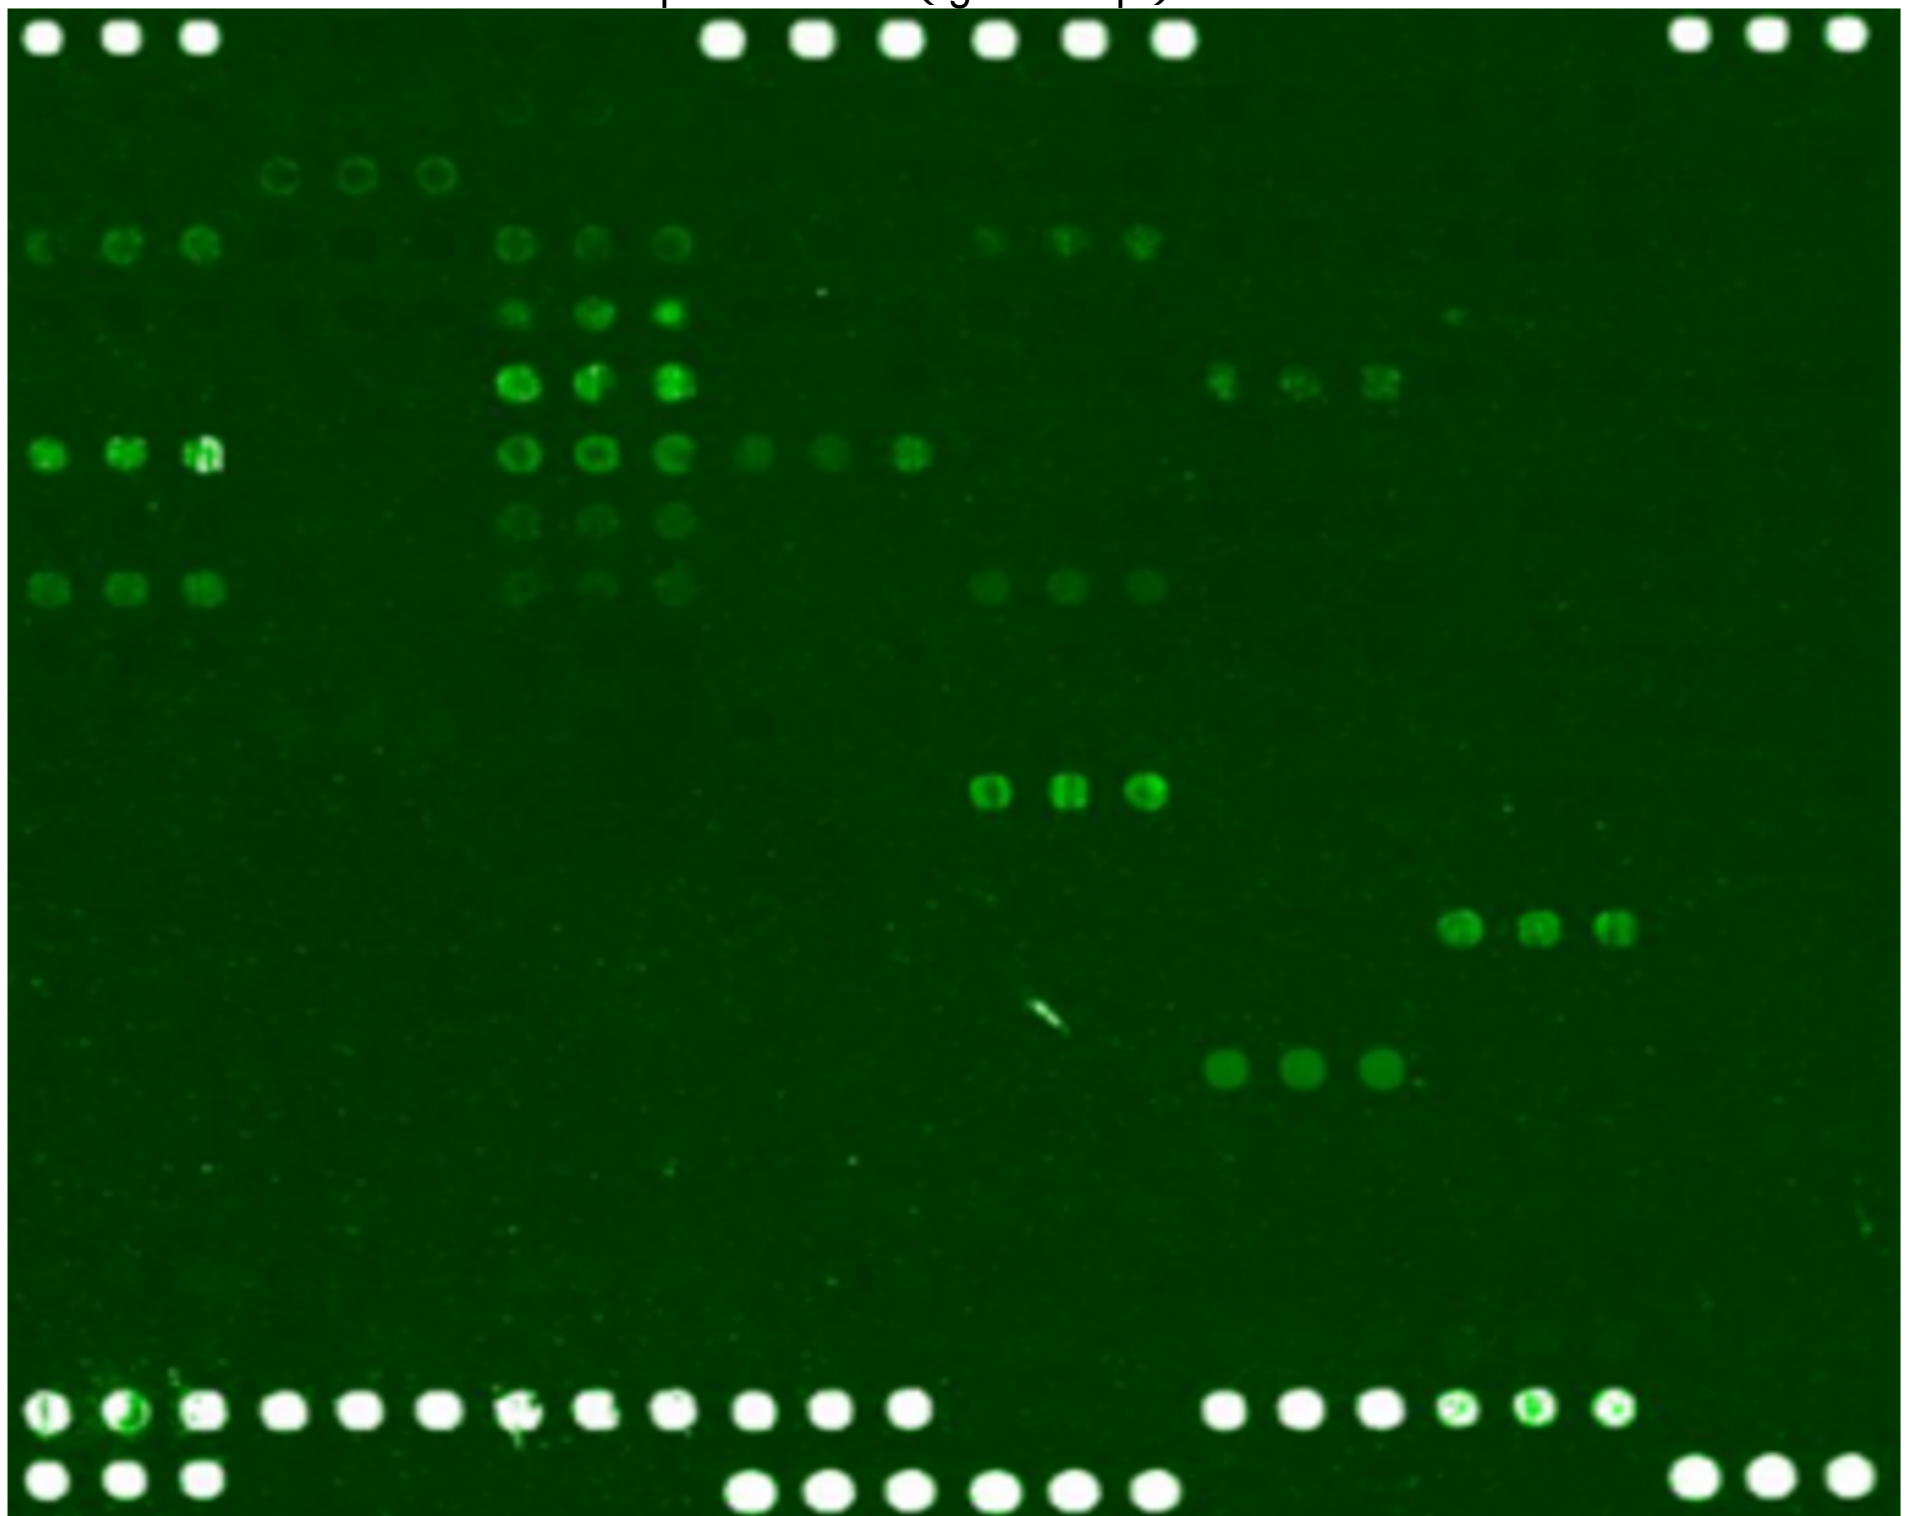

Specimen 14 ( genechip )

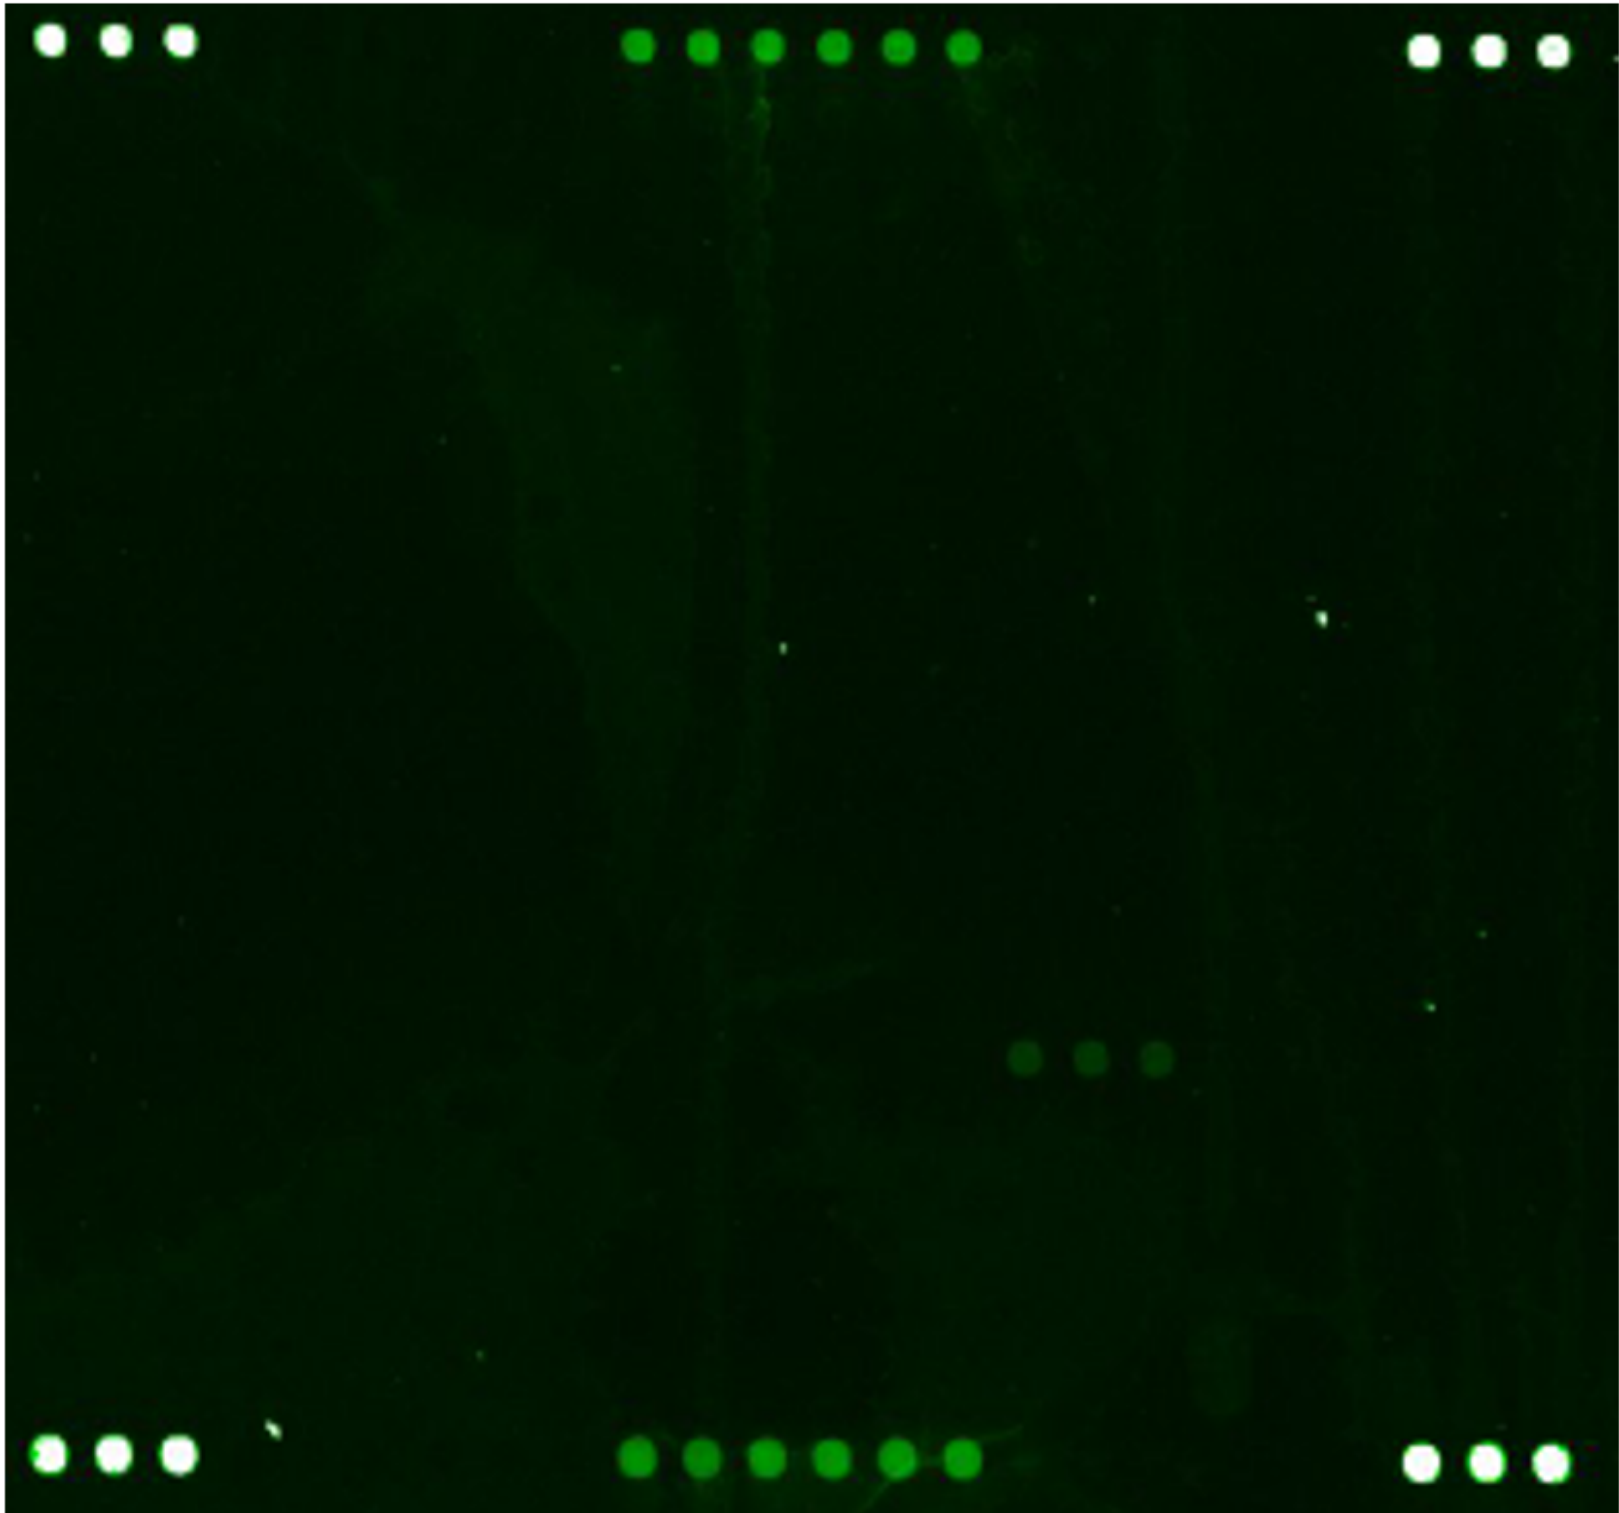

Specimen 15 ( genechip )

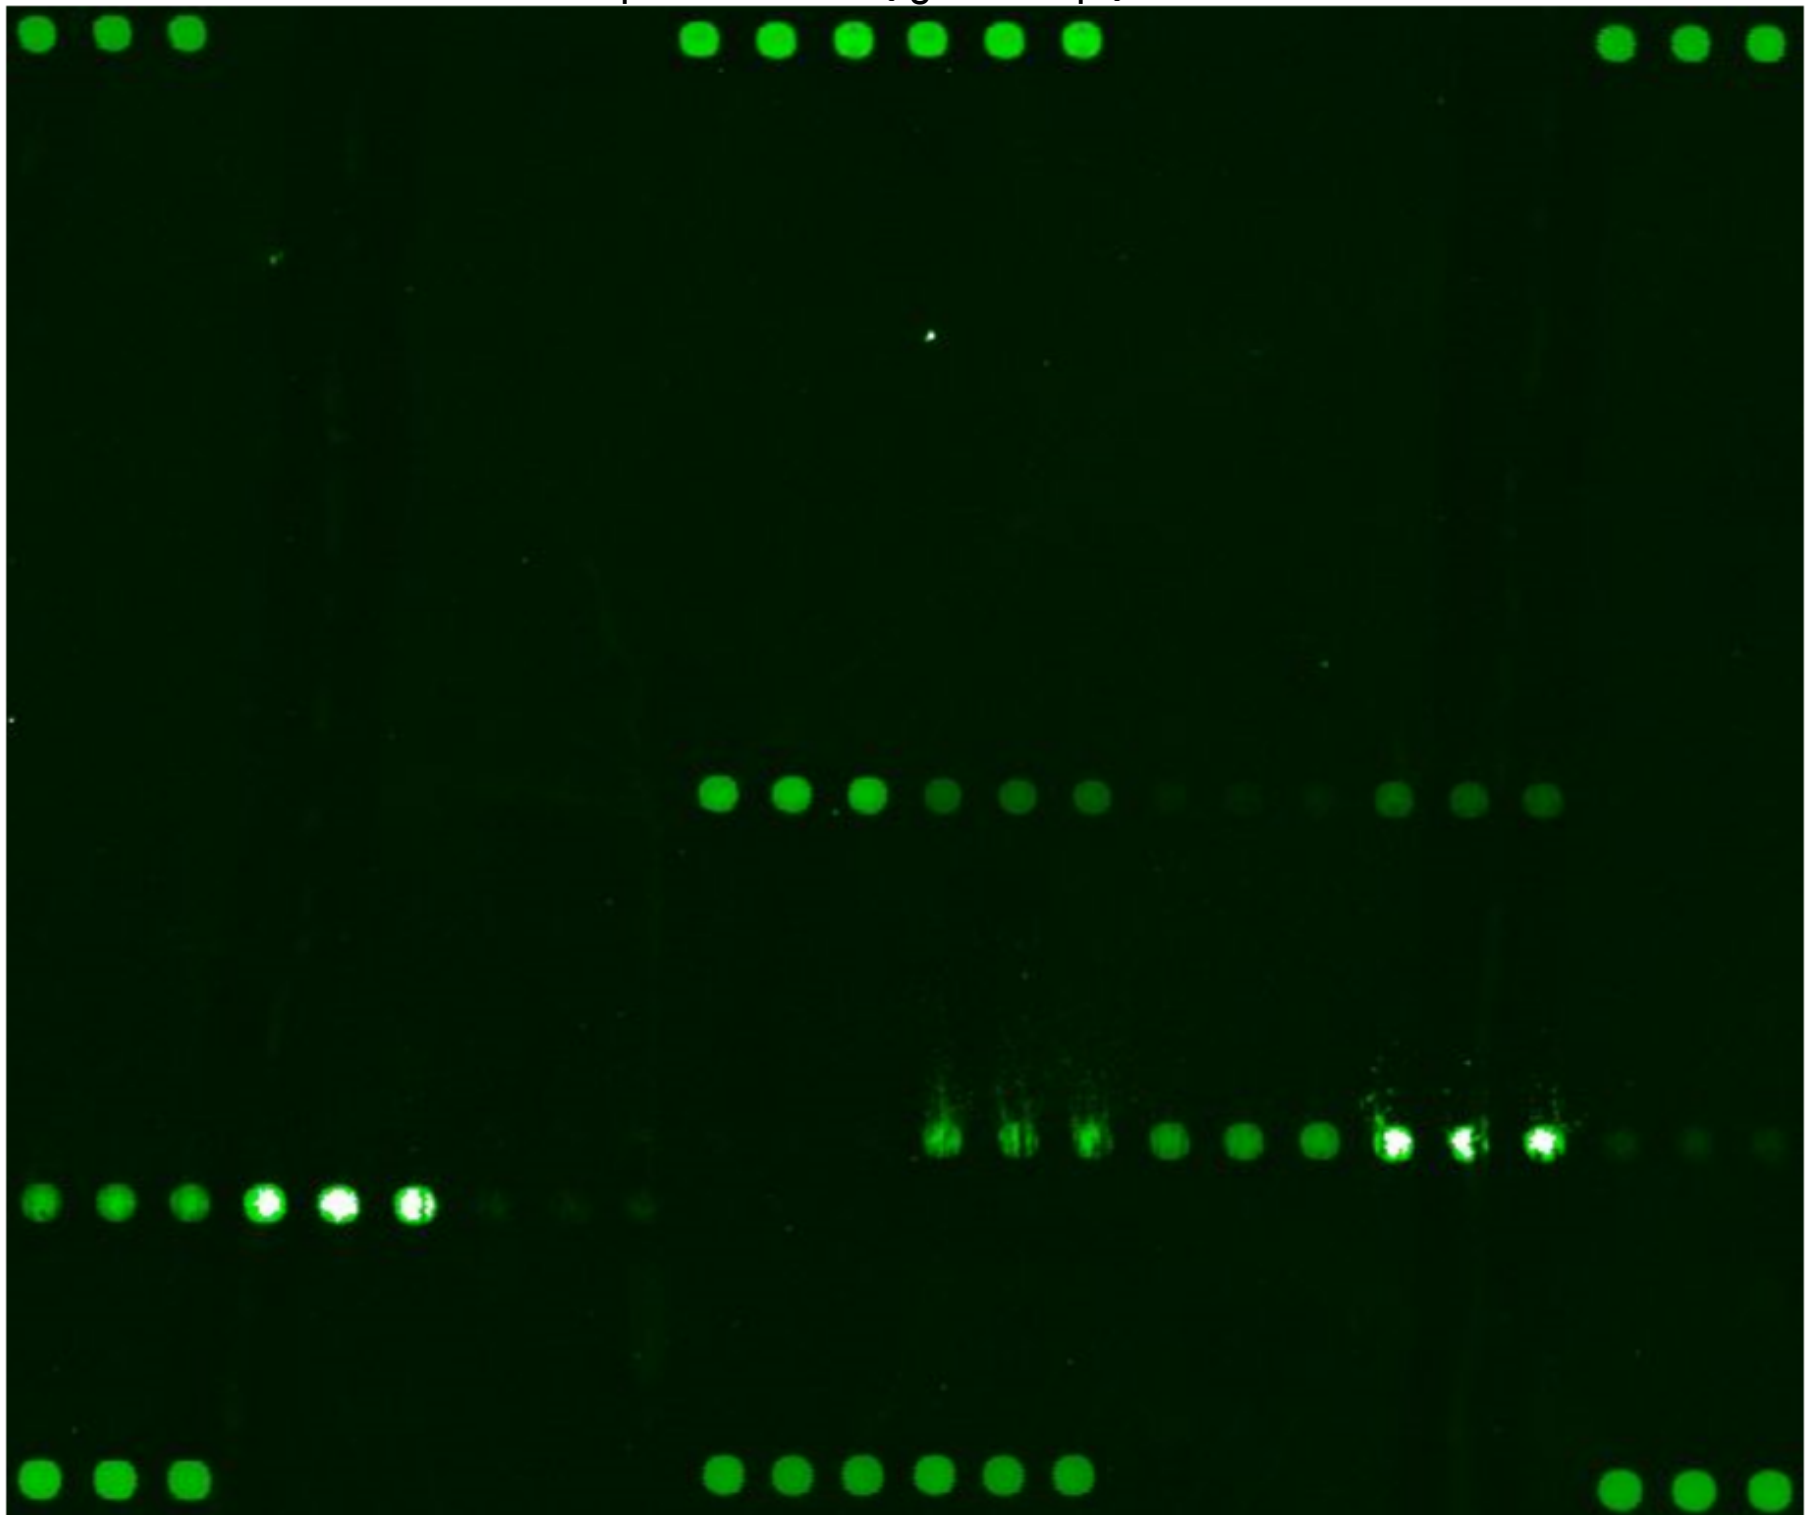

Specimen 16 (genechip)

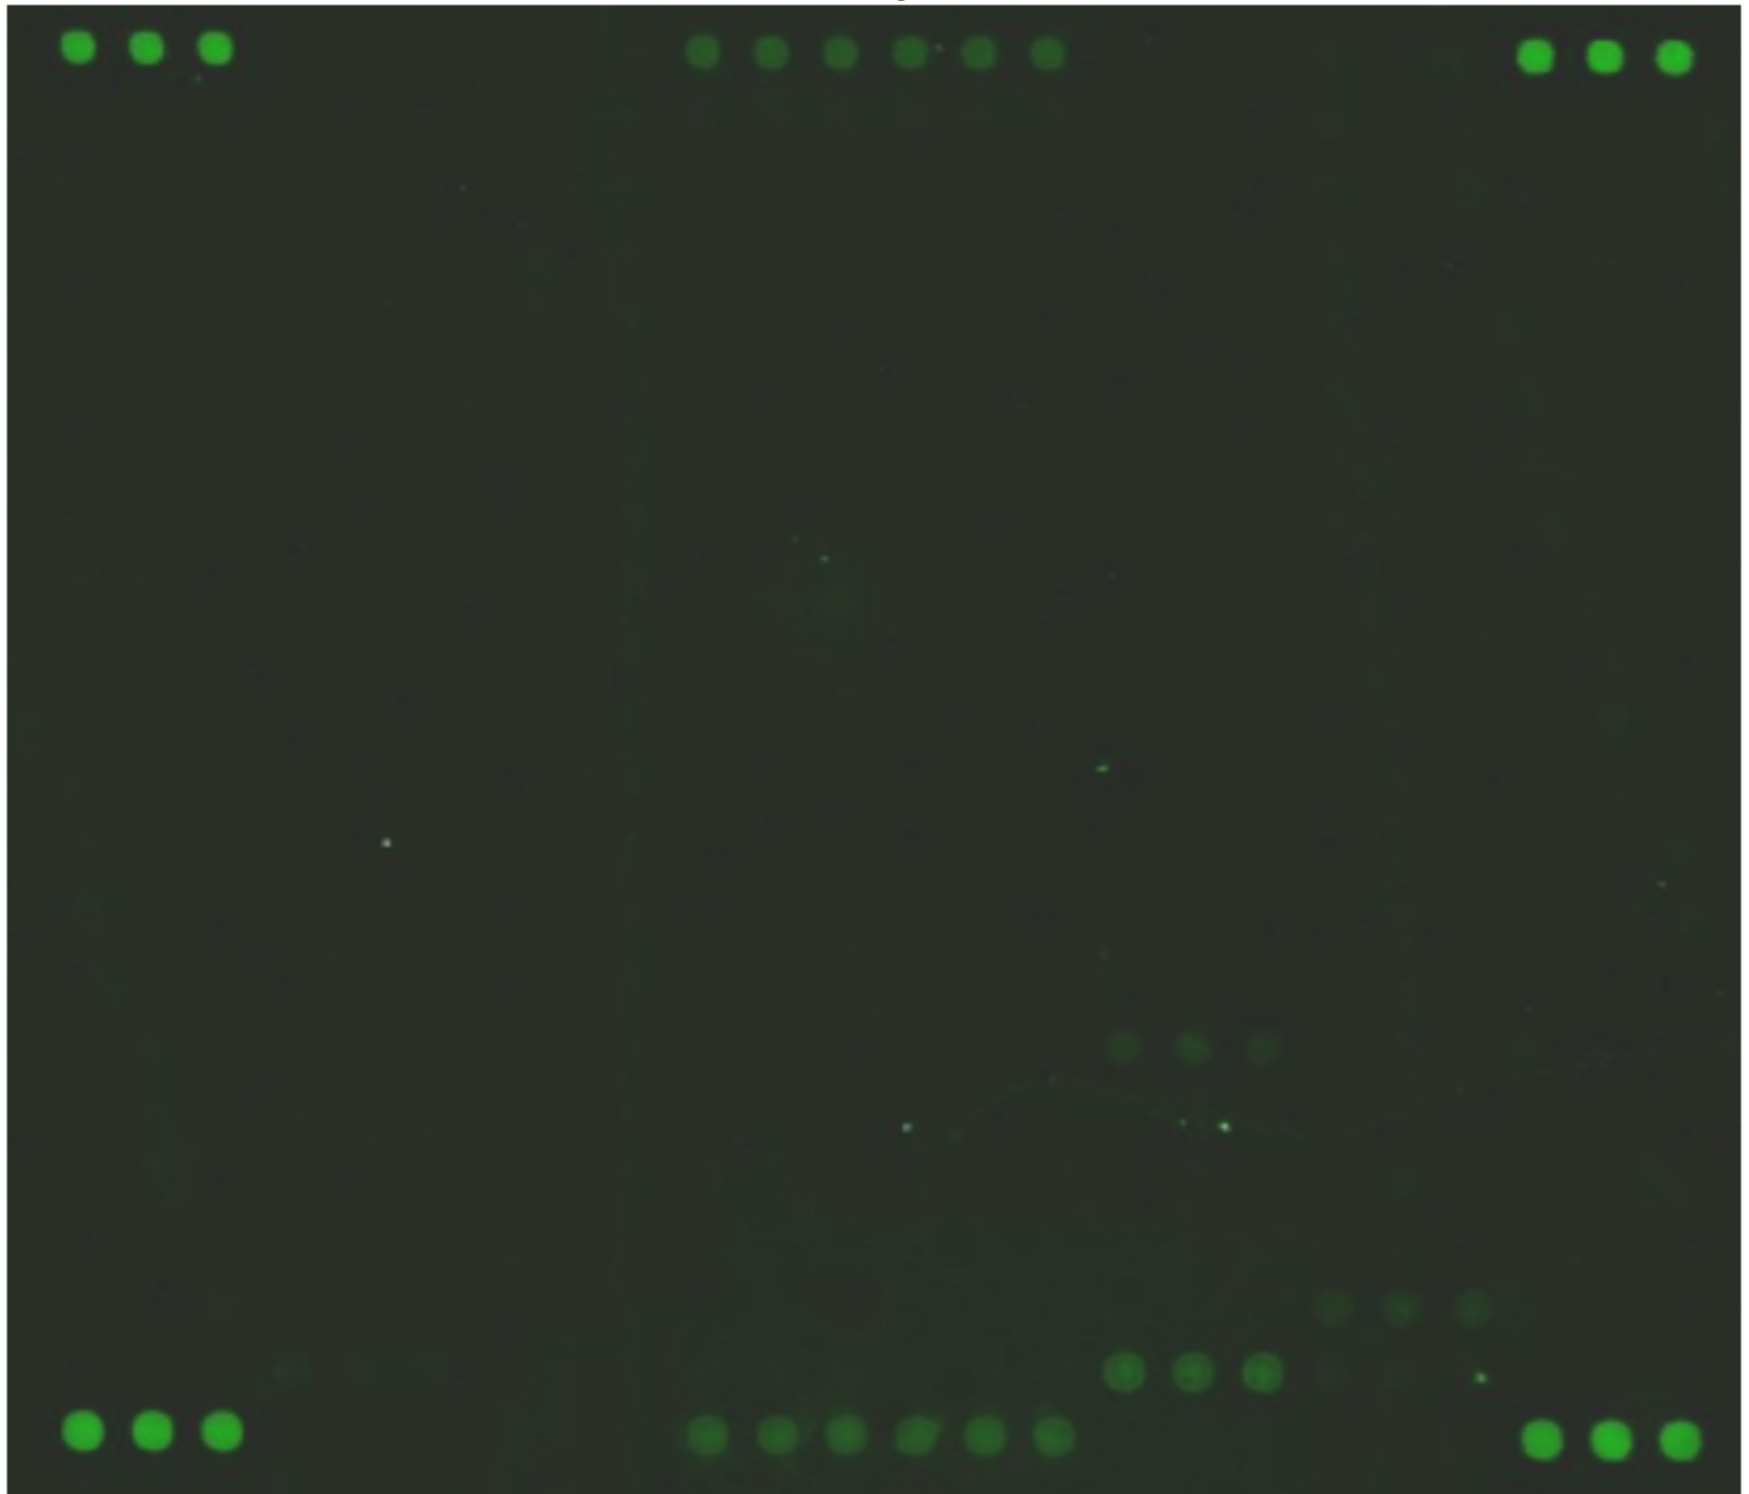

Specimen 17 (genechip)

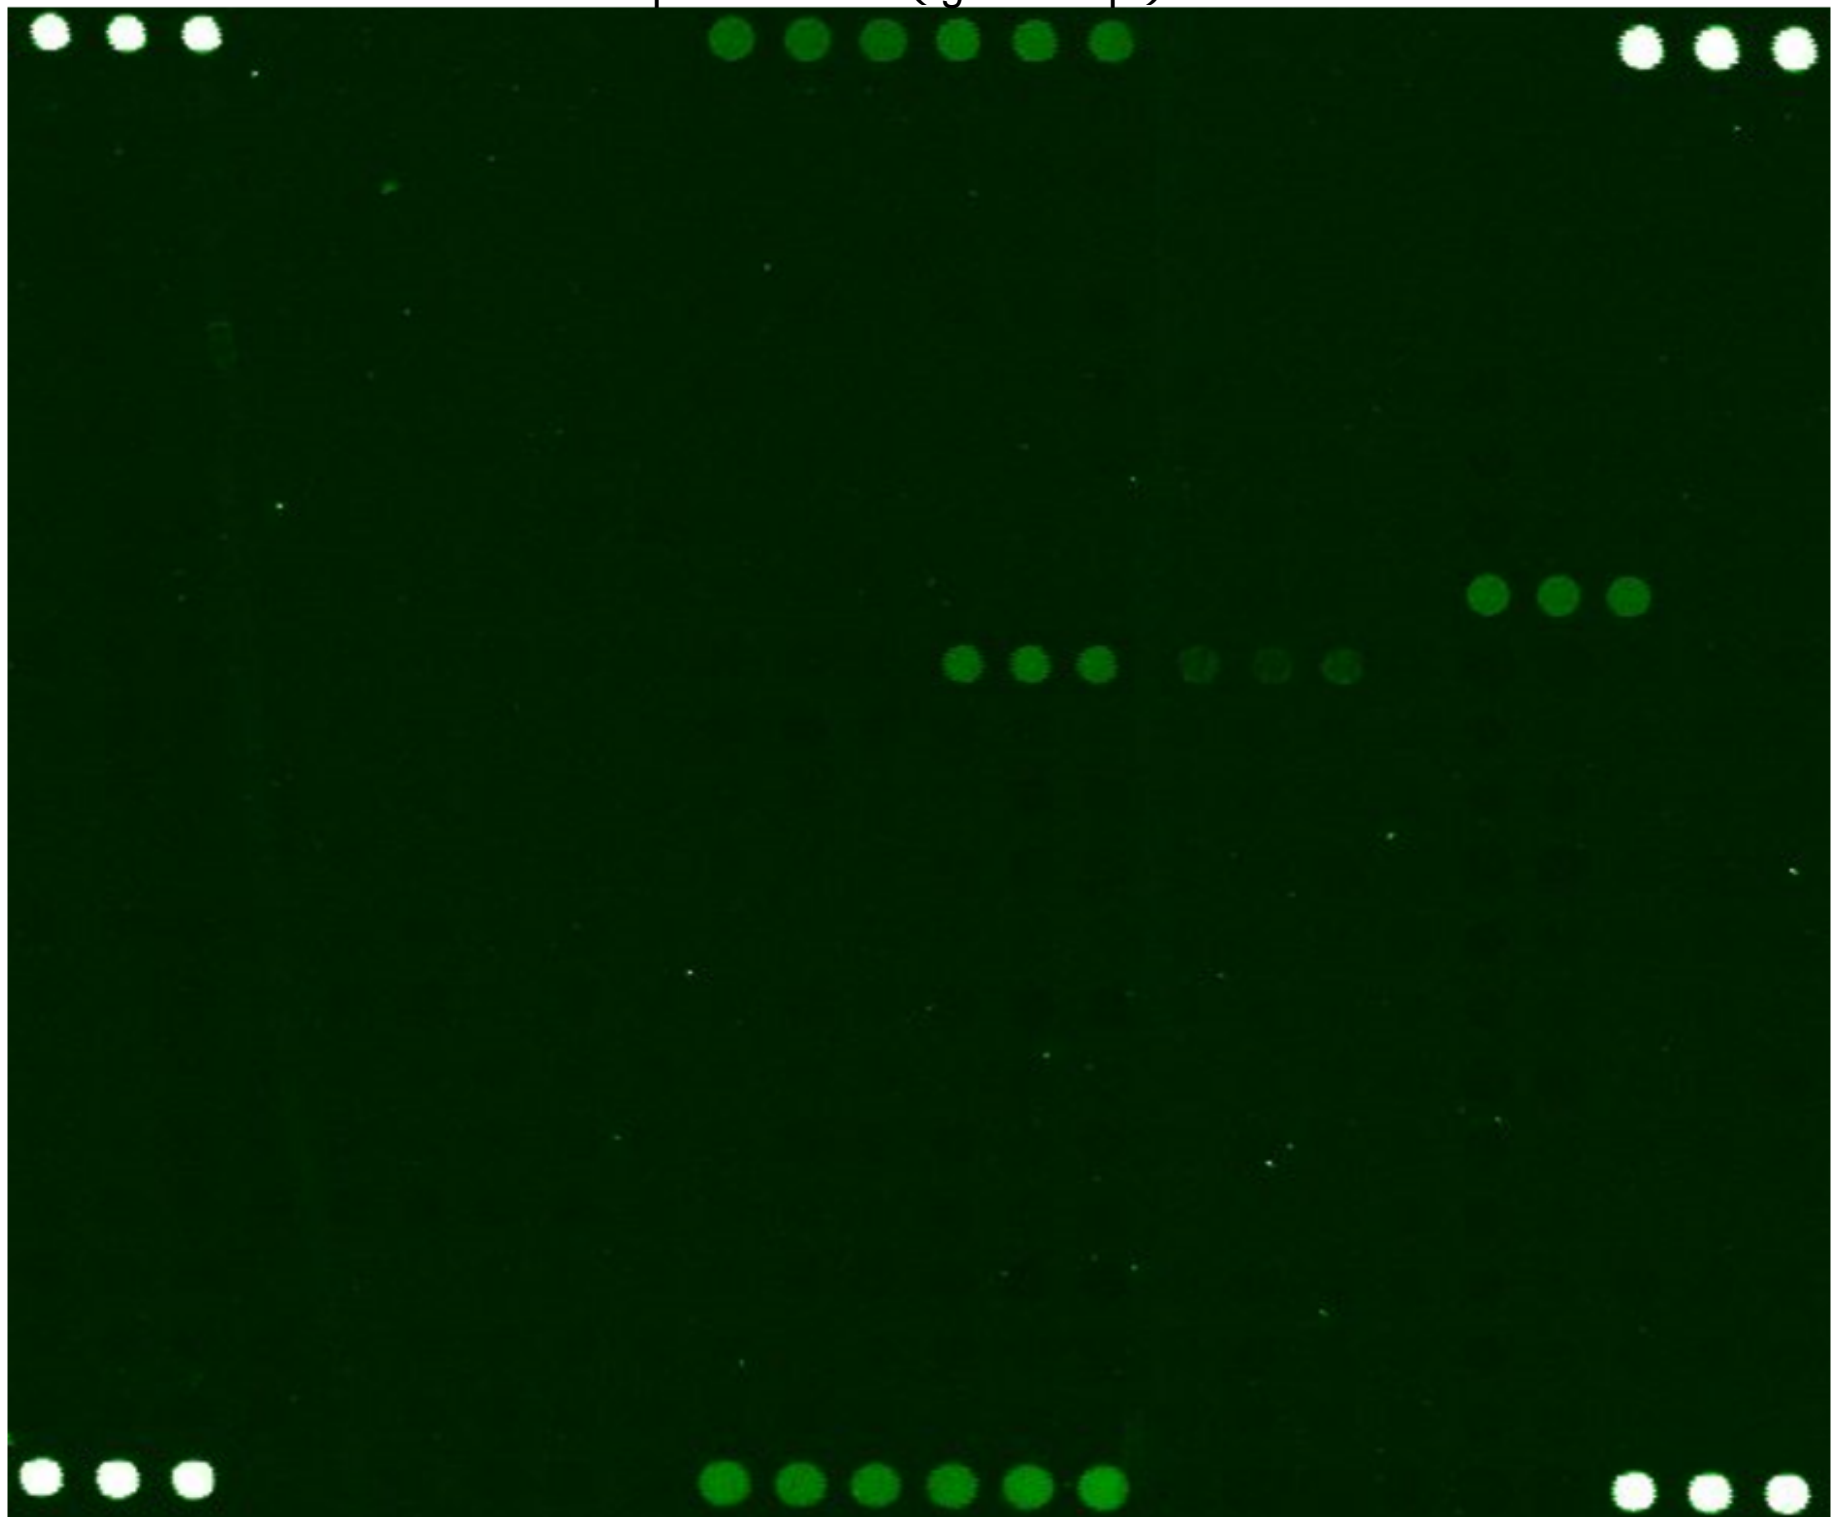

Specimen 18 ( genechip )

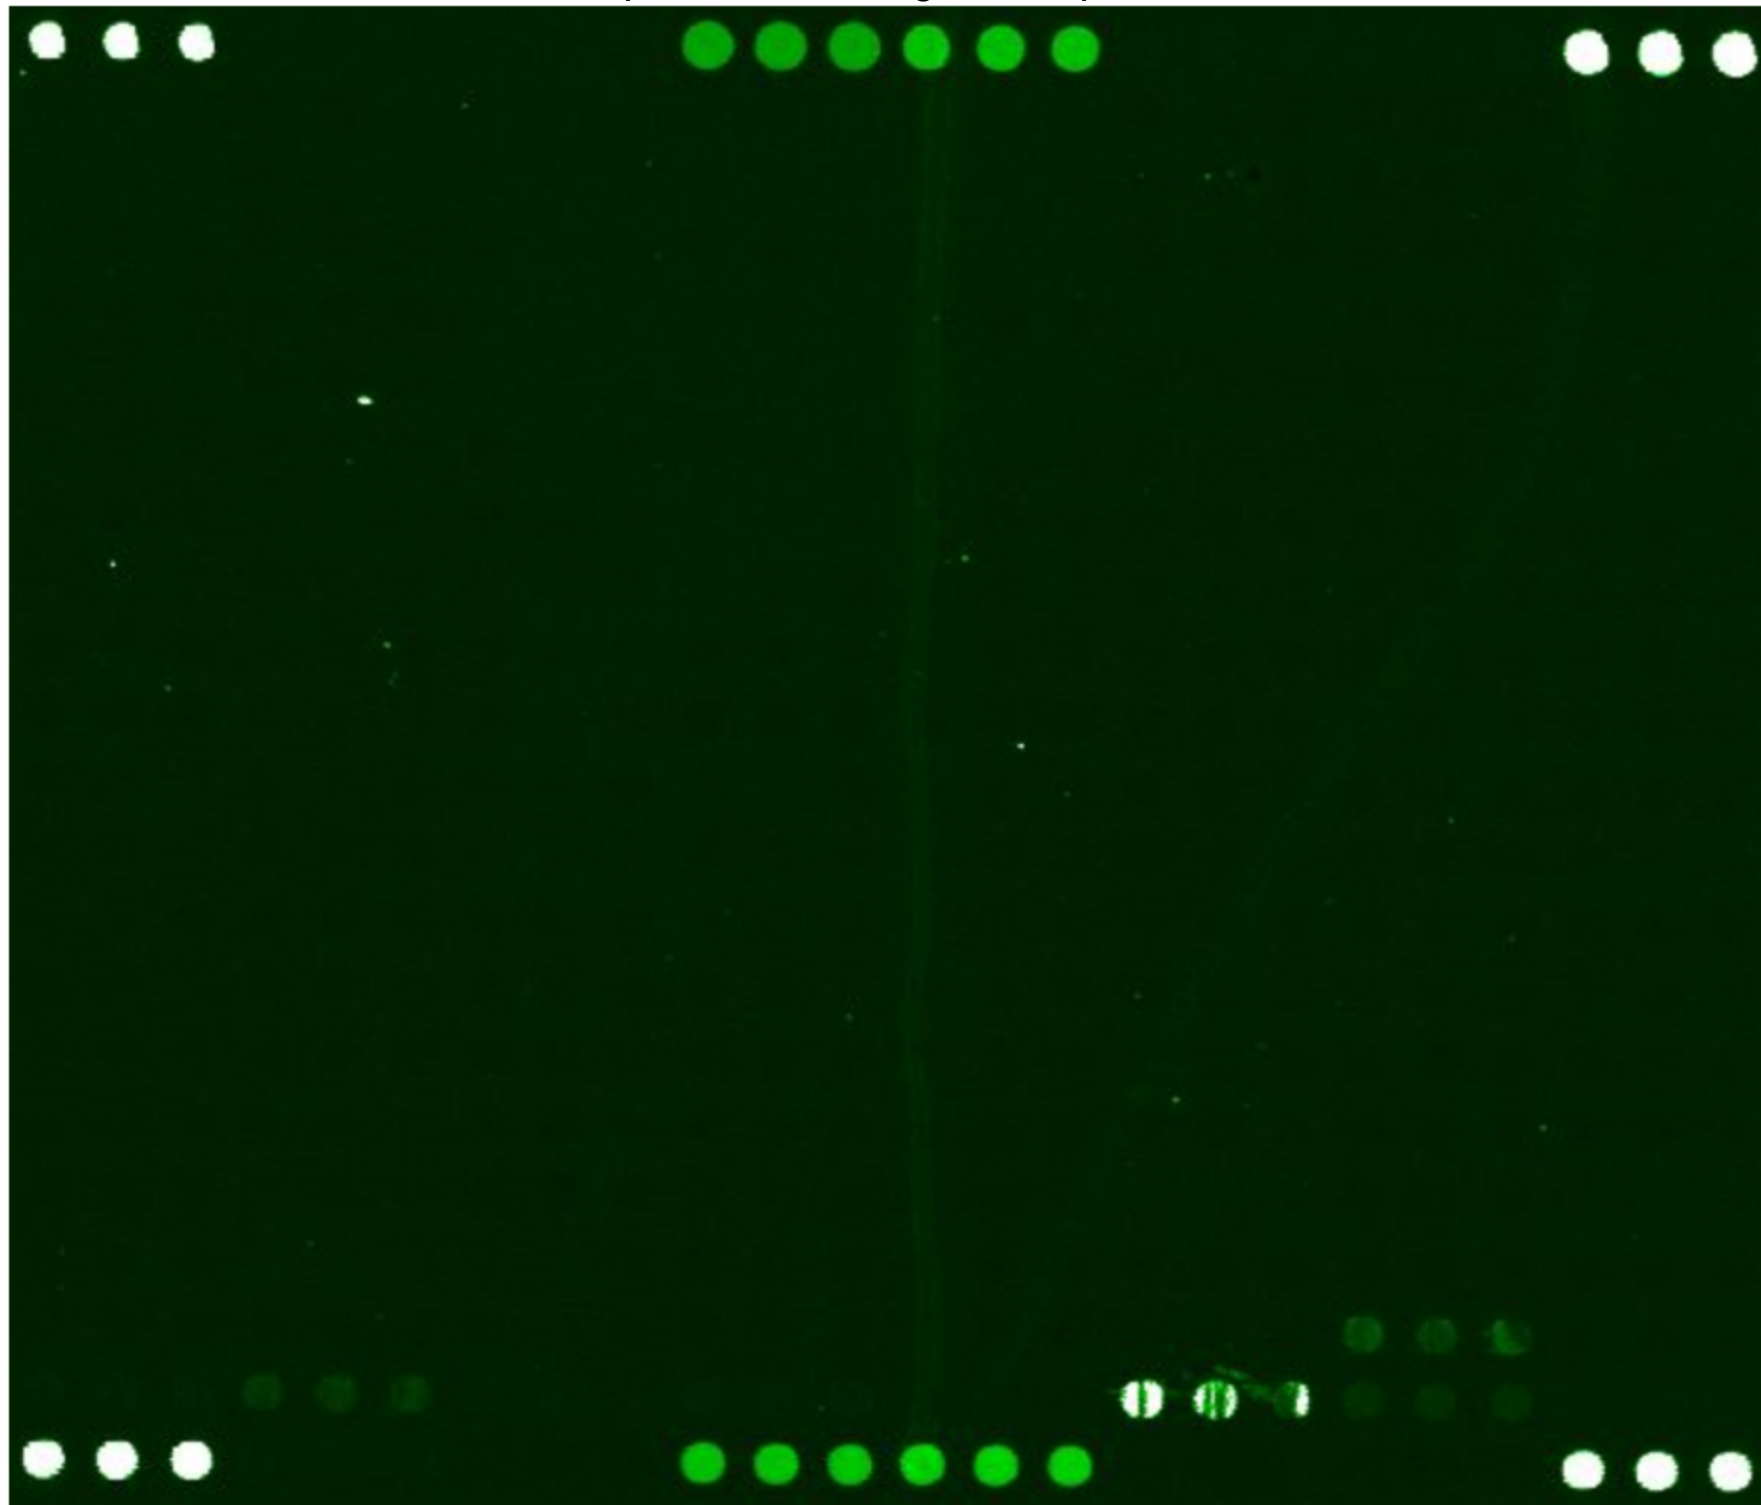





Specimen 20 (genechip)

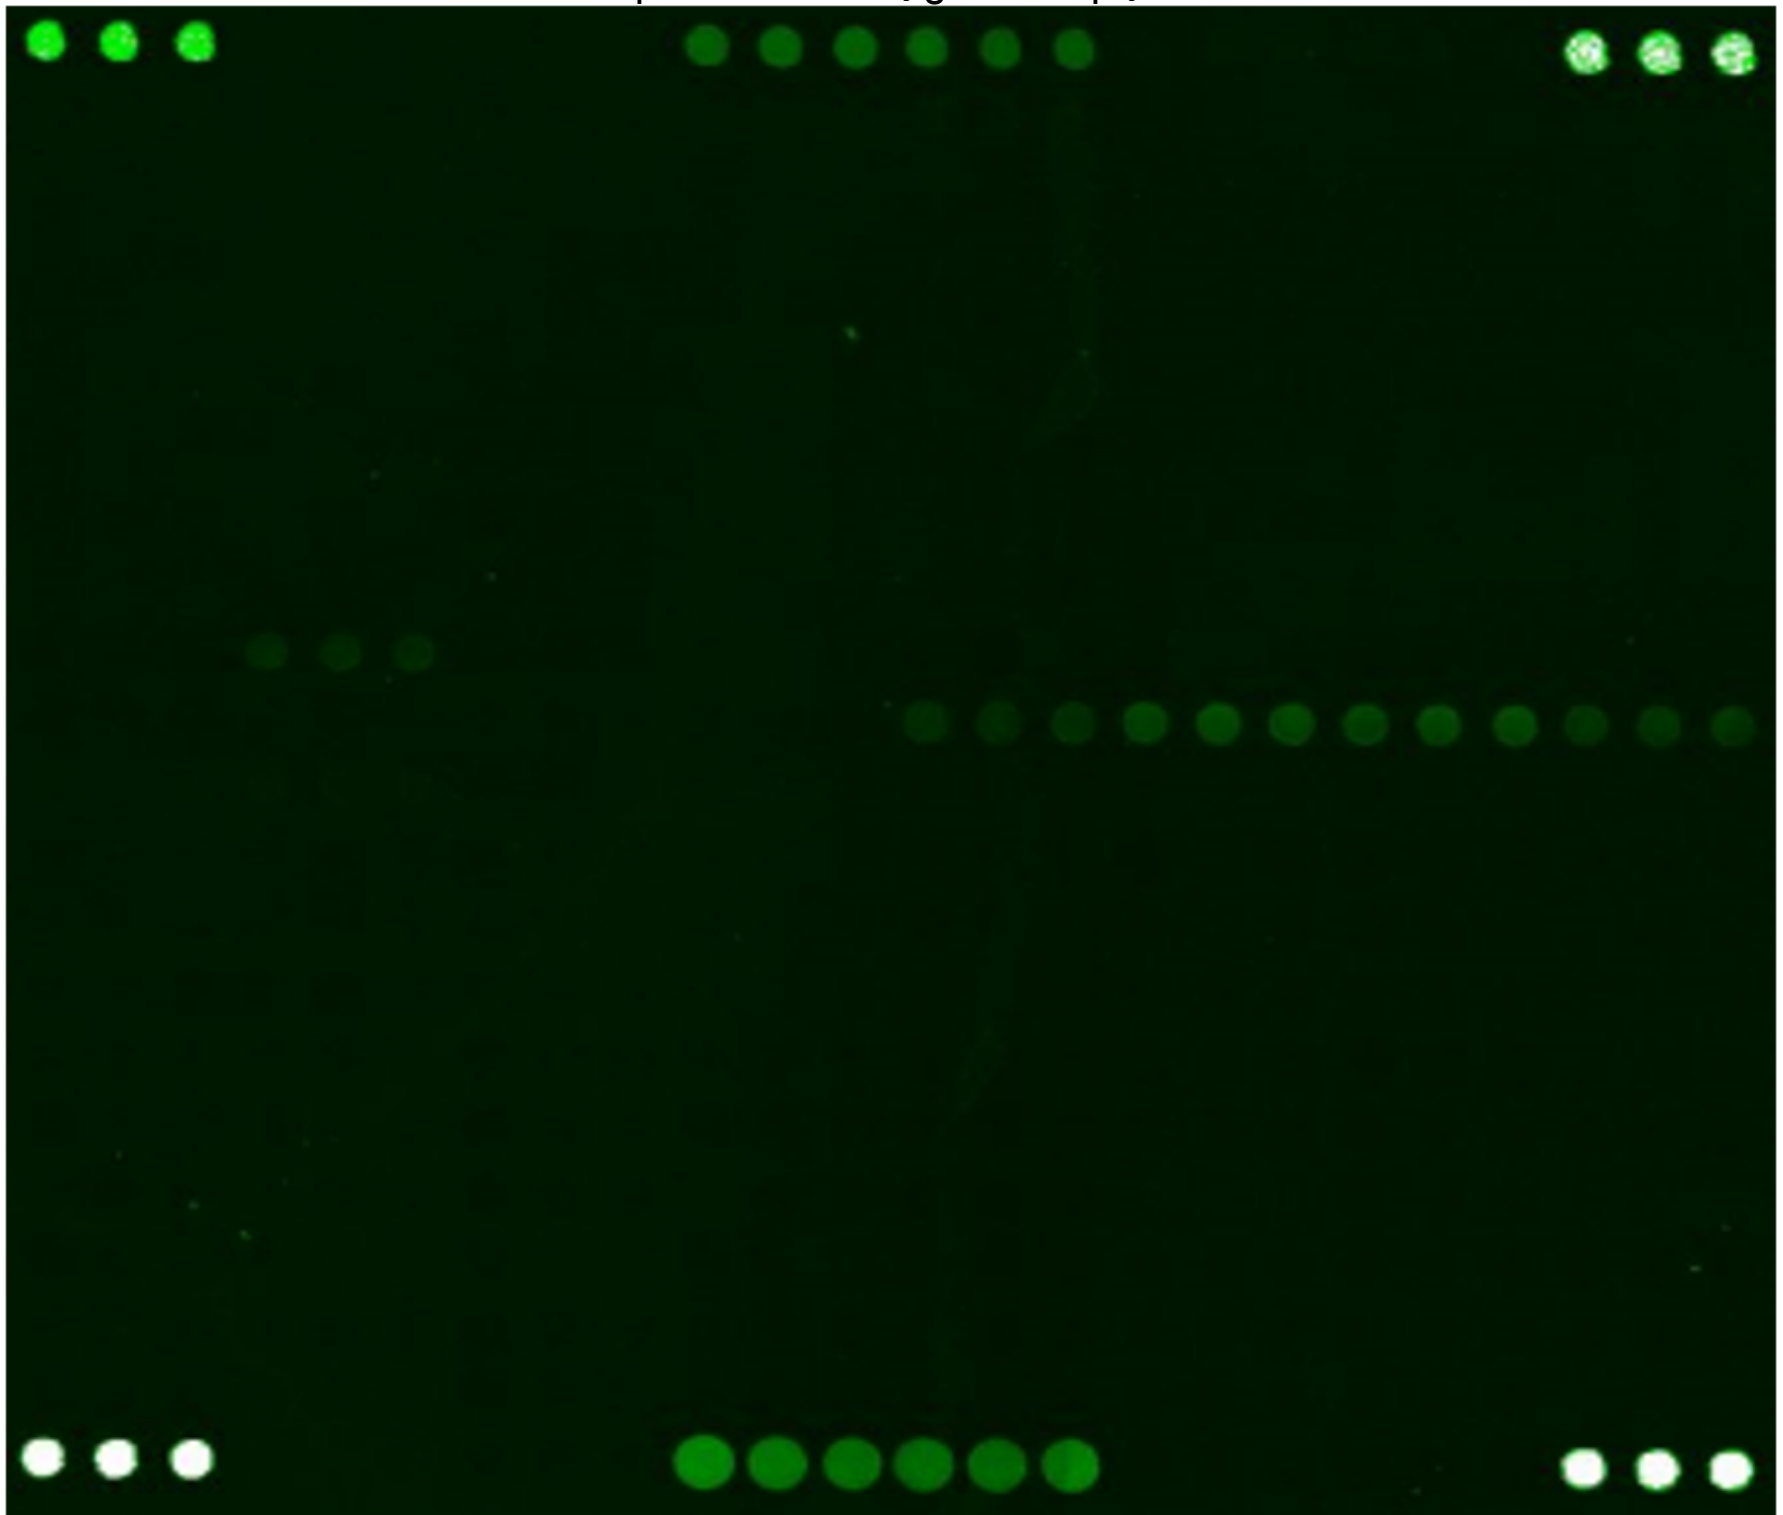

Specimen 21 ( genechip )

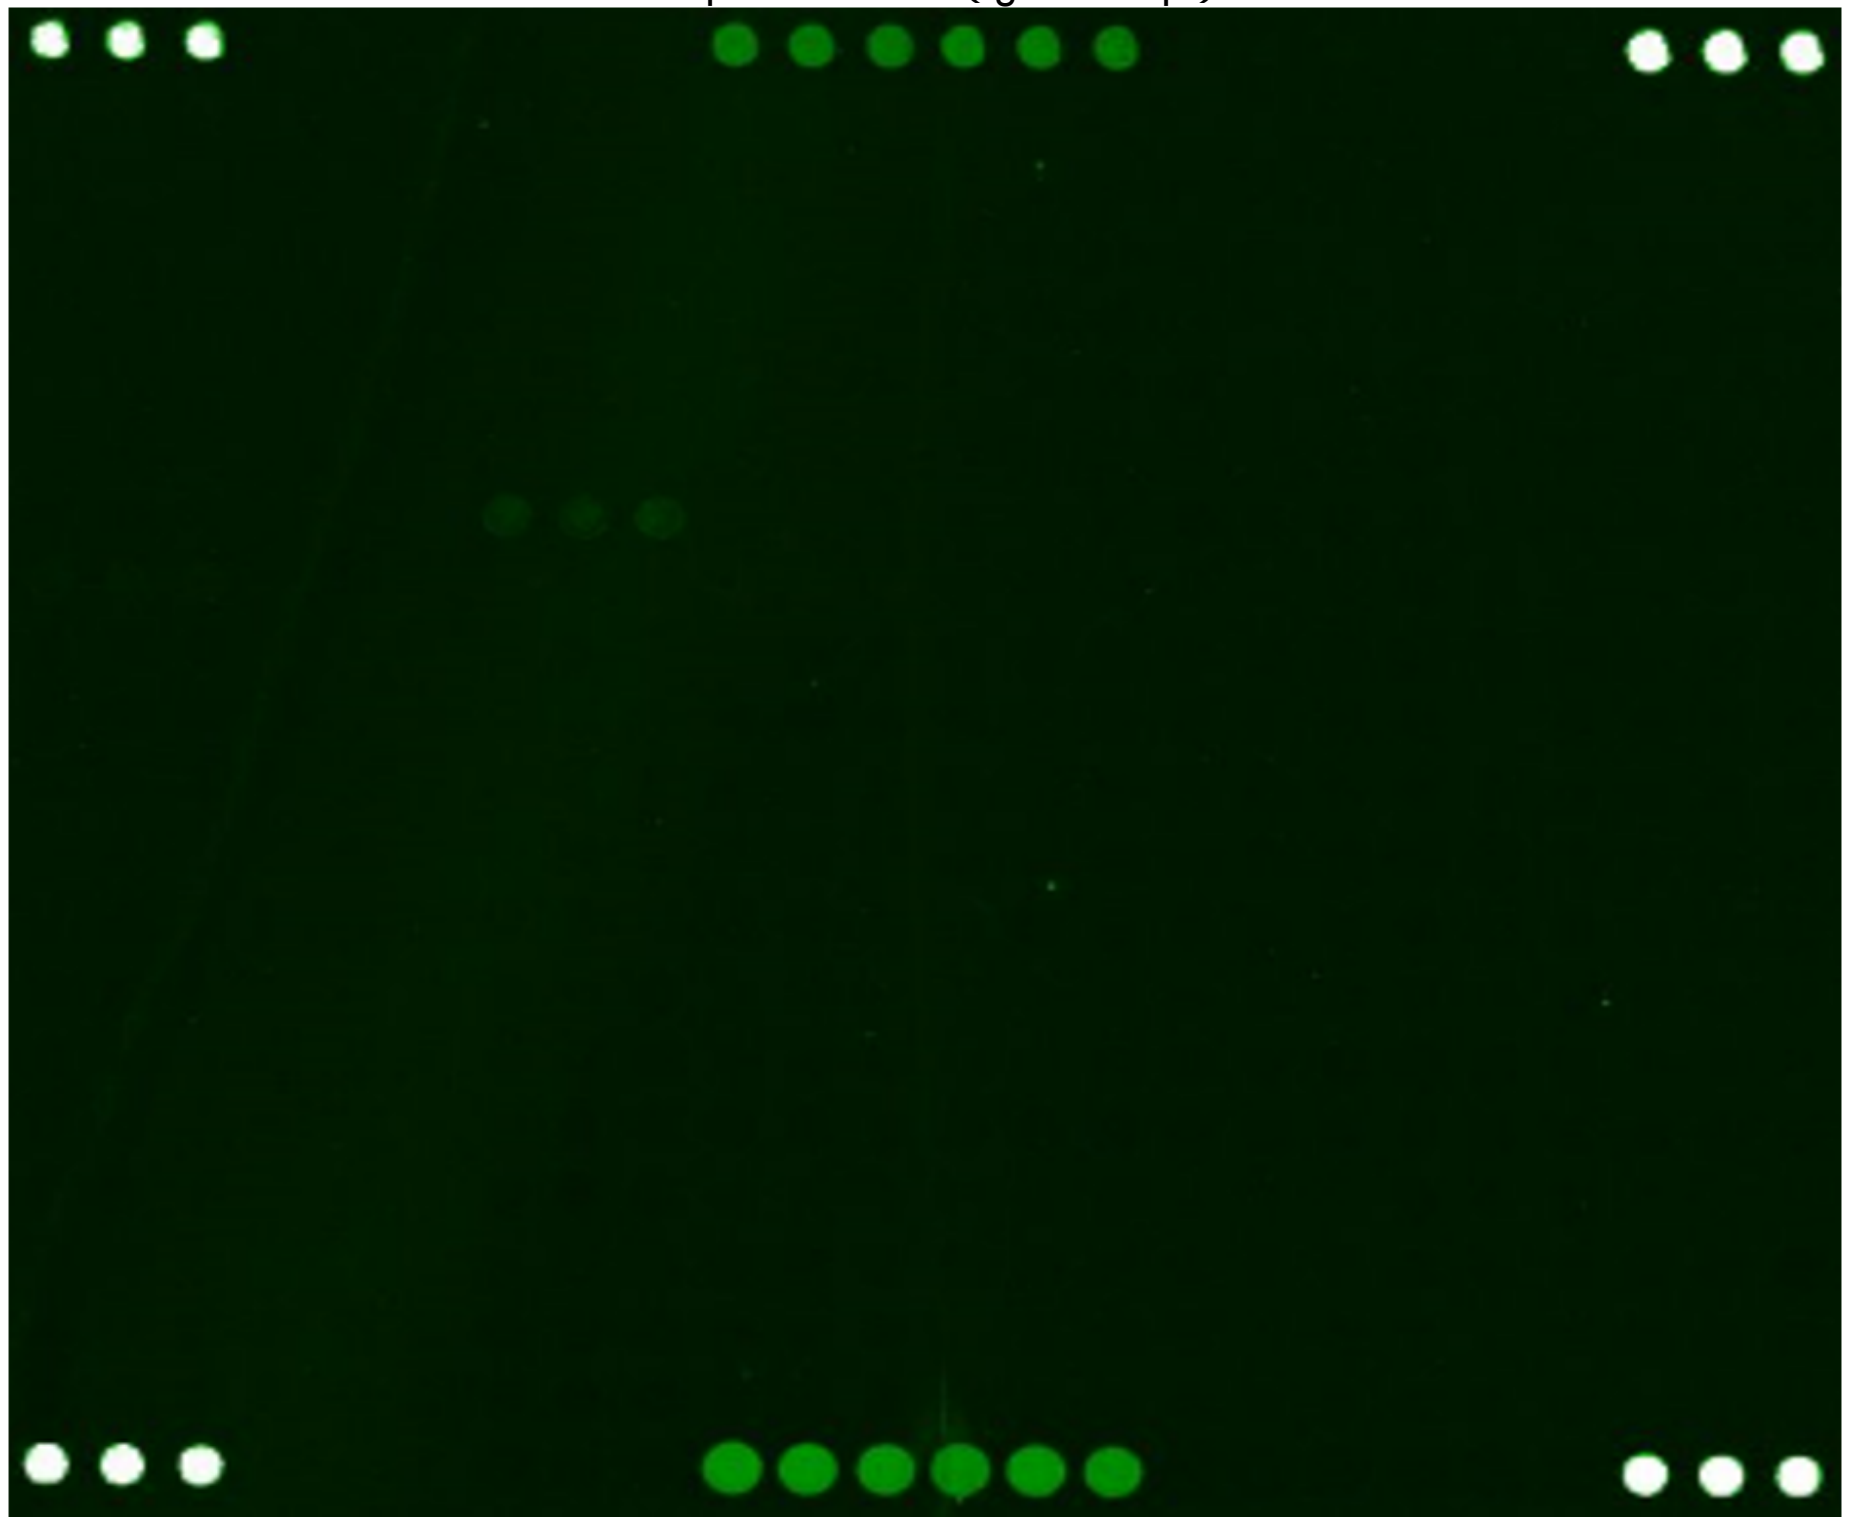

Specimen 22 ( genechip )

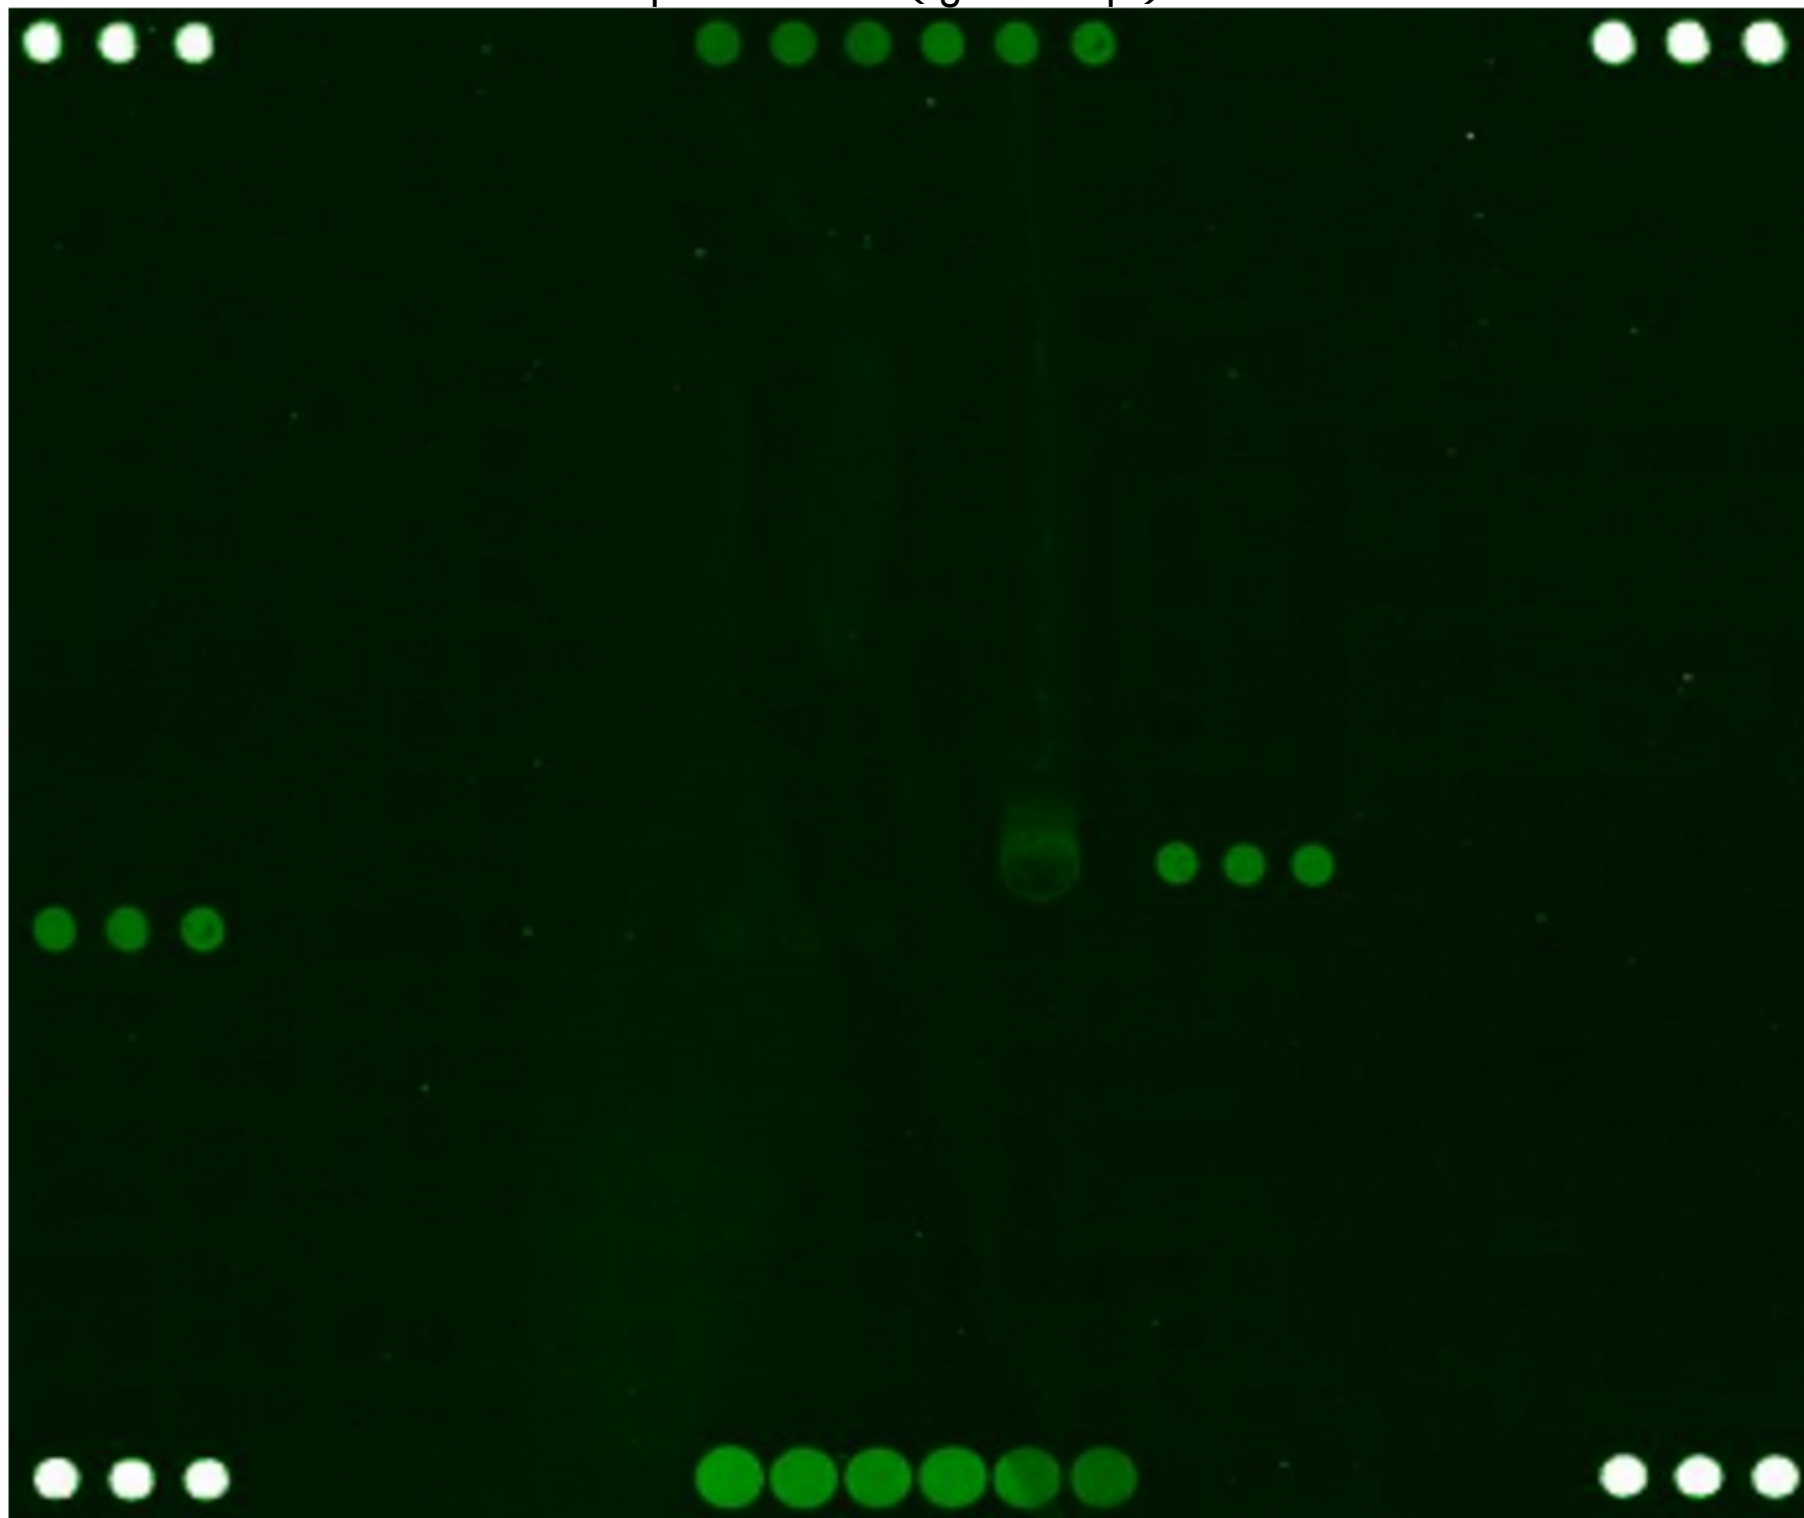

Specimen 23 (genechip)

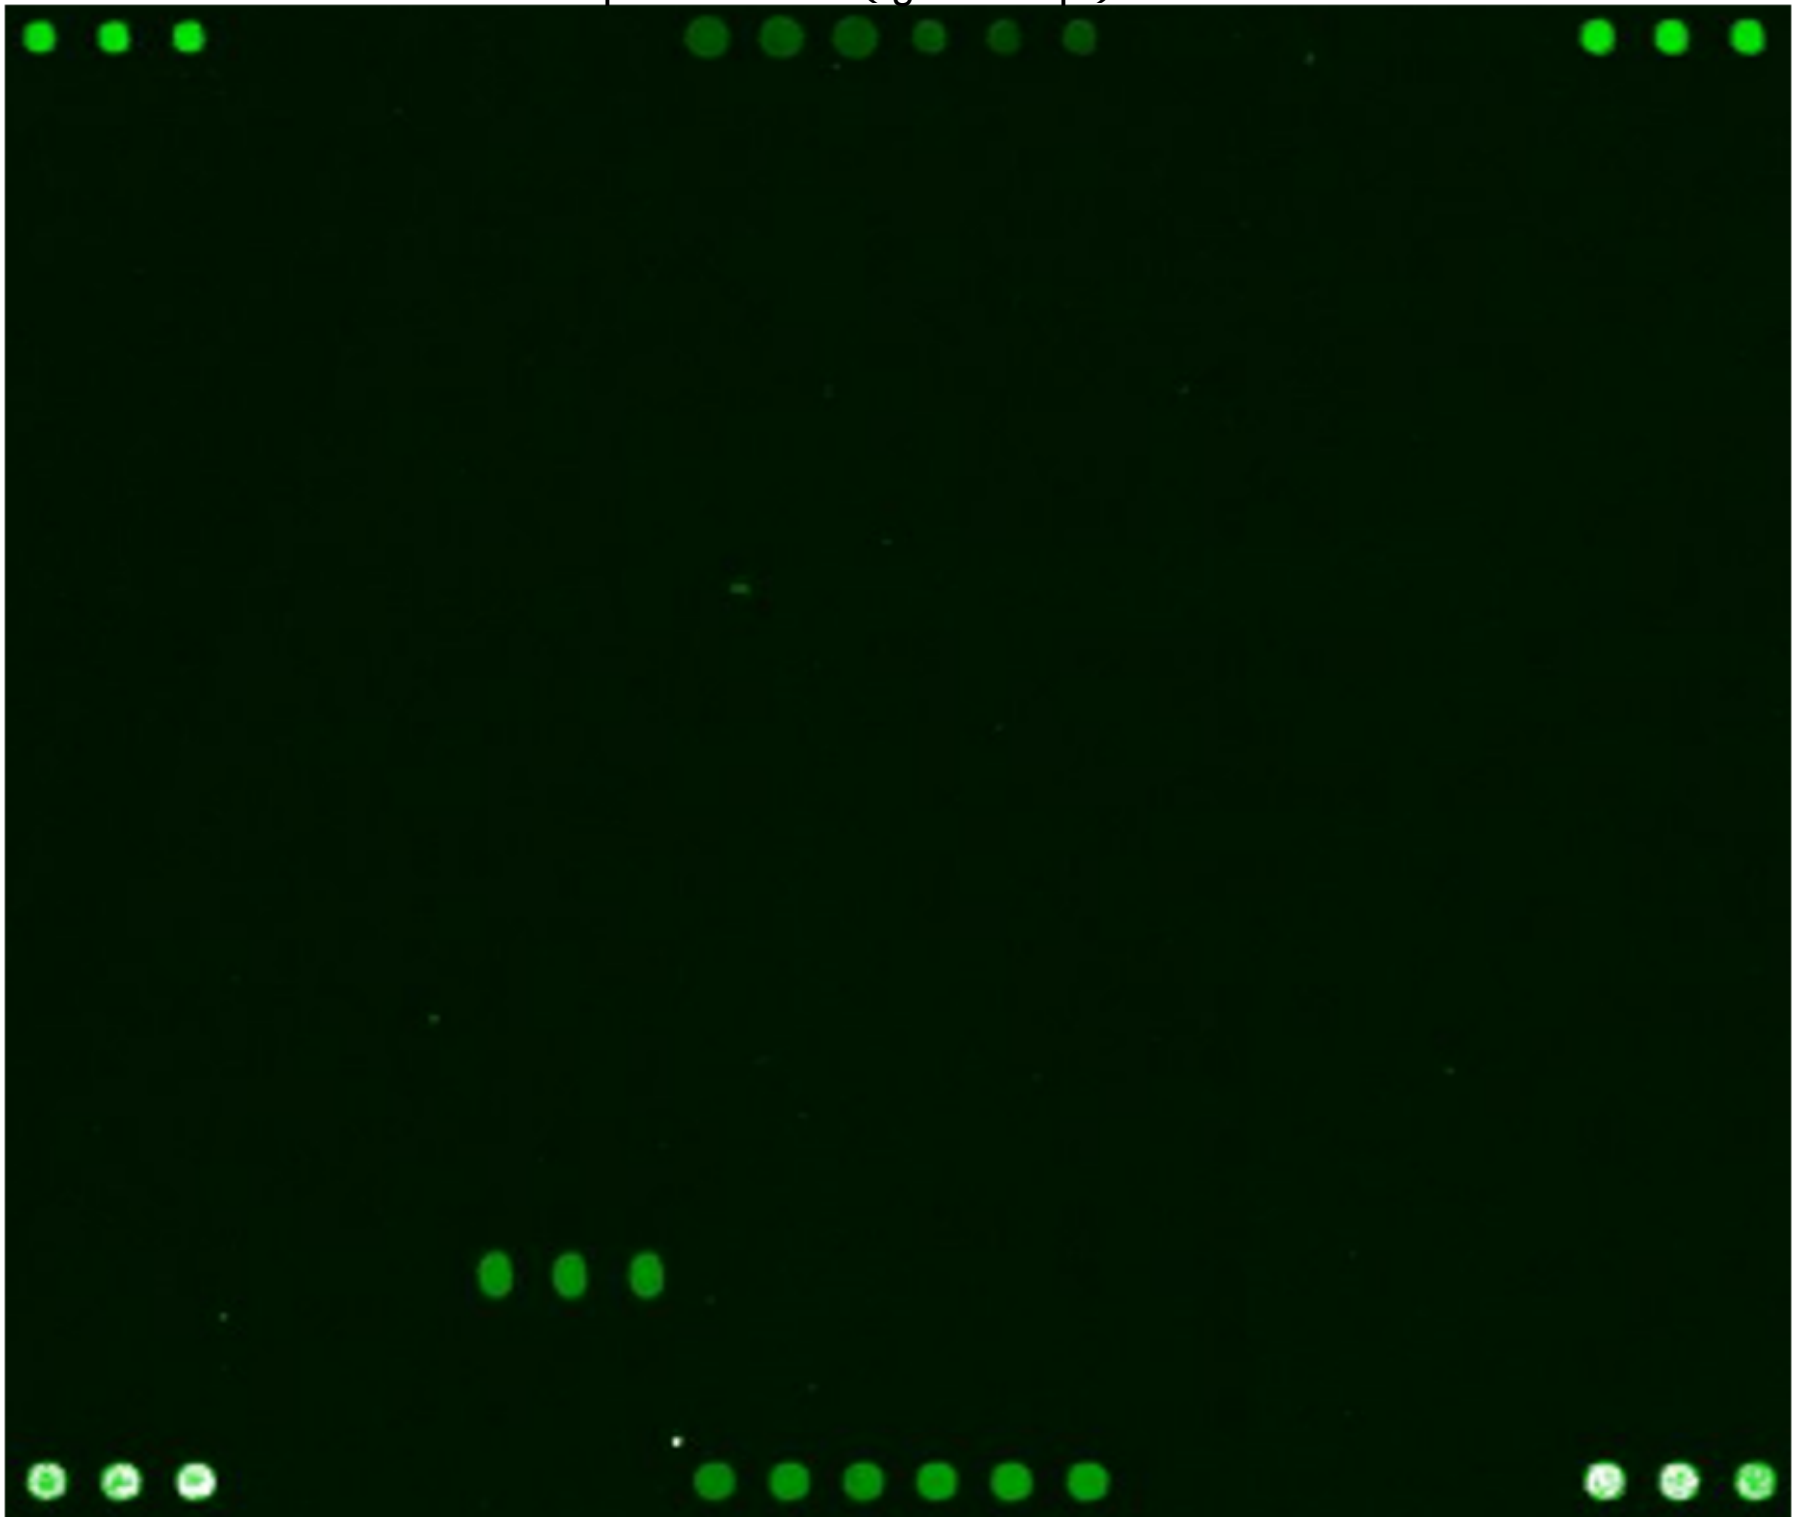

Specimen 24 ( genechip )

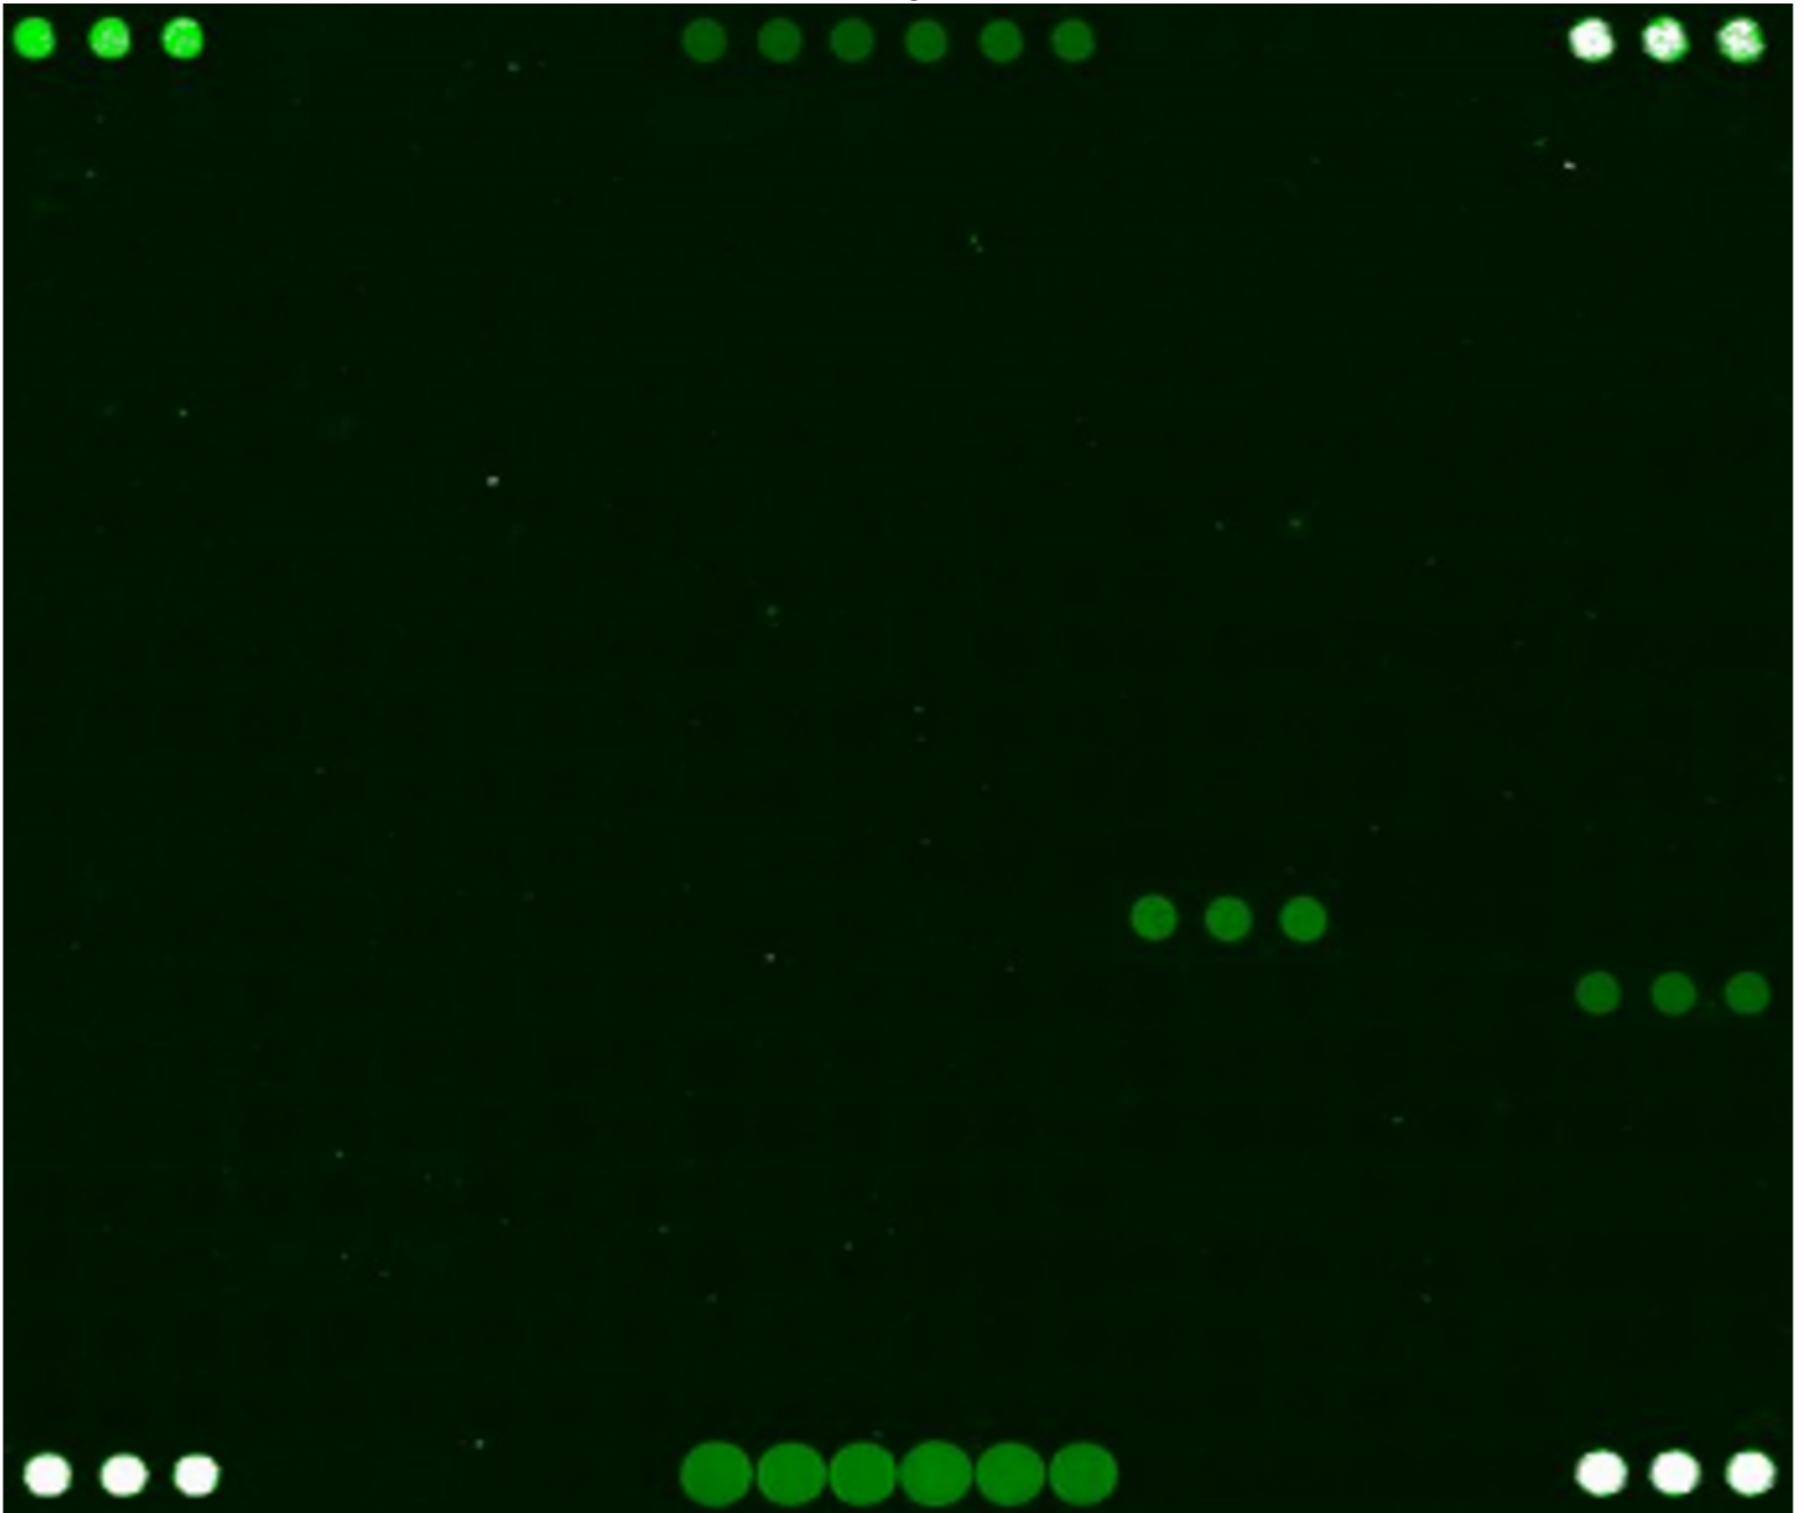

H.influenza standard strain 16s ( 2 ) N.meningitides 16s ( 3 ) and a specimen ( 4,5,6,7 )

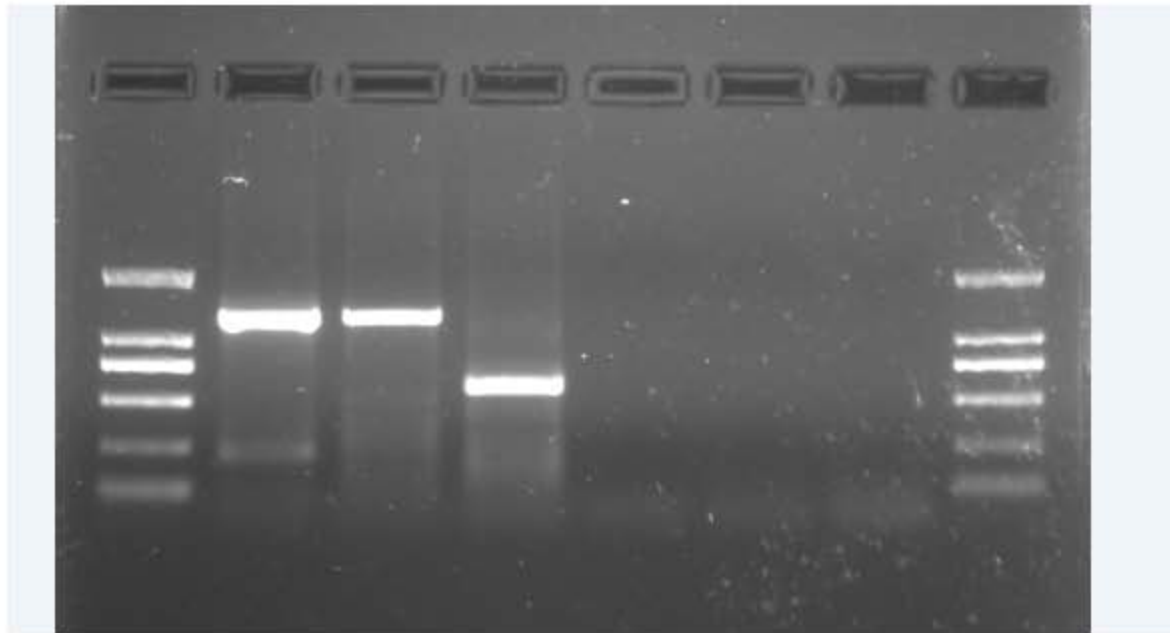

S.aureus standard strain

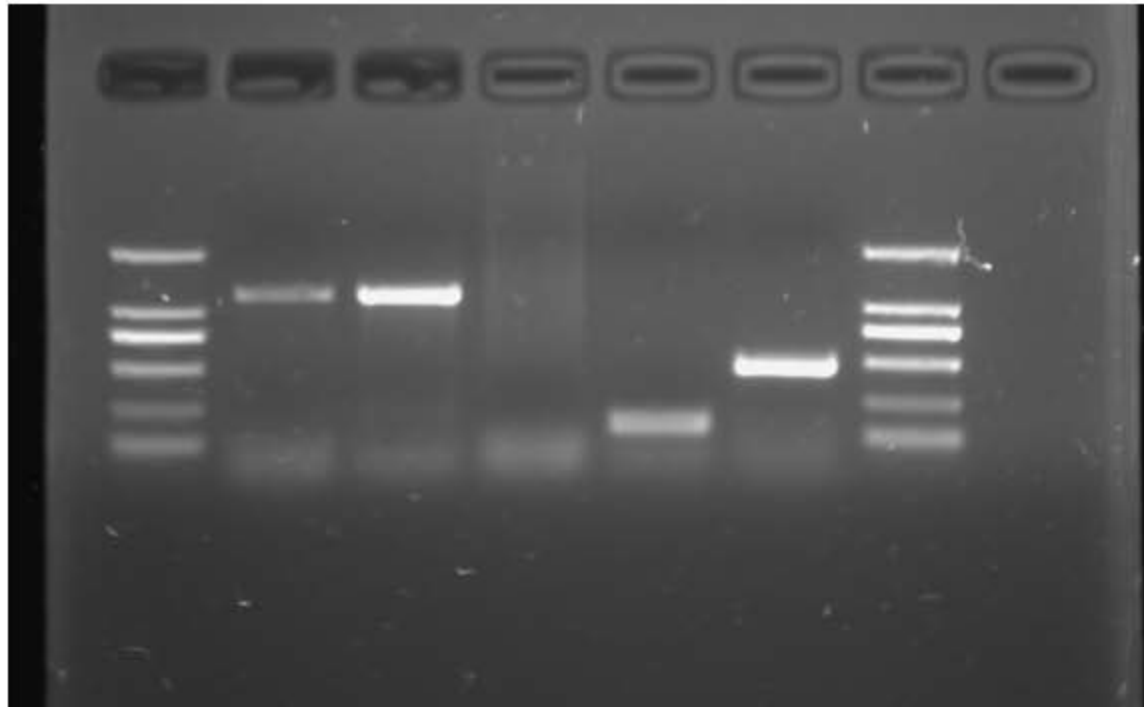

S.coli standard strain

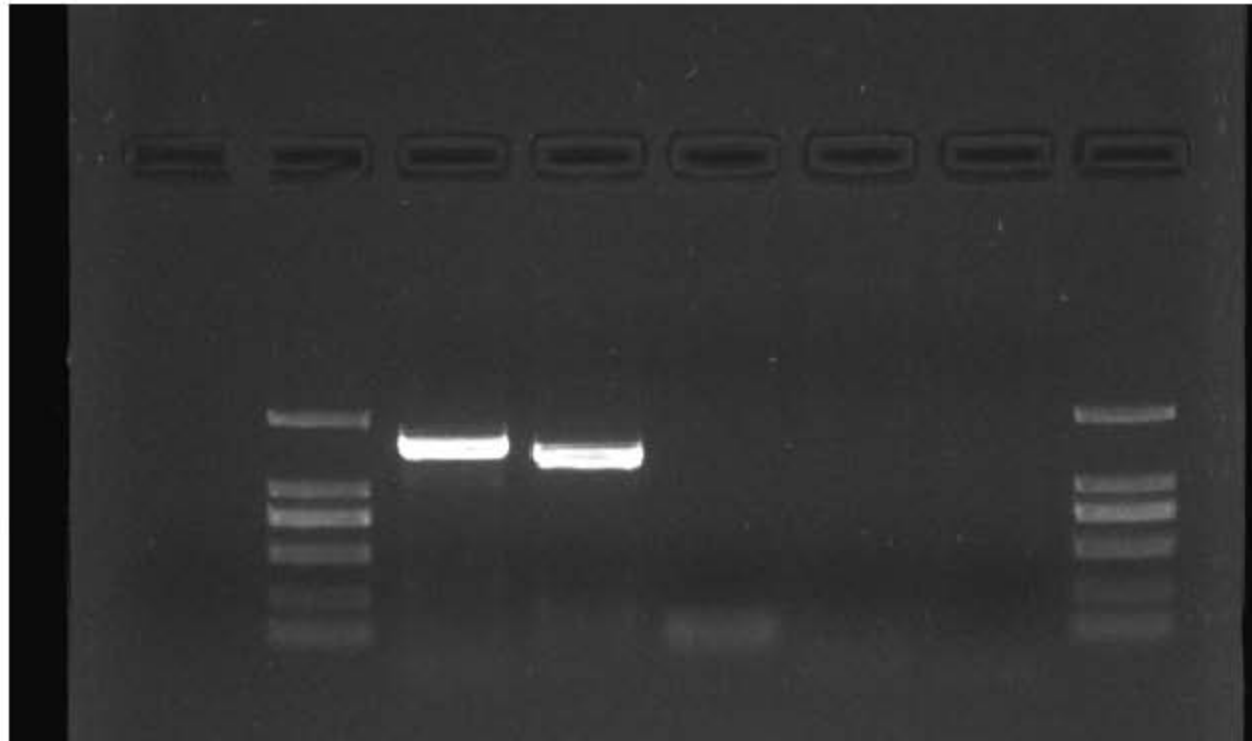



*S. epidermidis* standard strain

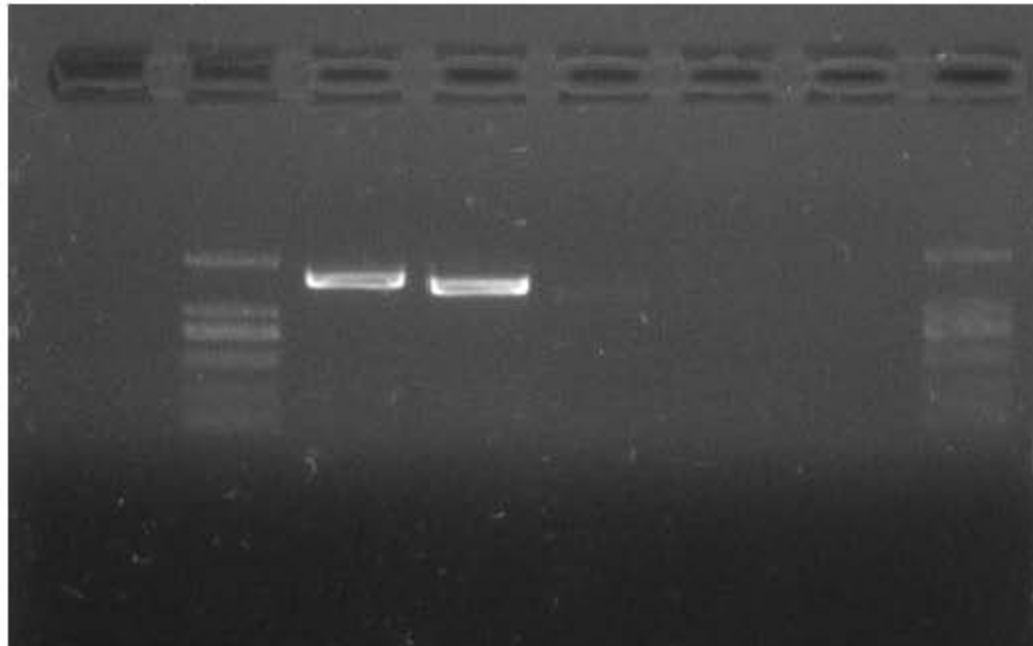

*S.pneumoniae* standard strain(left)and other specimen(right)

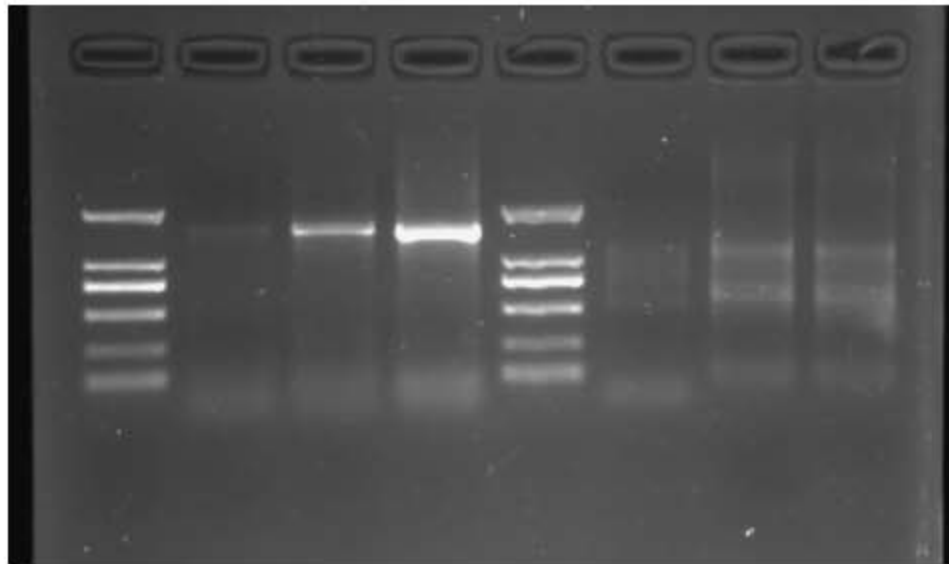

Specimen 5 ( gel image )

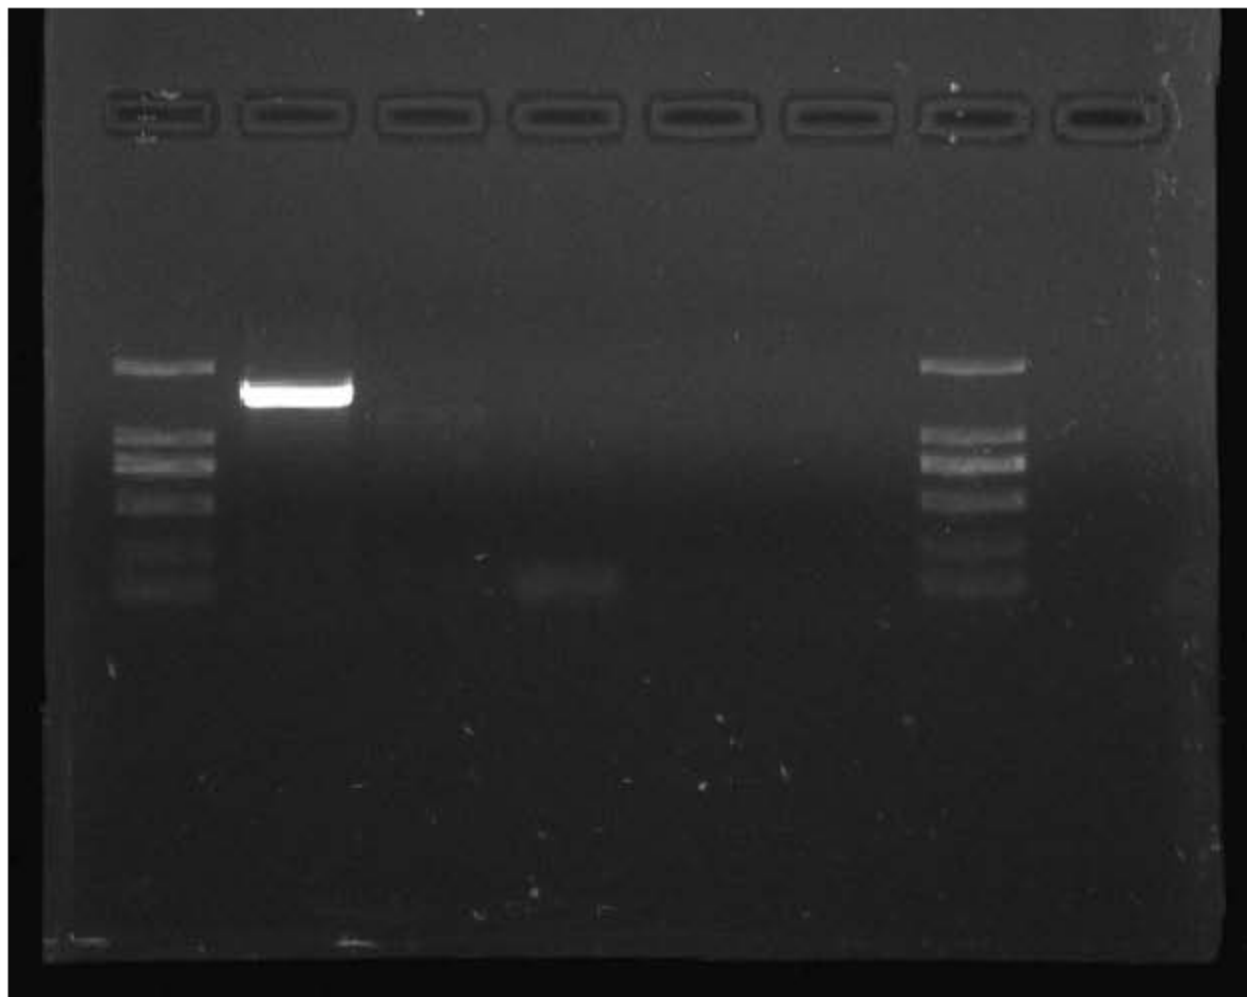

Specimen 13 ( gel image )

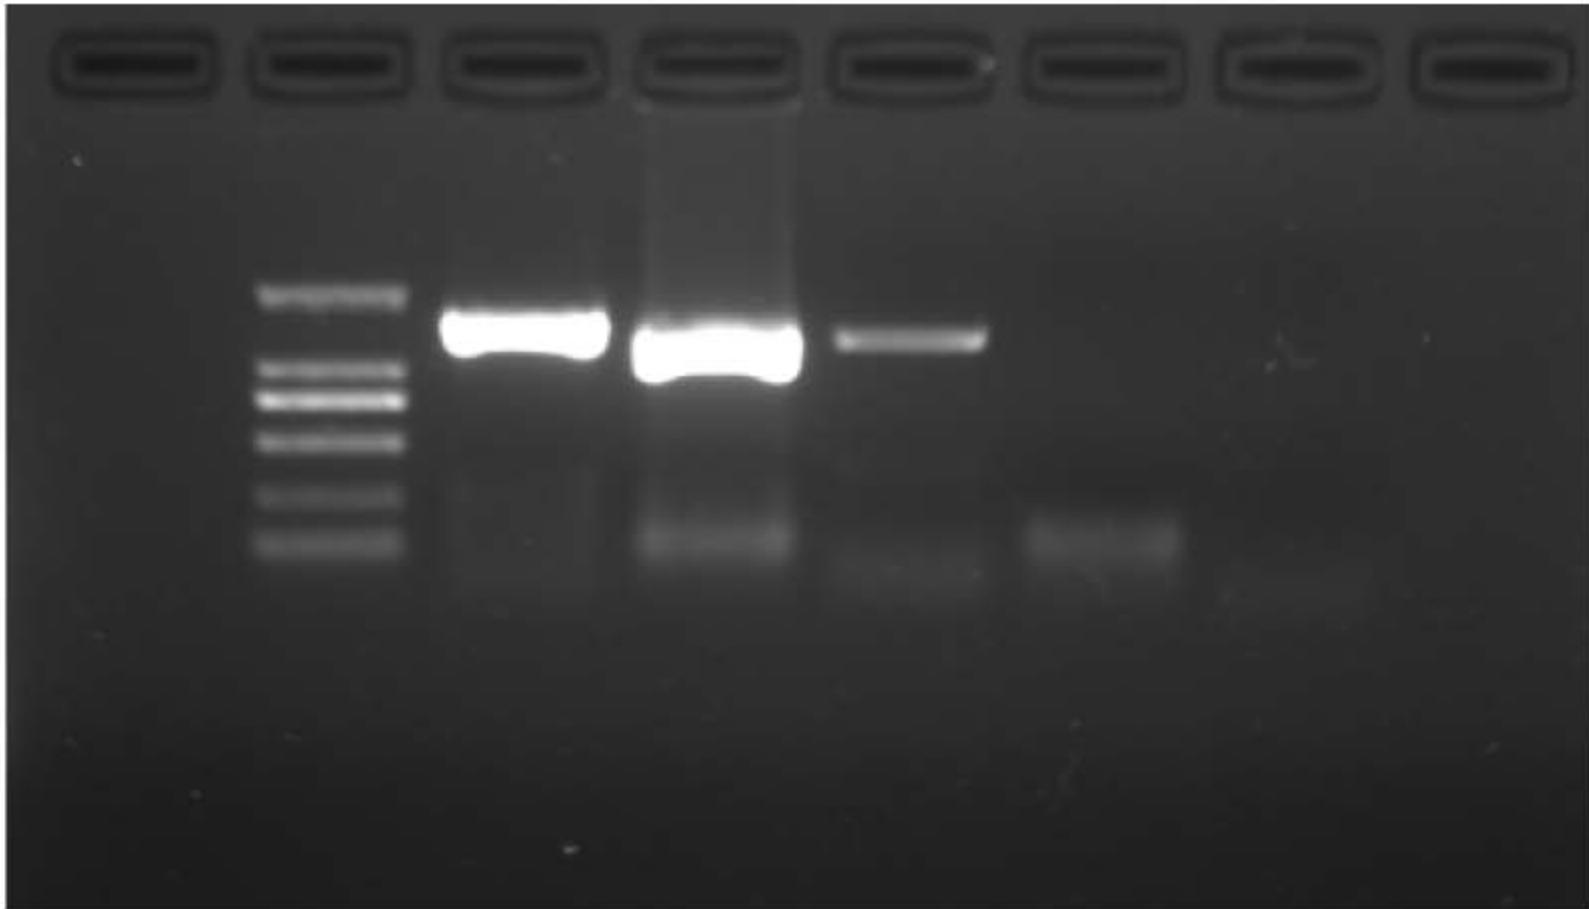

NC Specimen 1

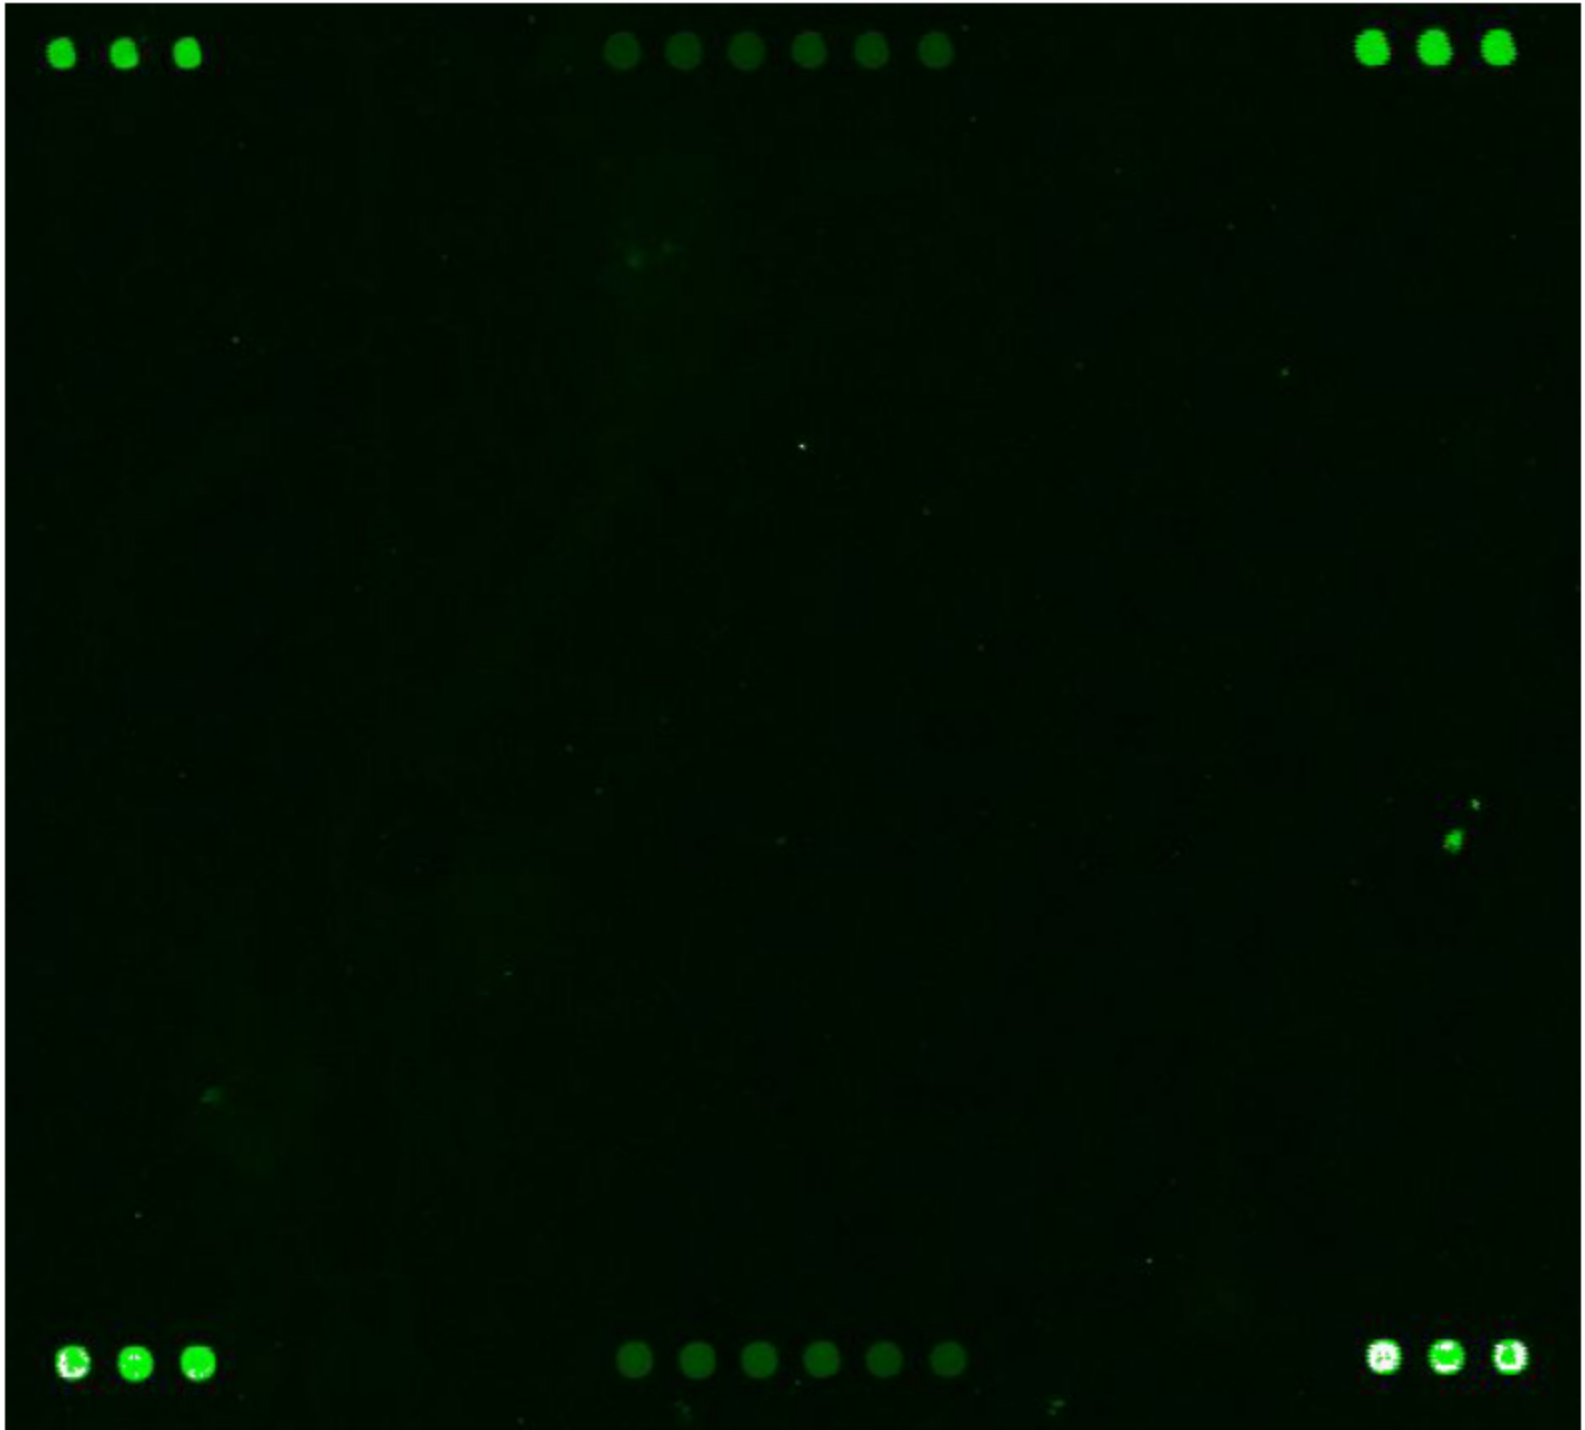

NC Specimen 2

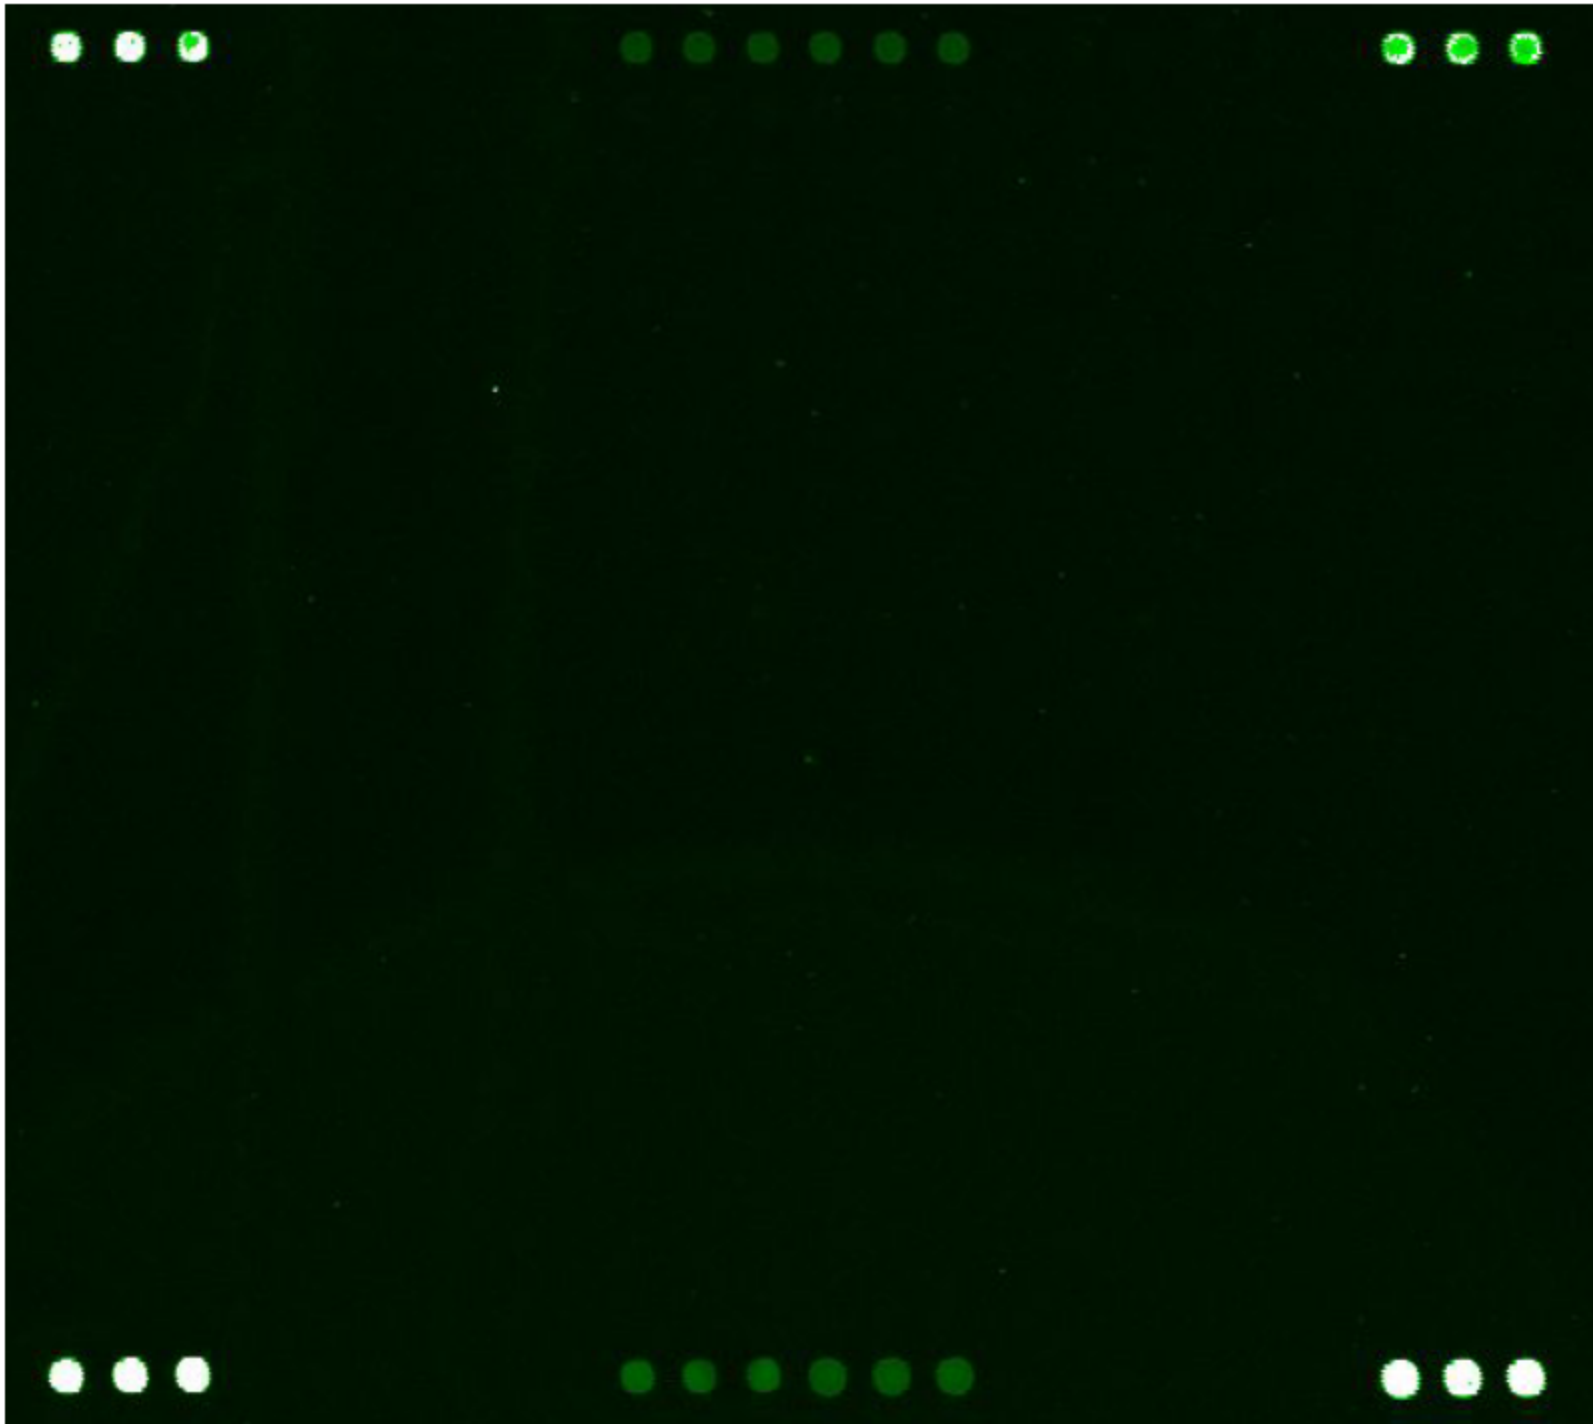

NC Specimen 3

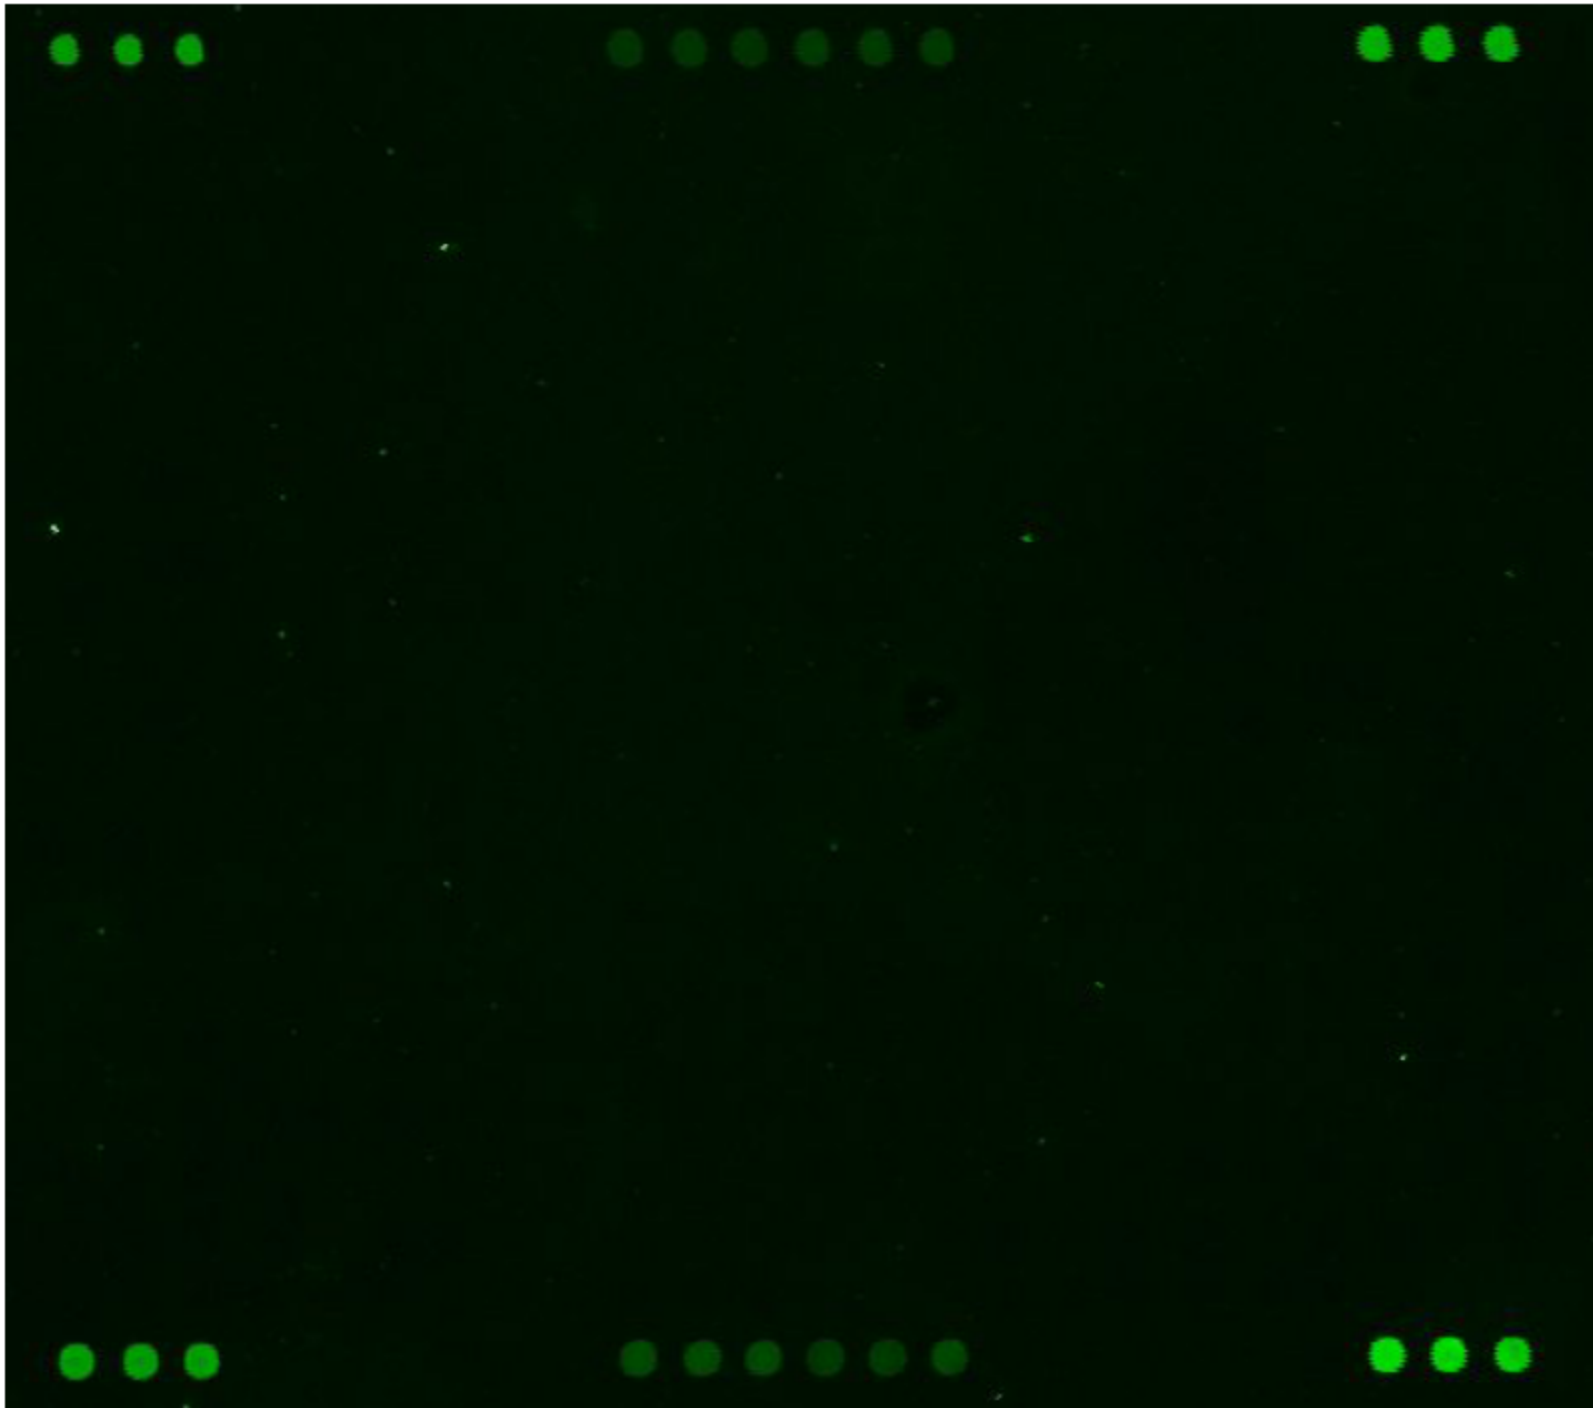

NC Specimen 4

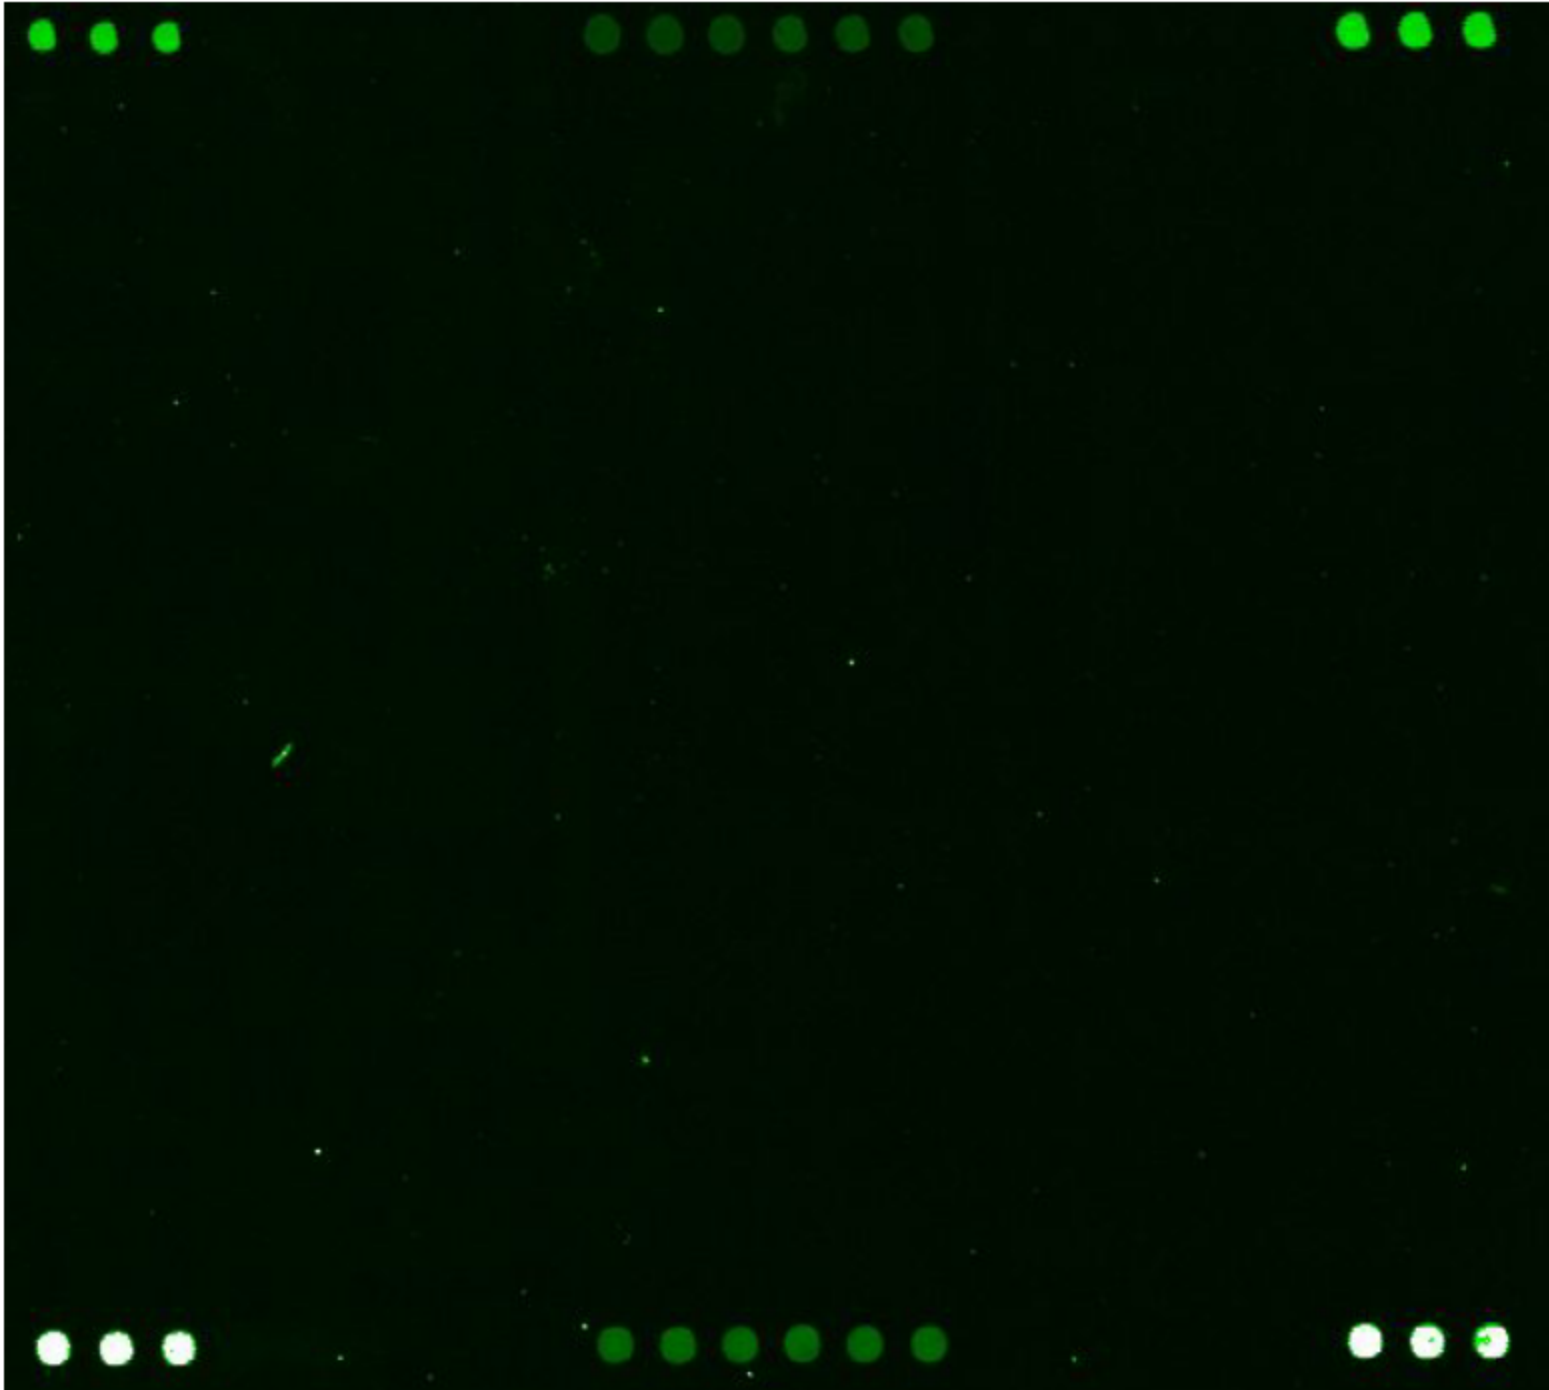



NC Specimen 5

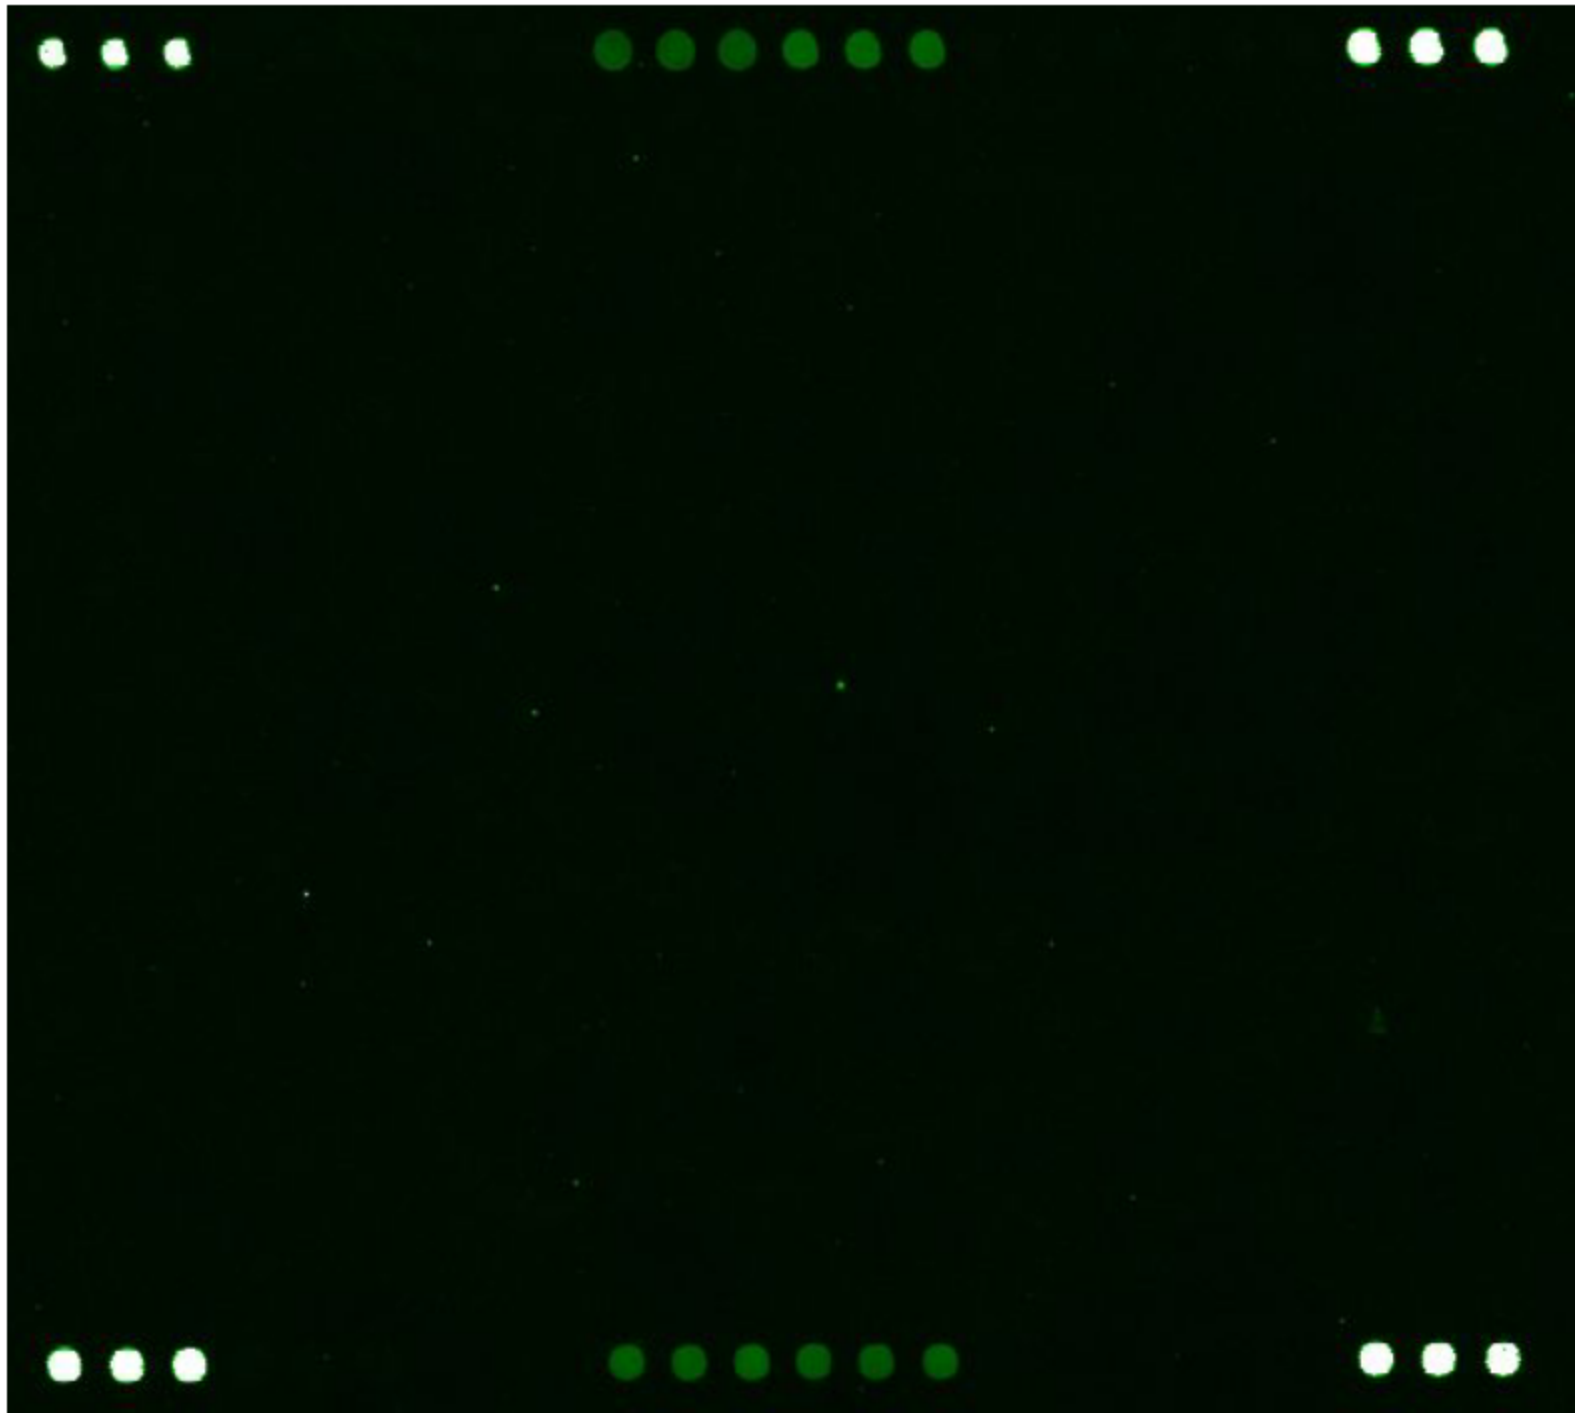

NC Specimen 6

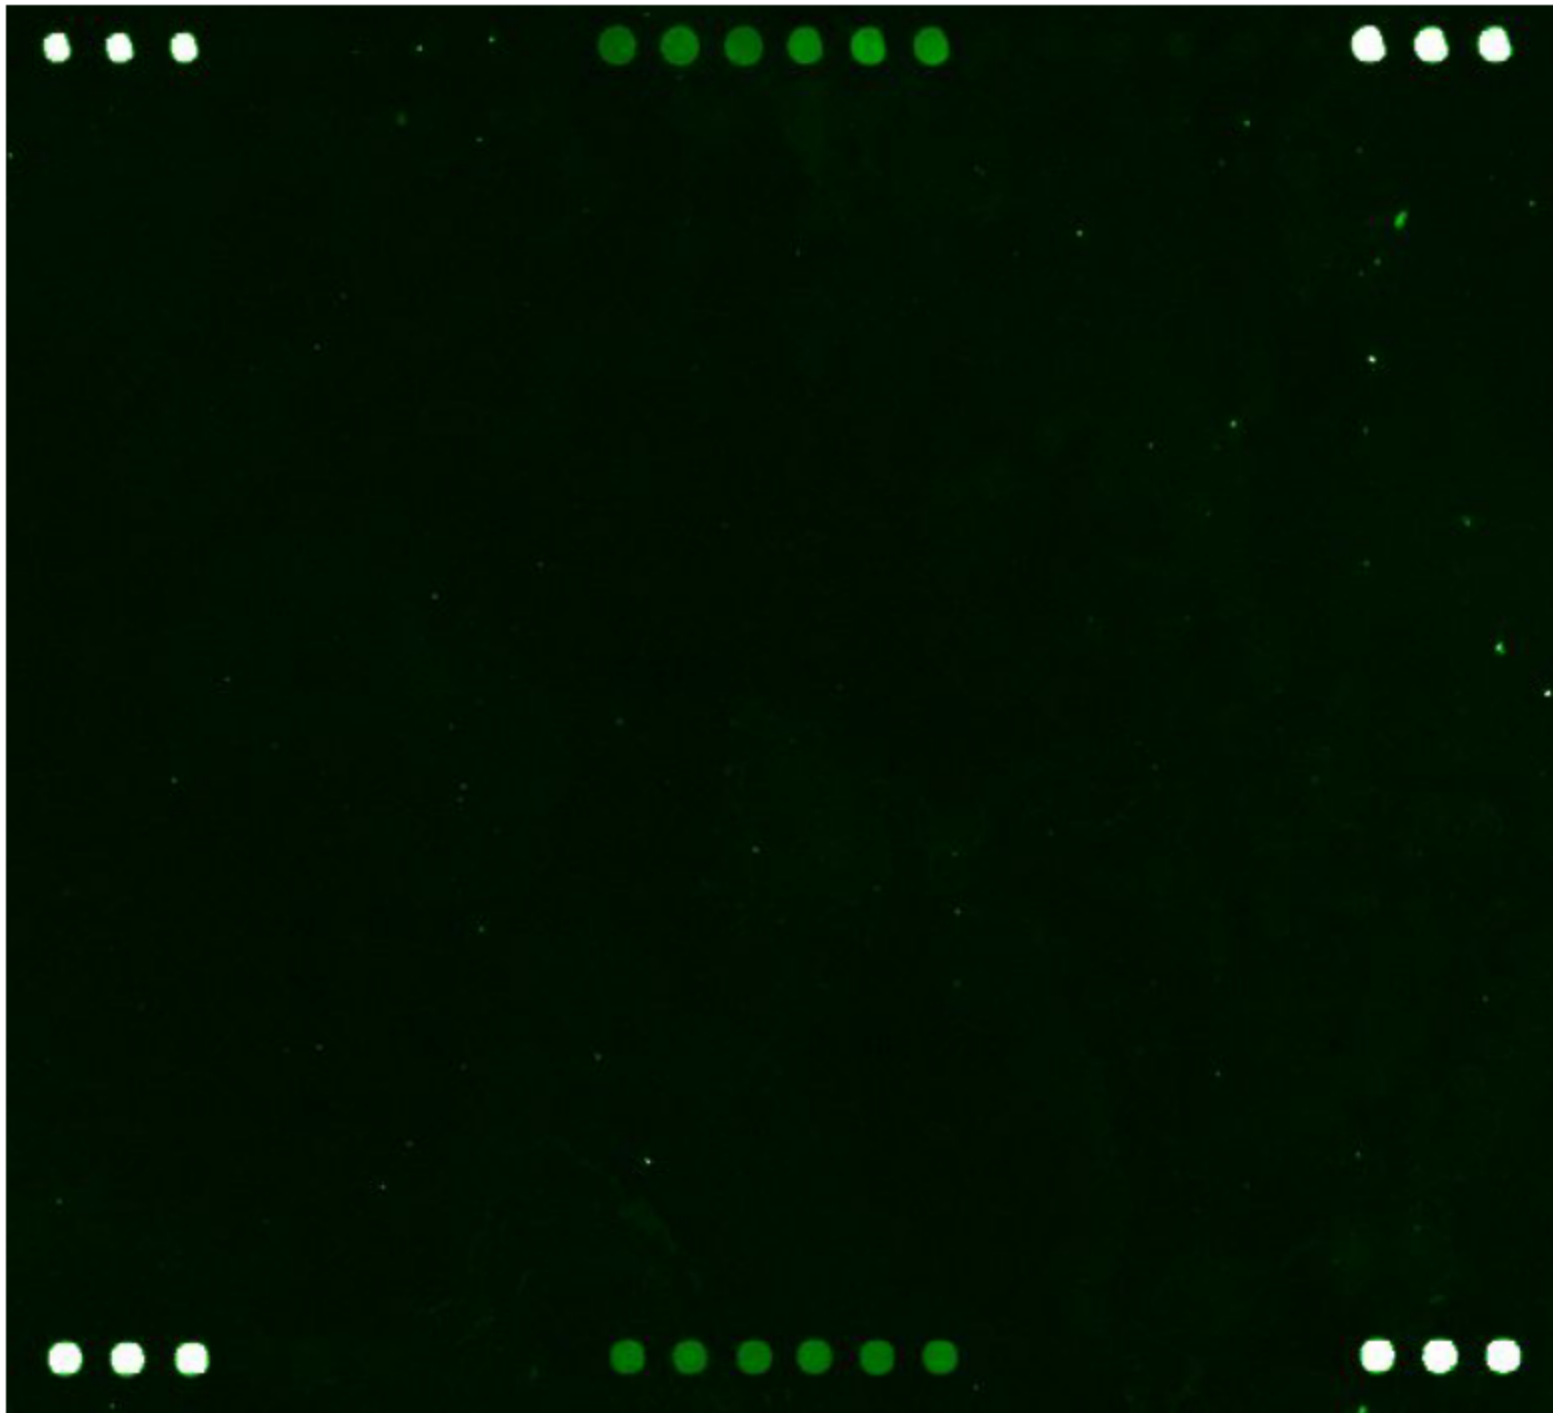

NC Specimen 7

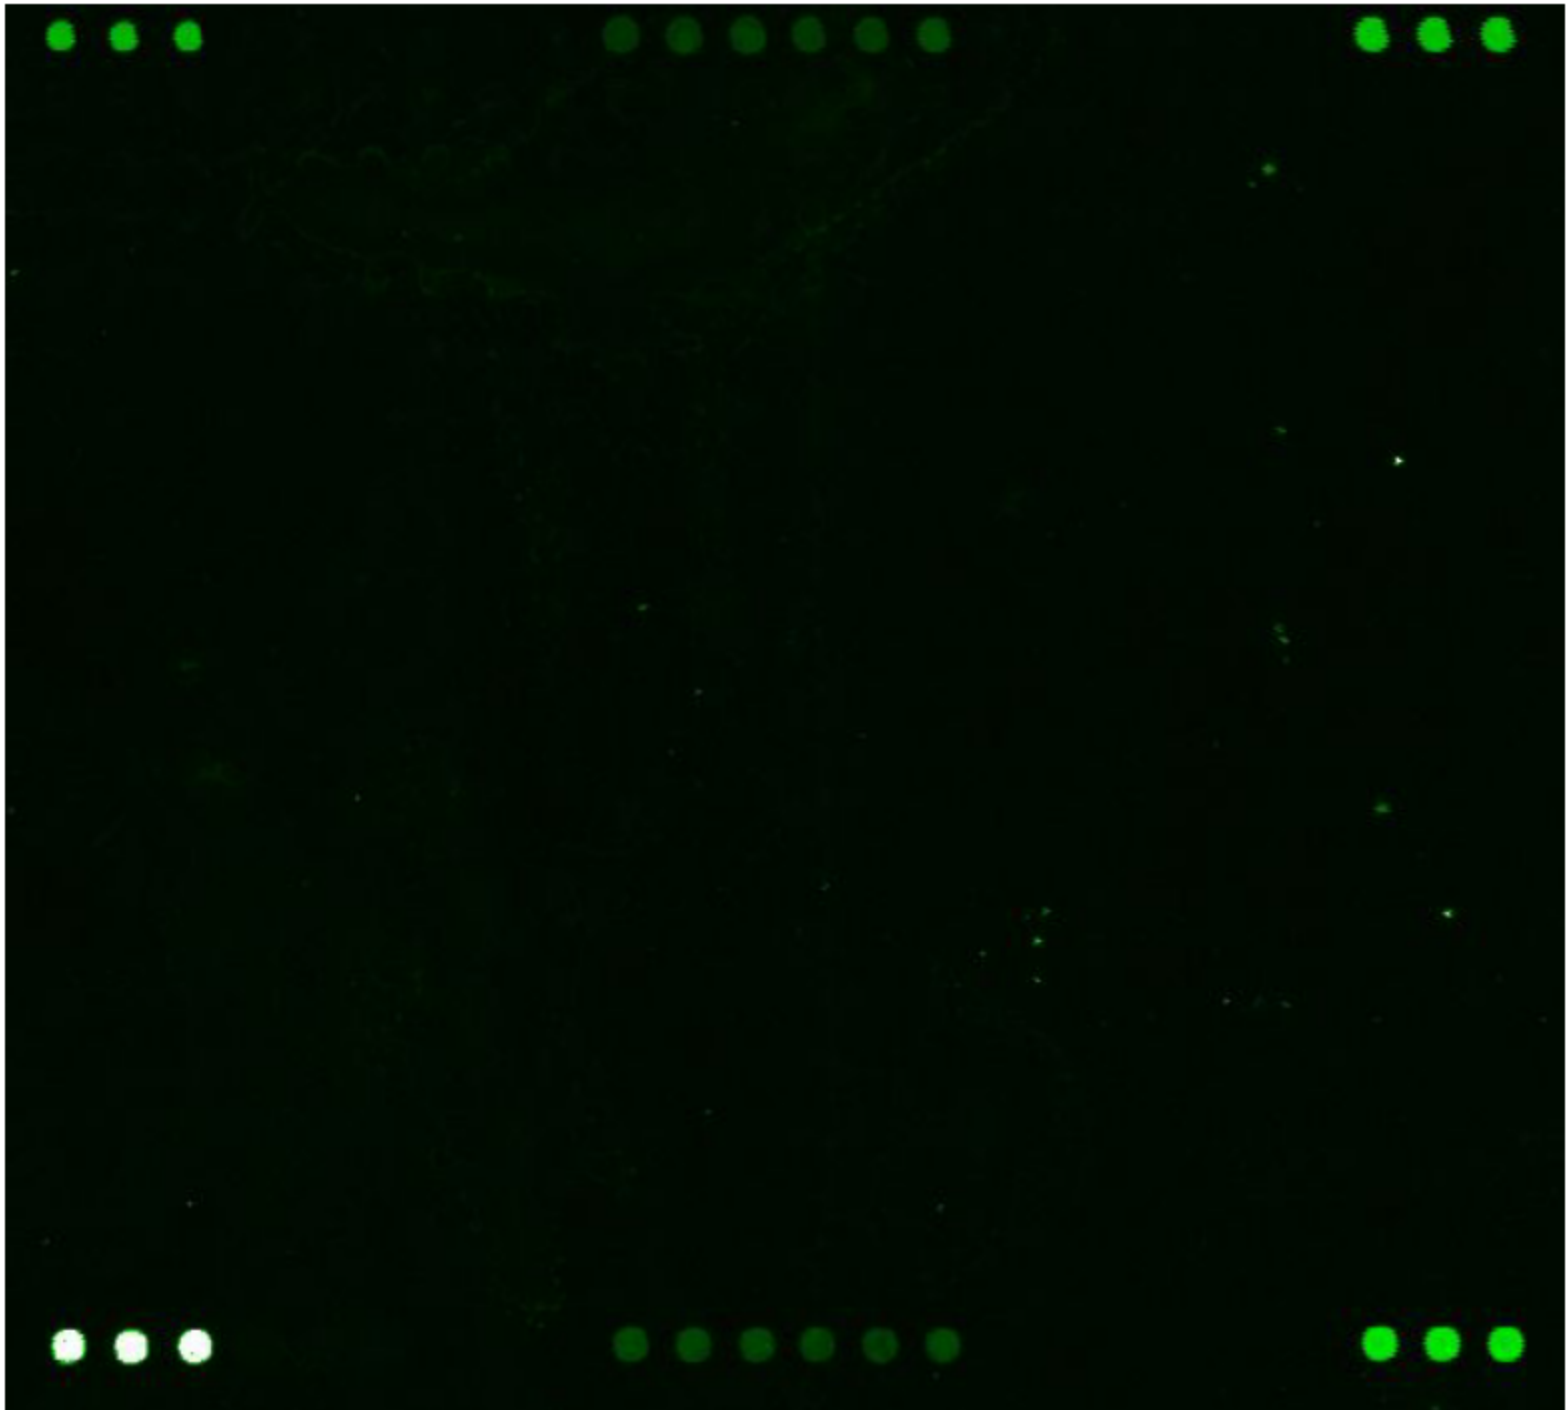

NC Specimen 8

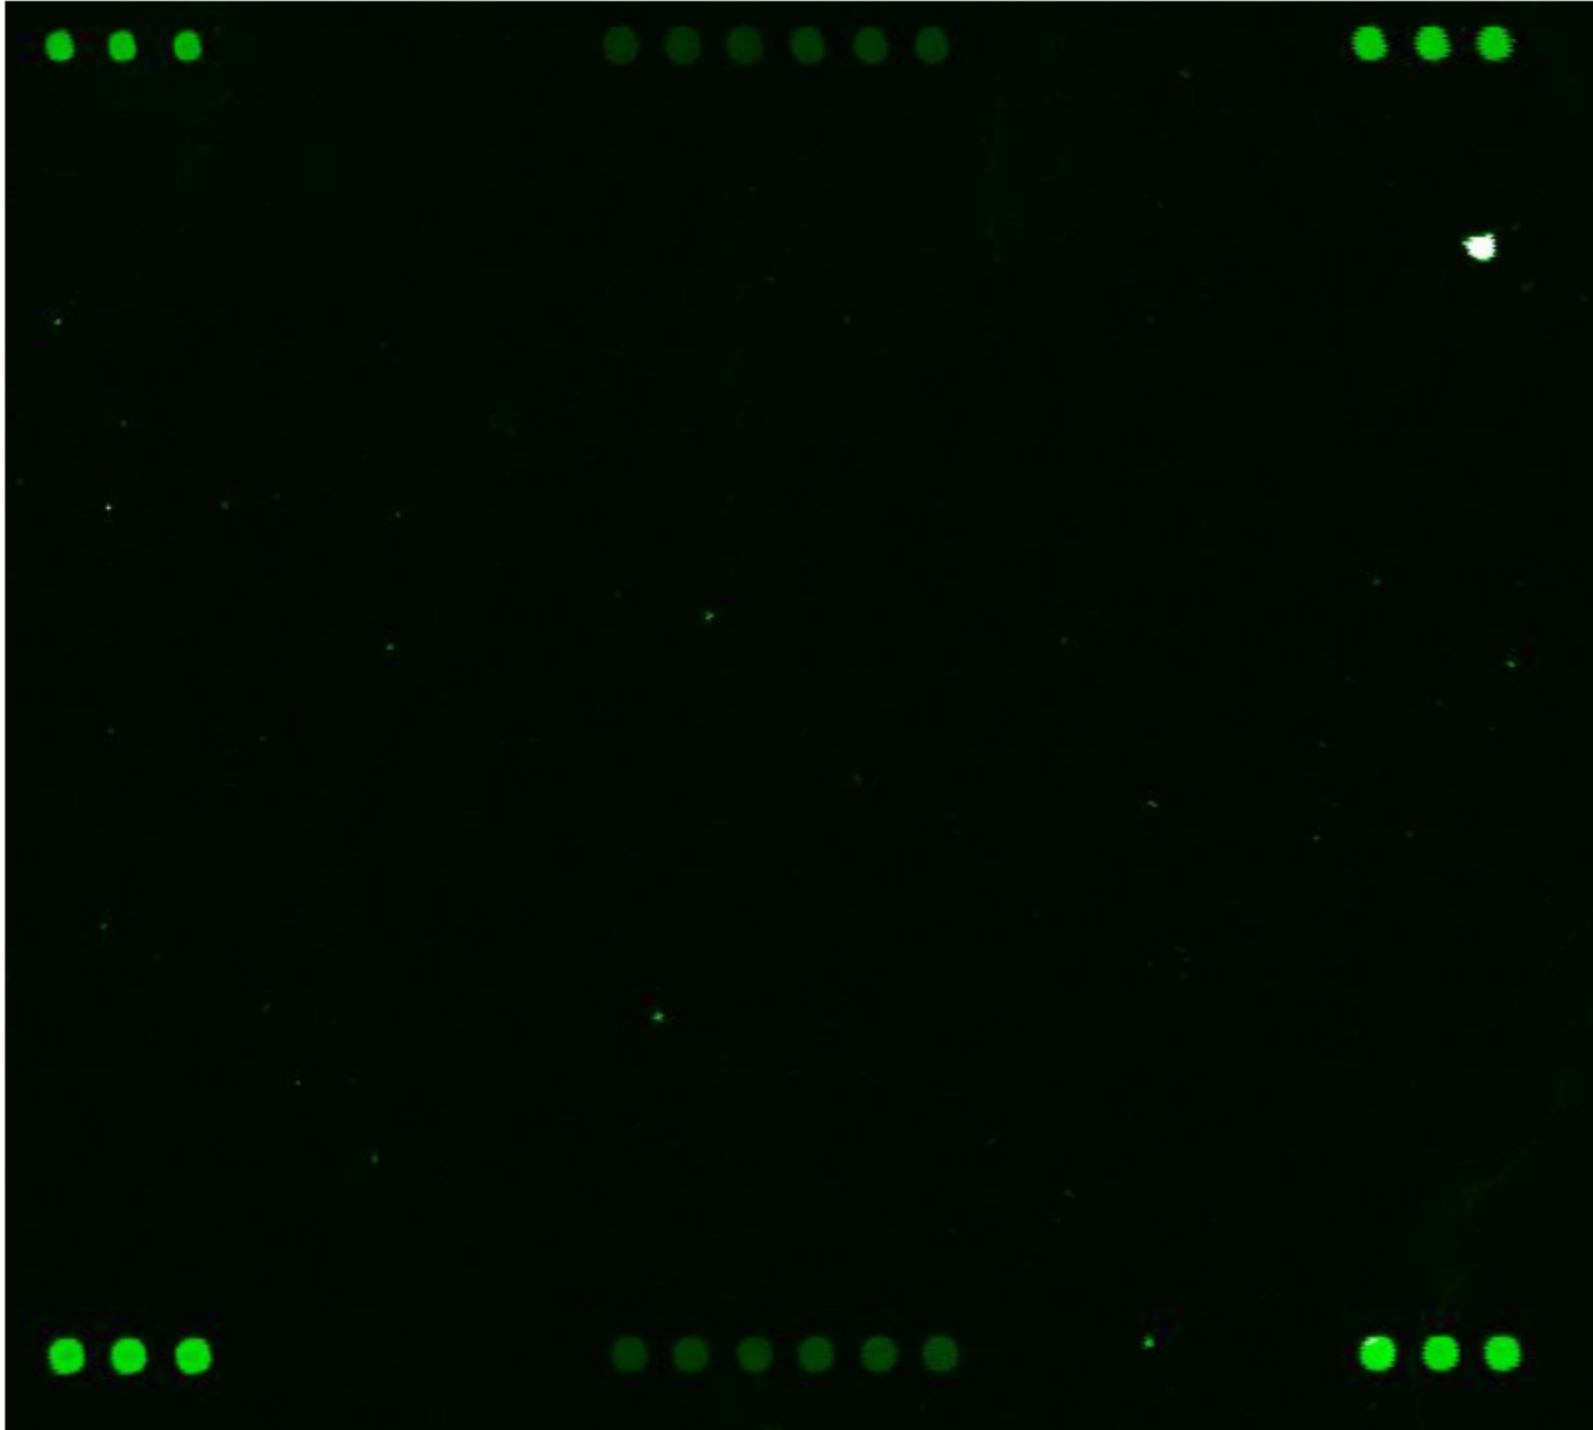

NC Specimen 9

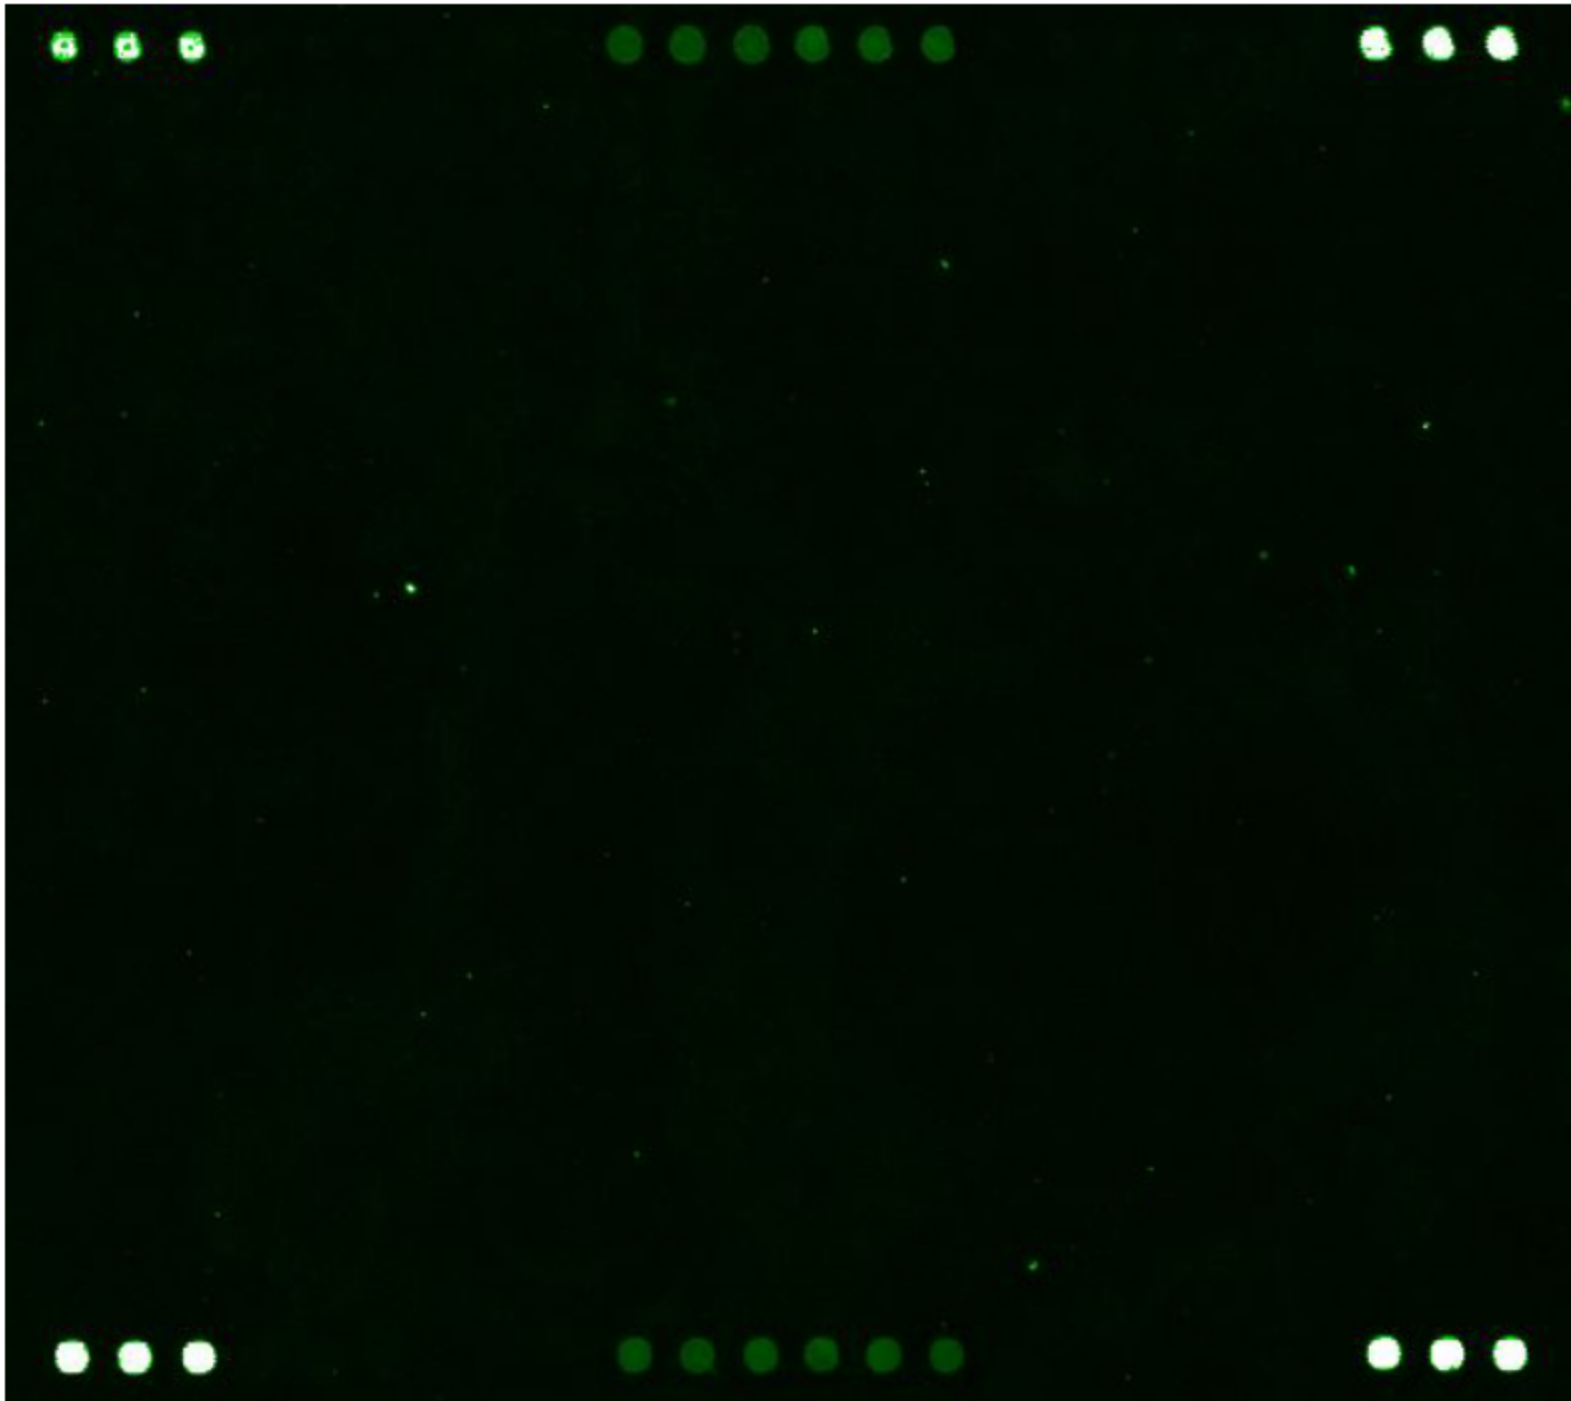

NC Specimen 10

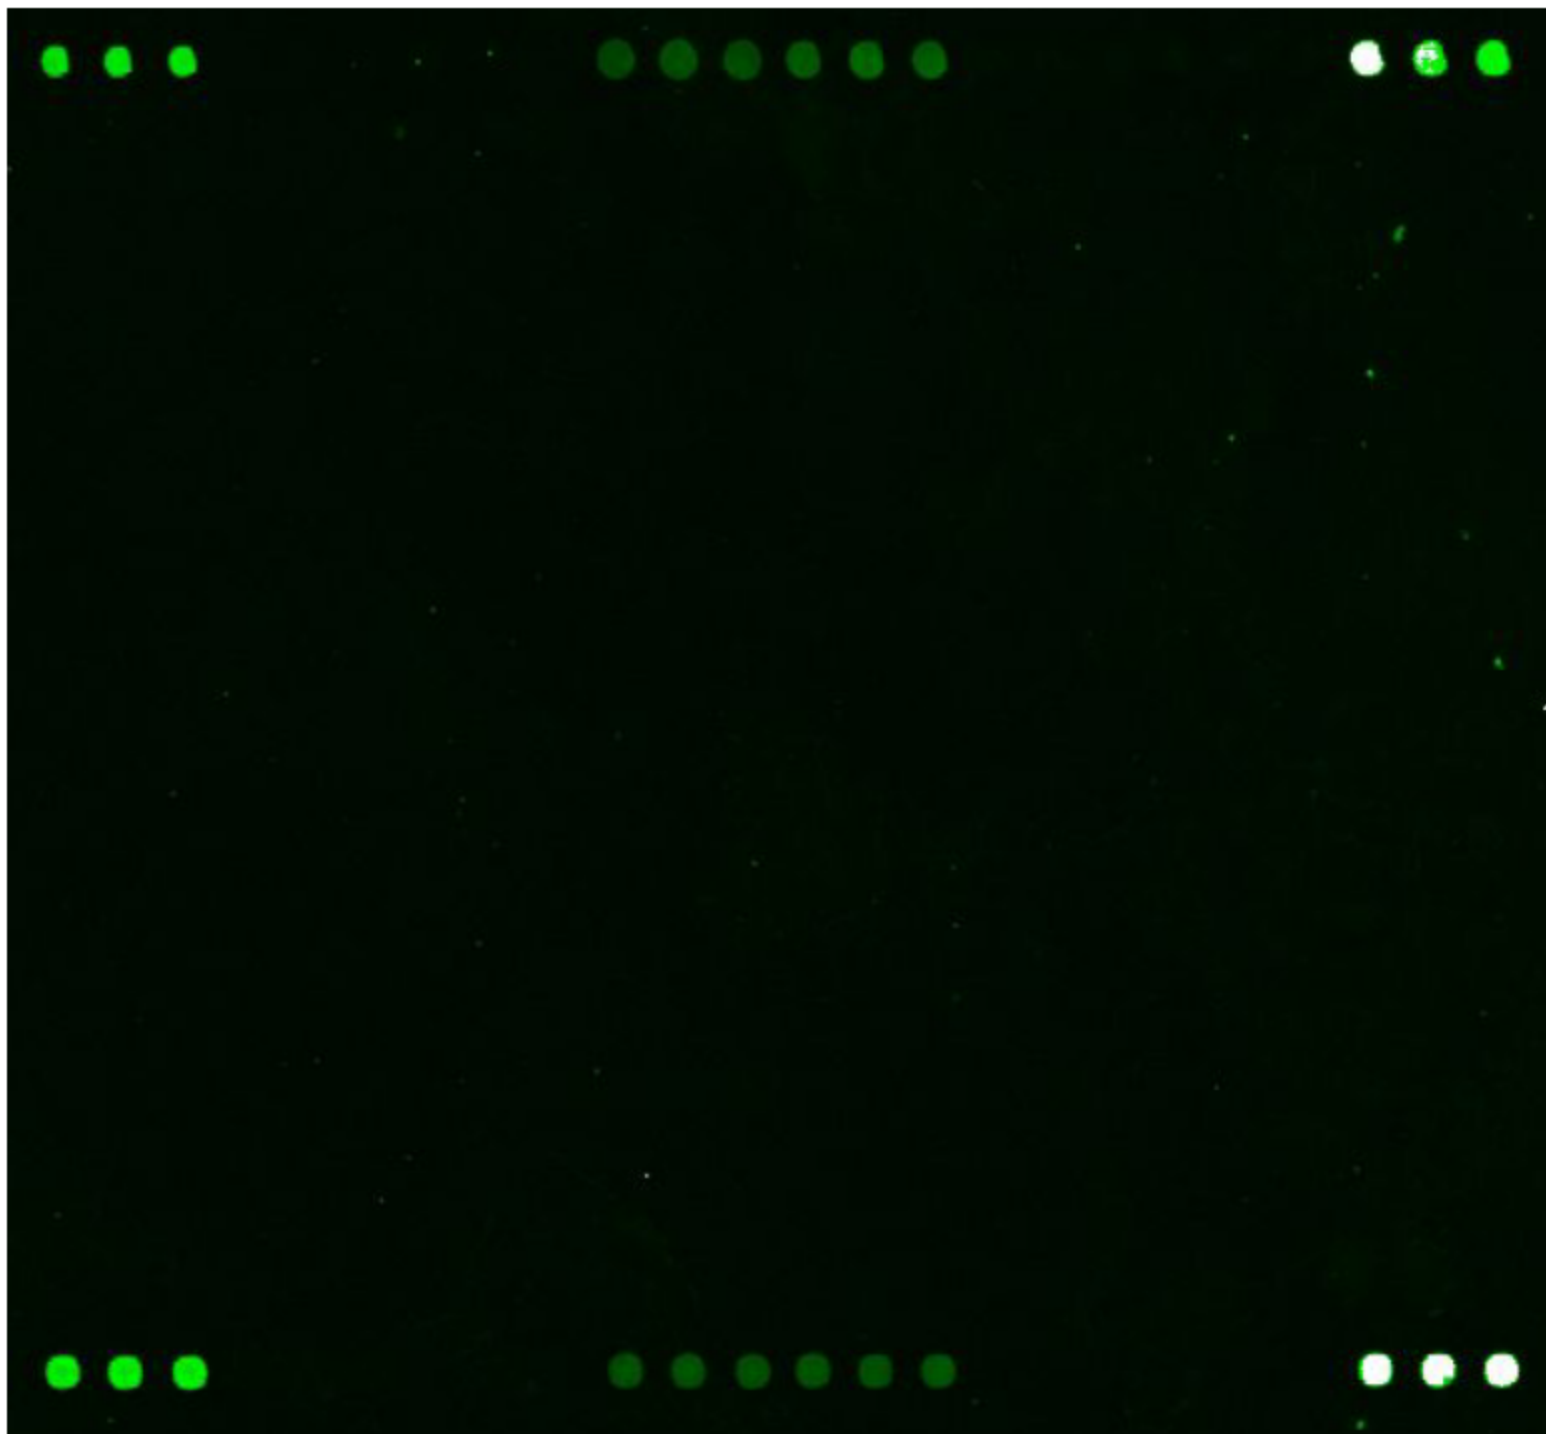

NC Specimen 11

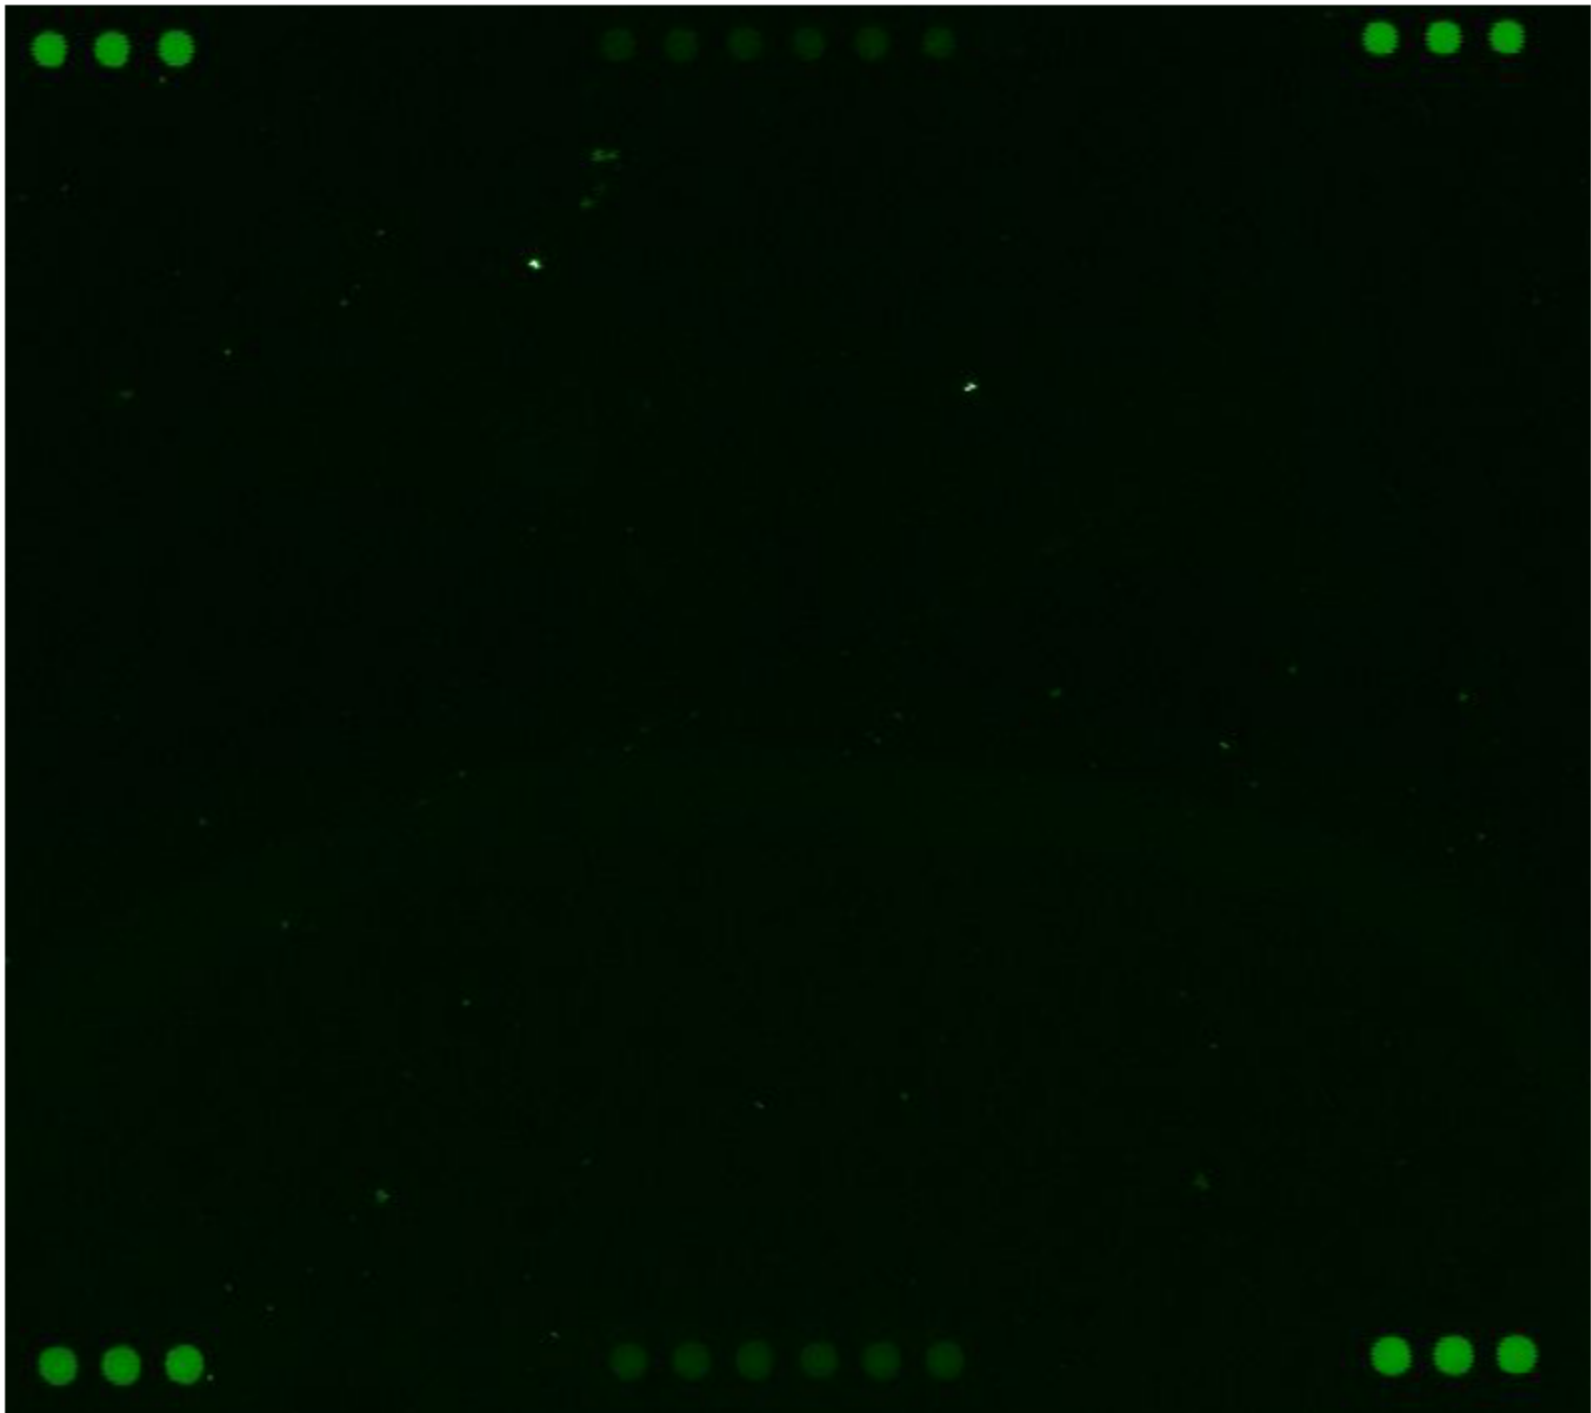

NC Specimen 12

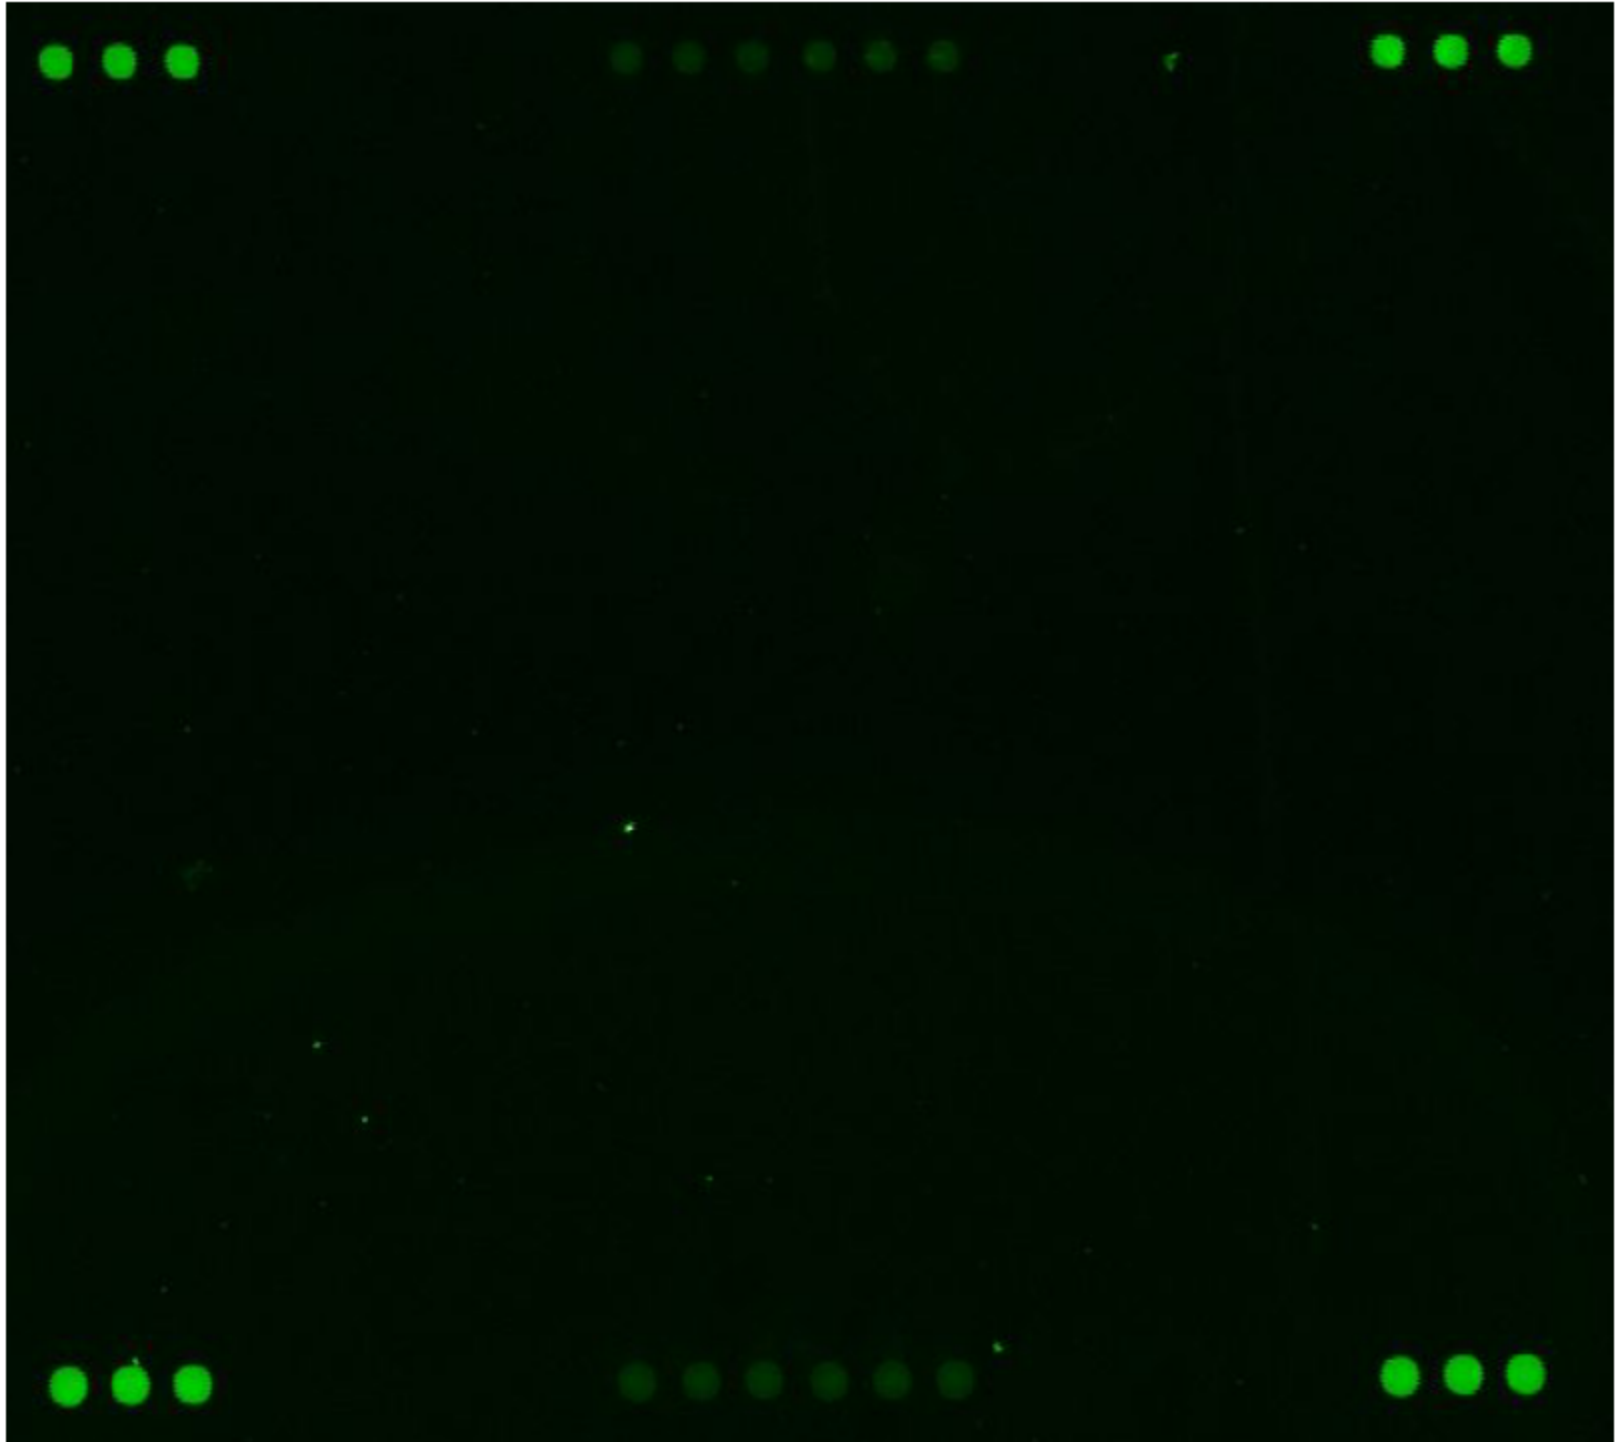



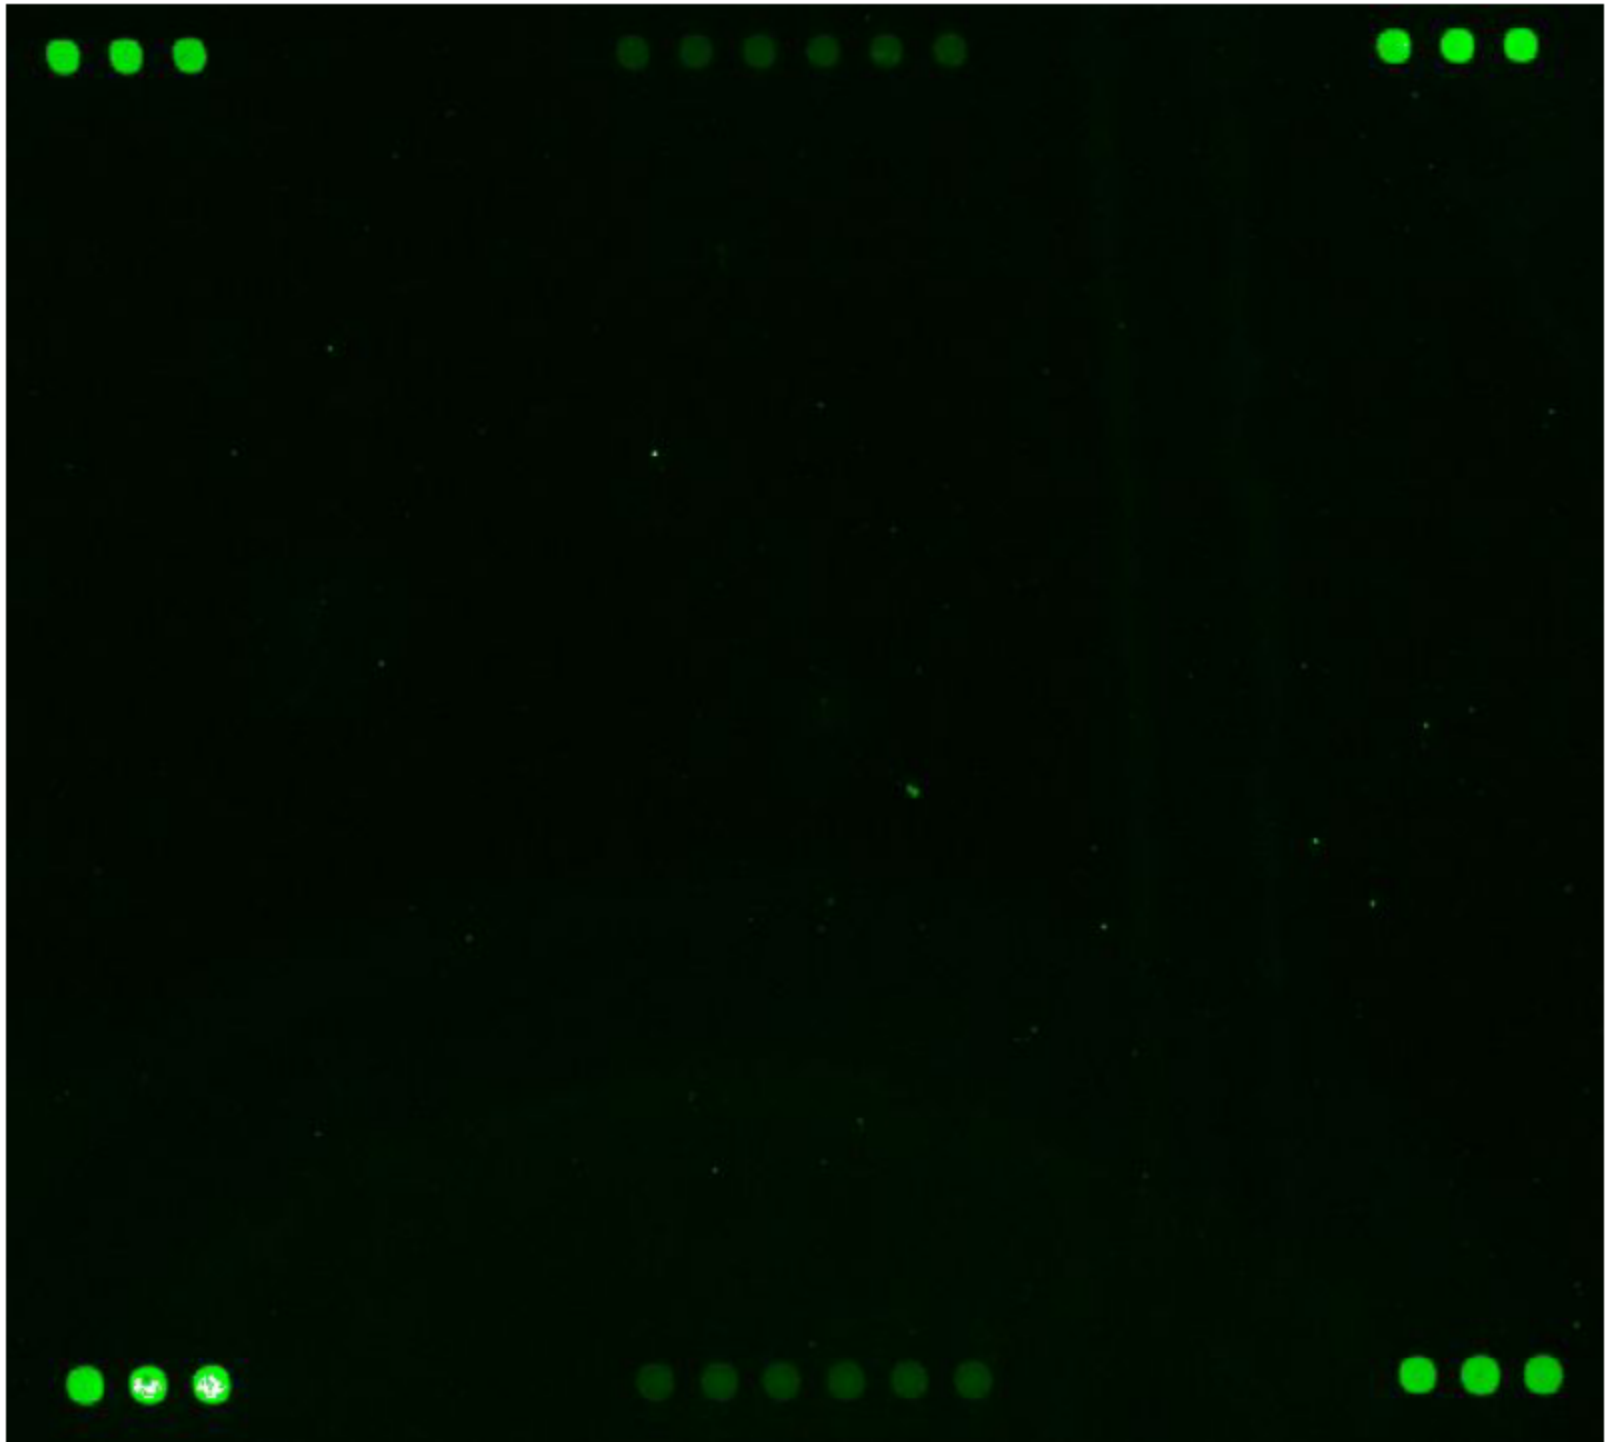

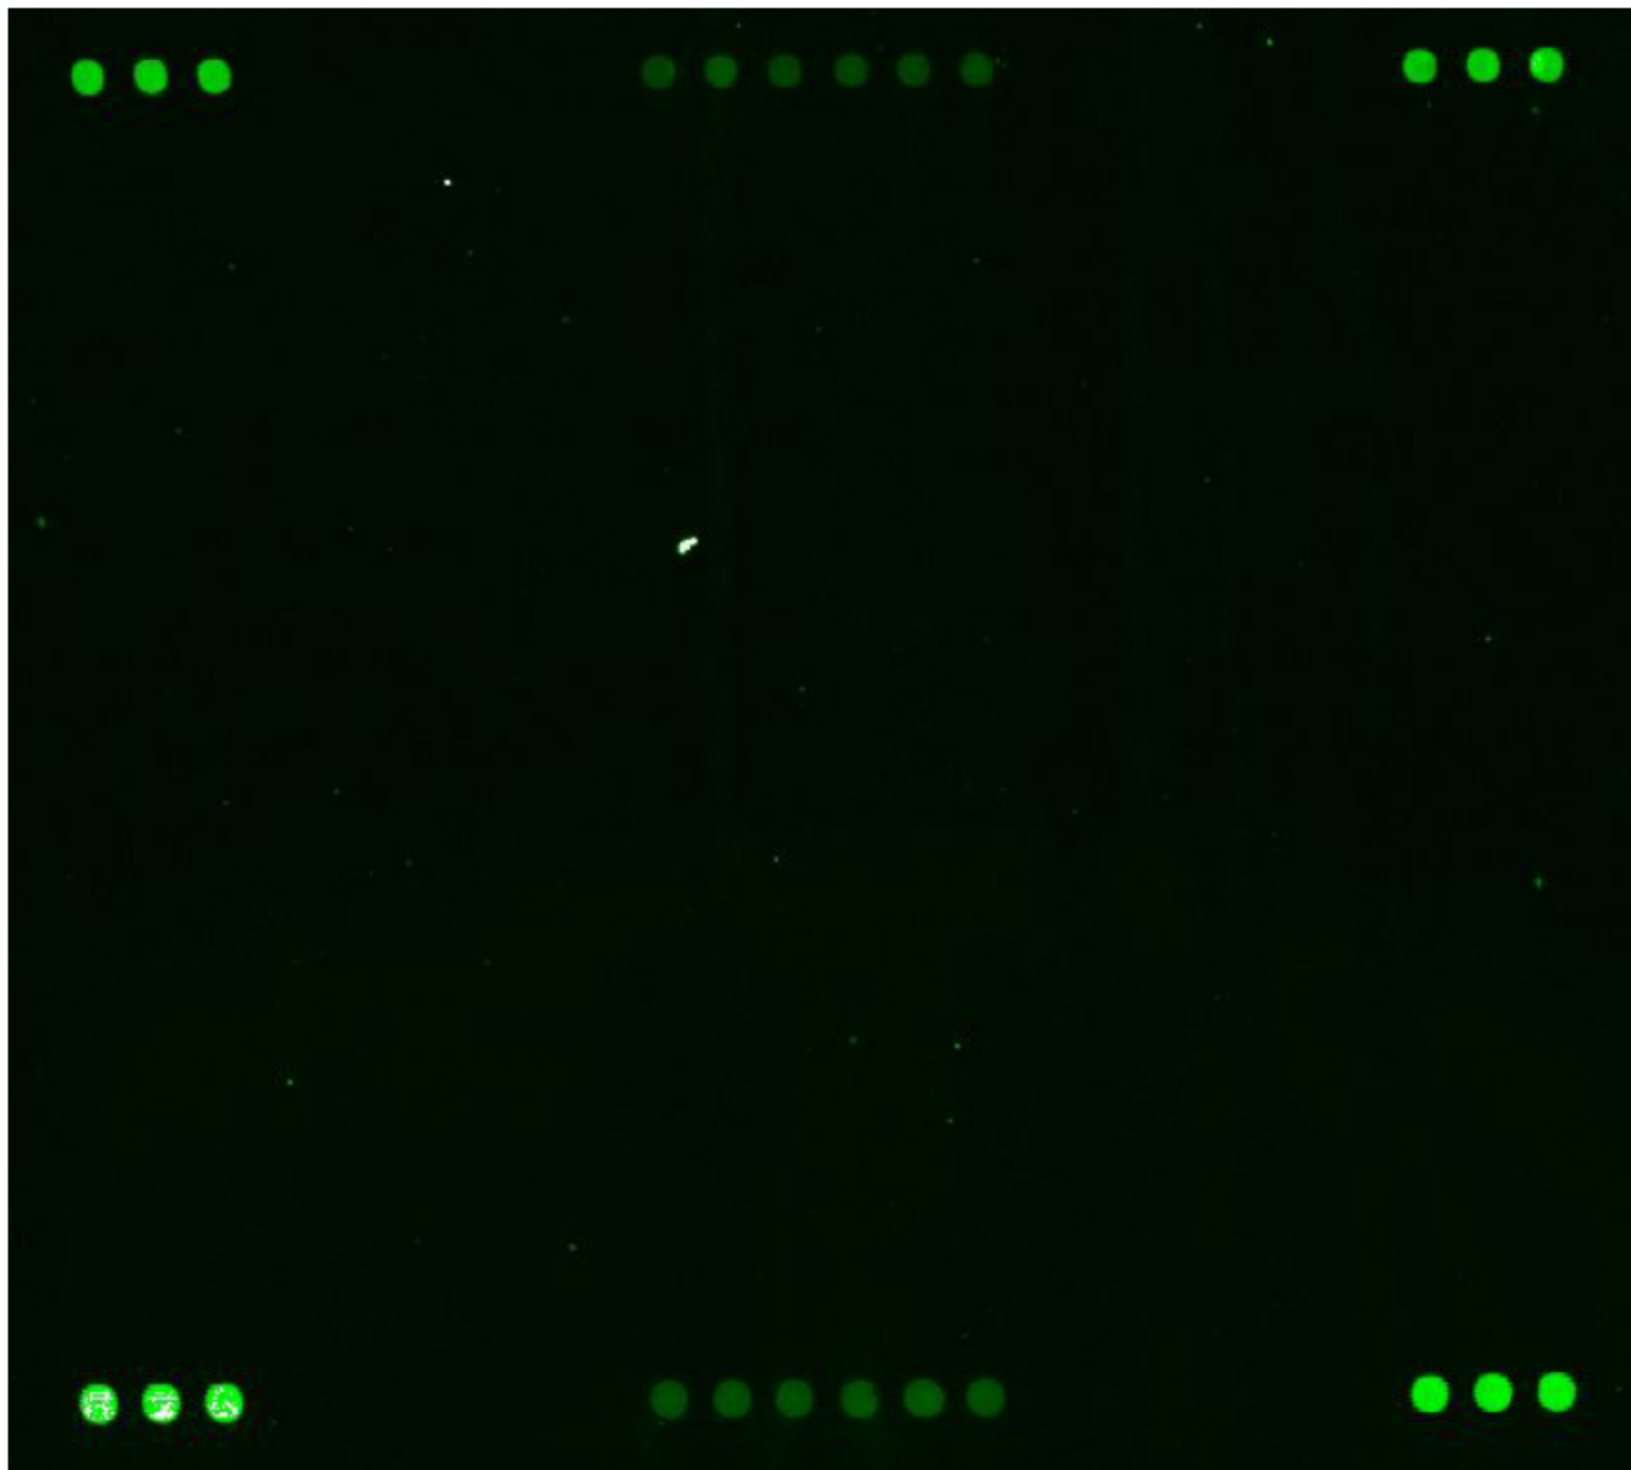

NC Specimen 15

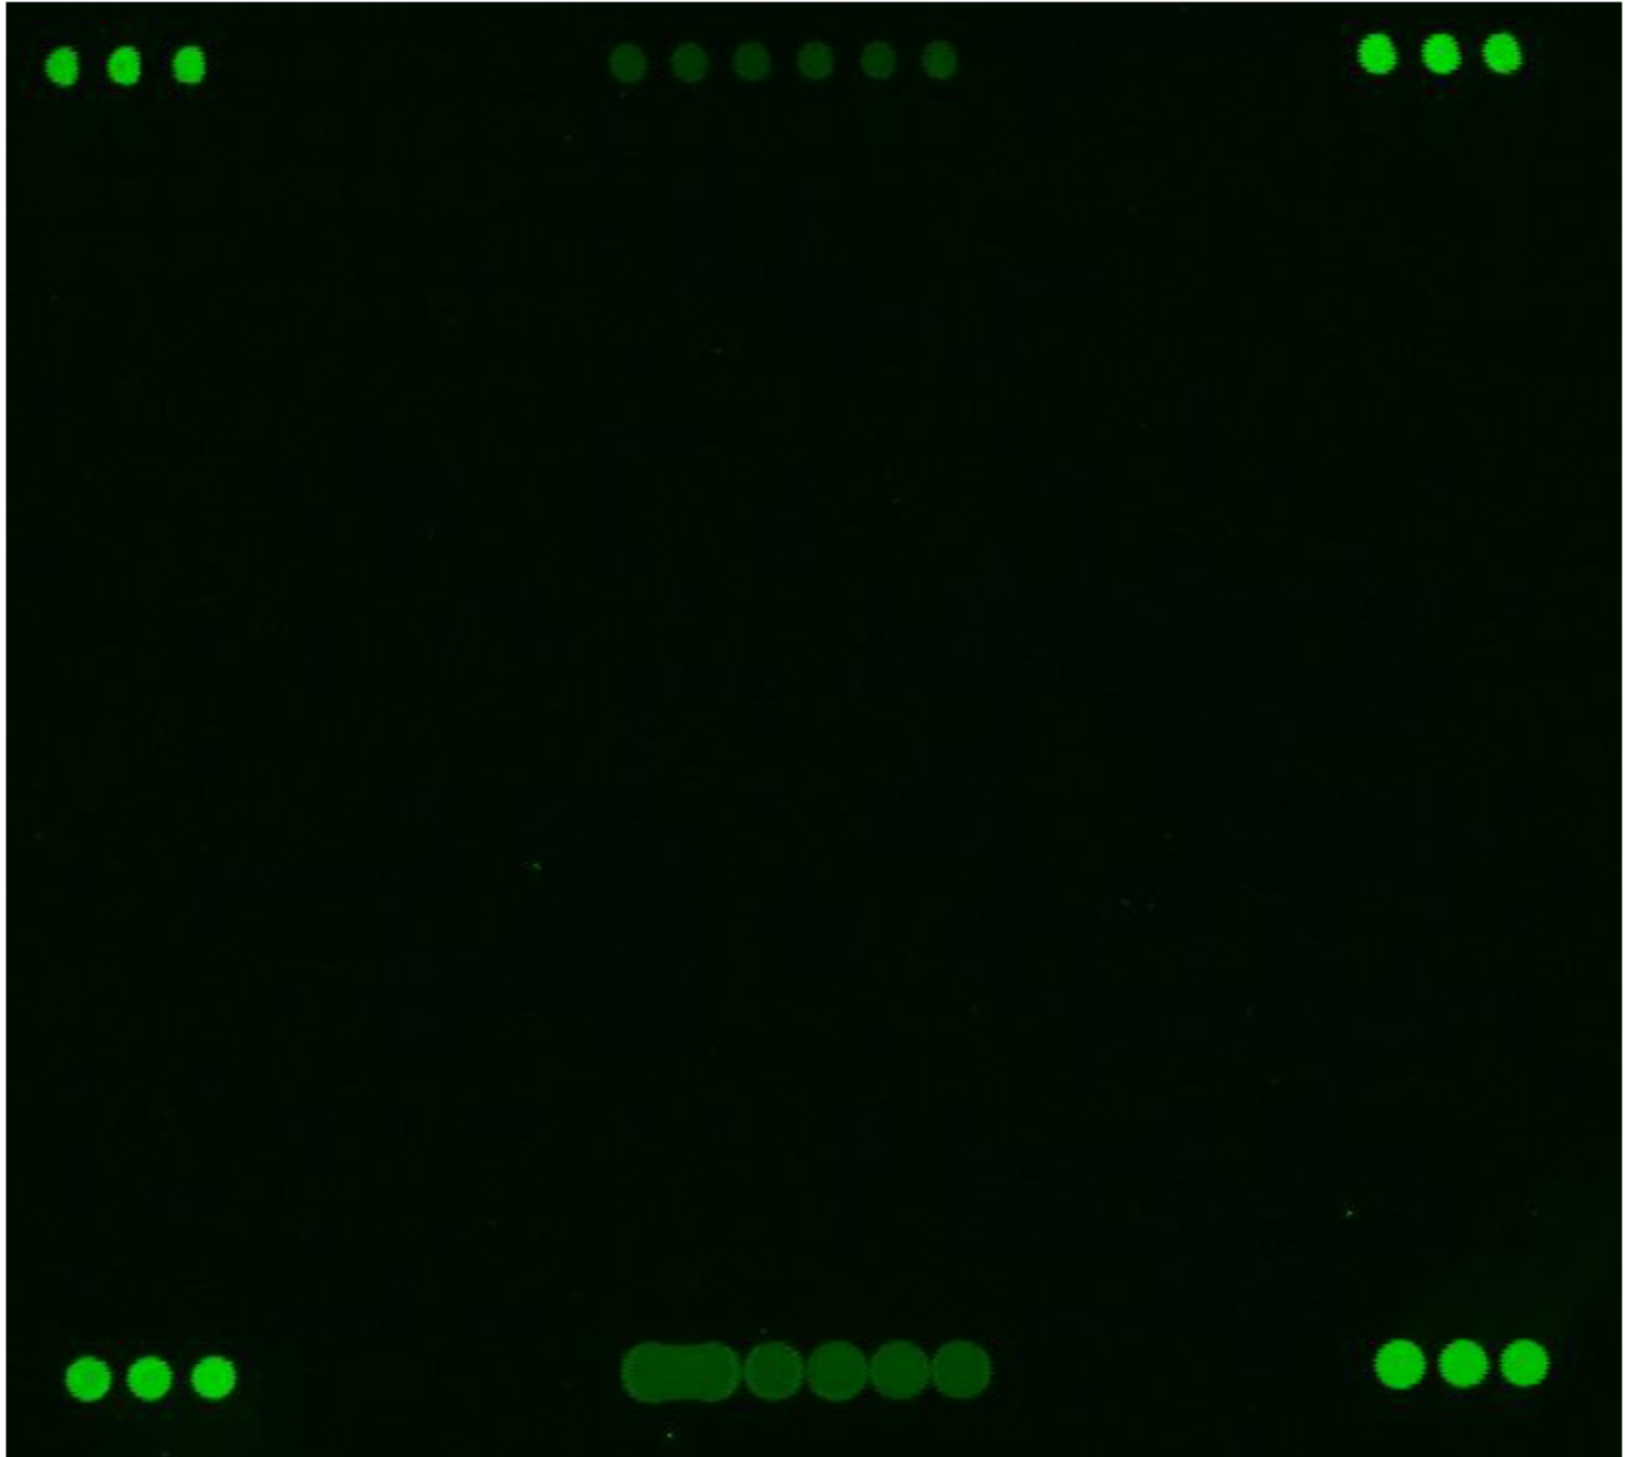

NC Specimen 16

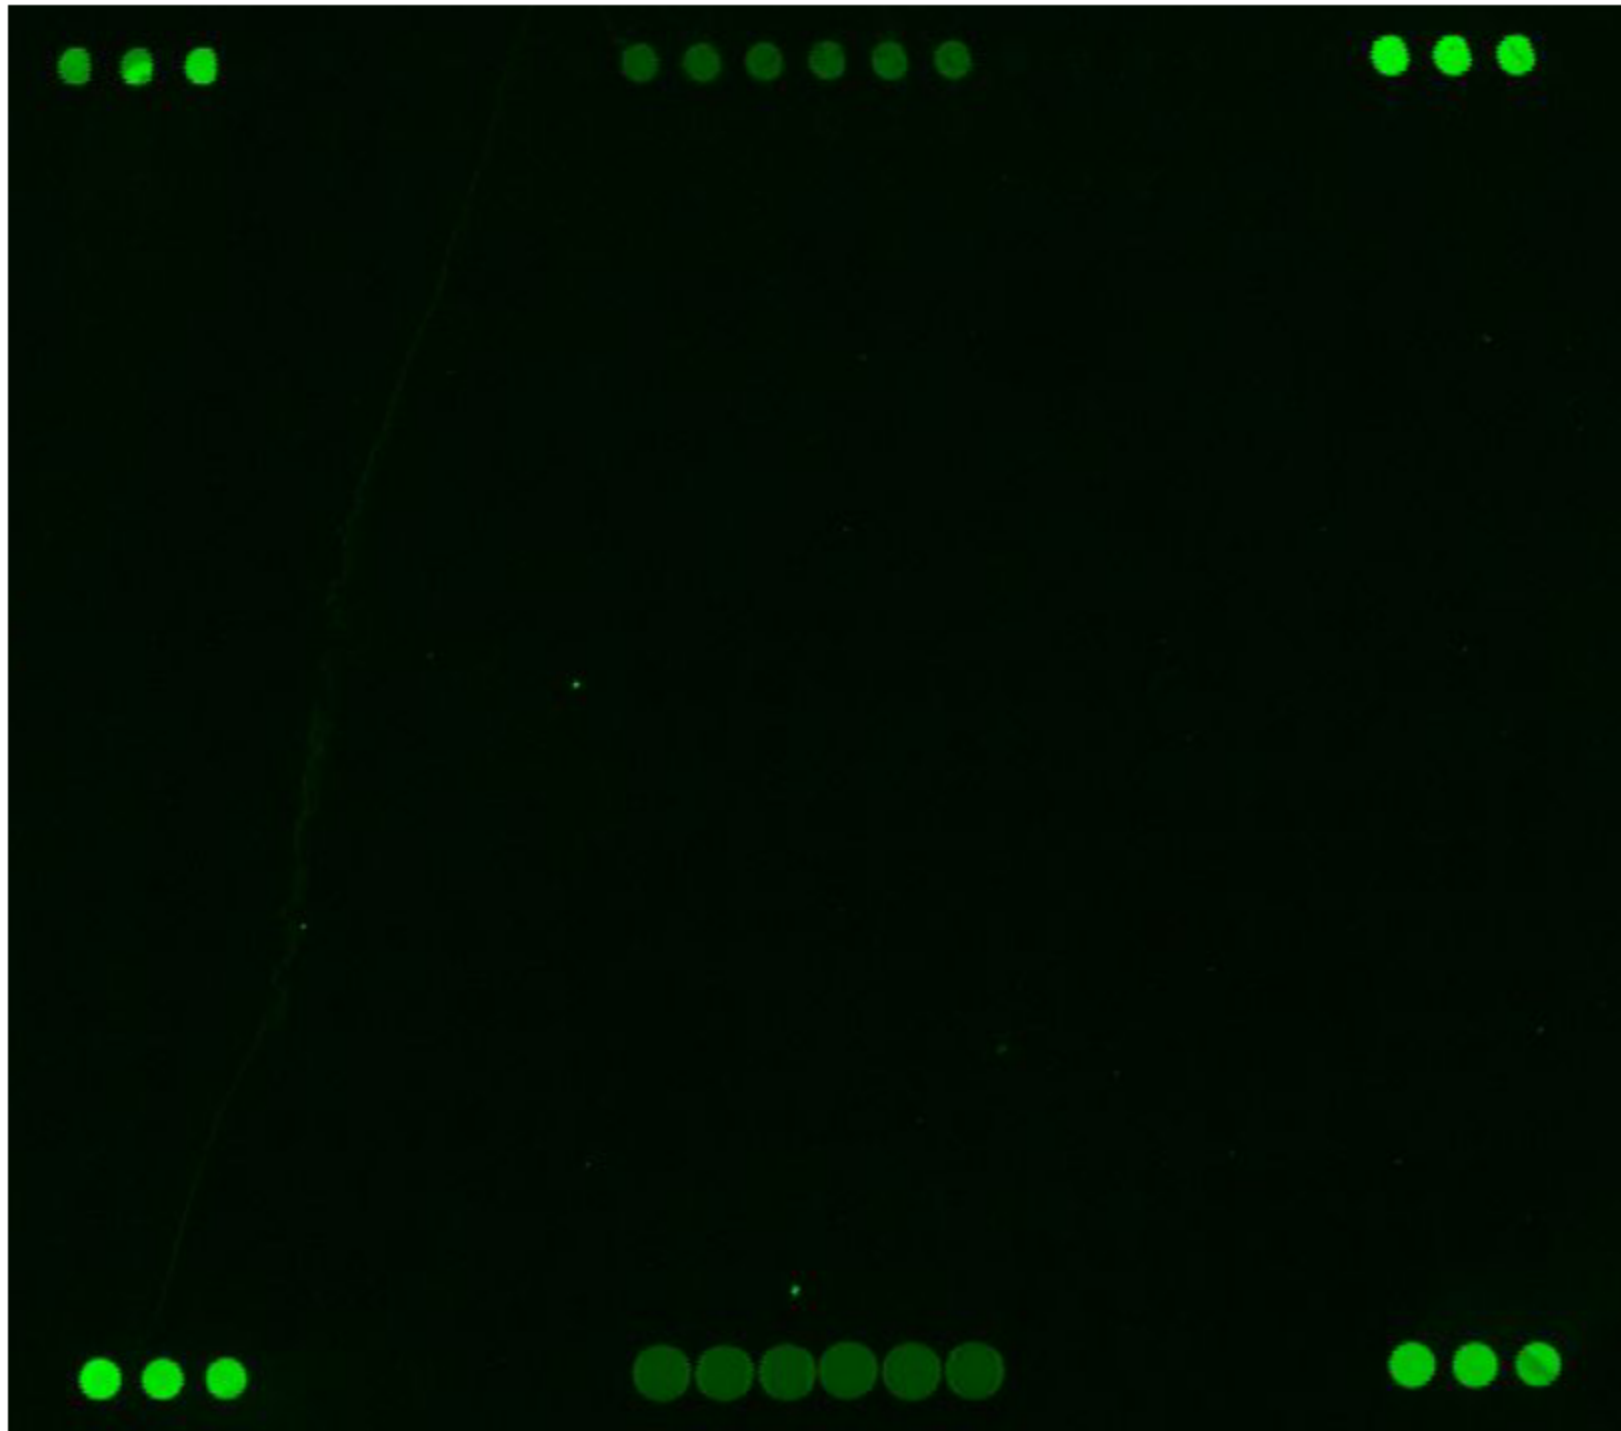

NC Specimen 17

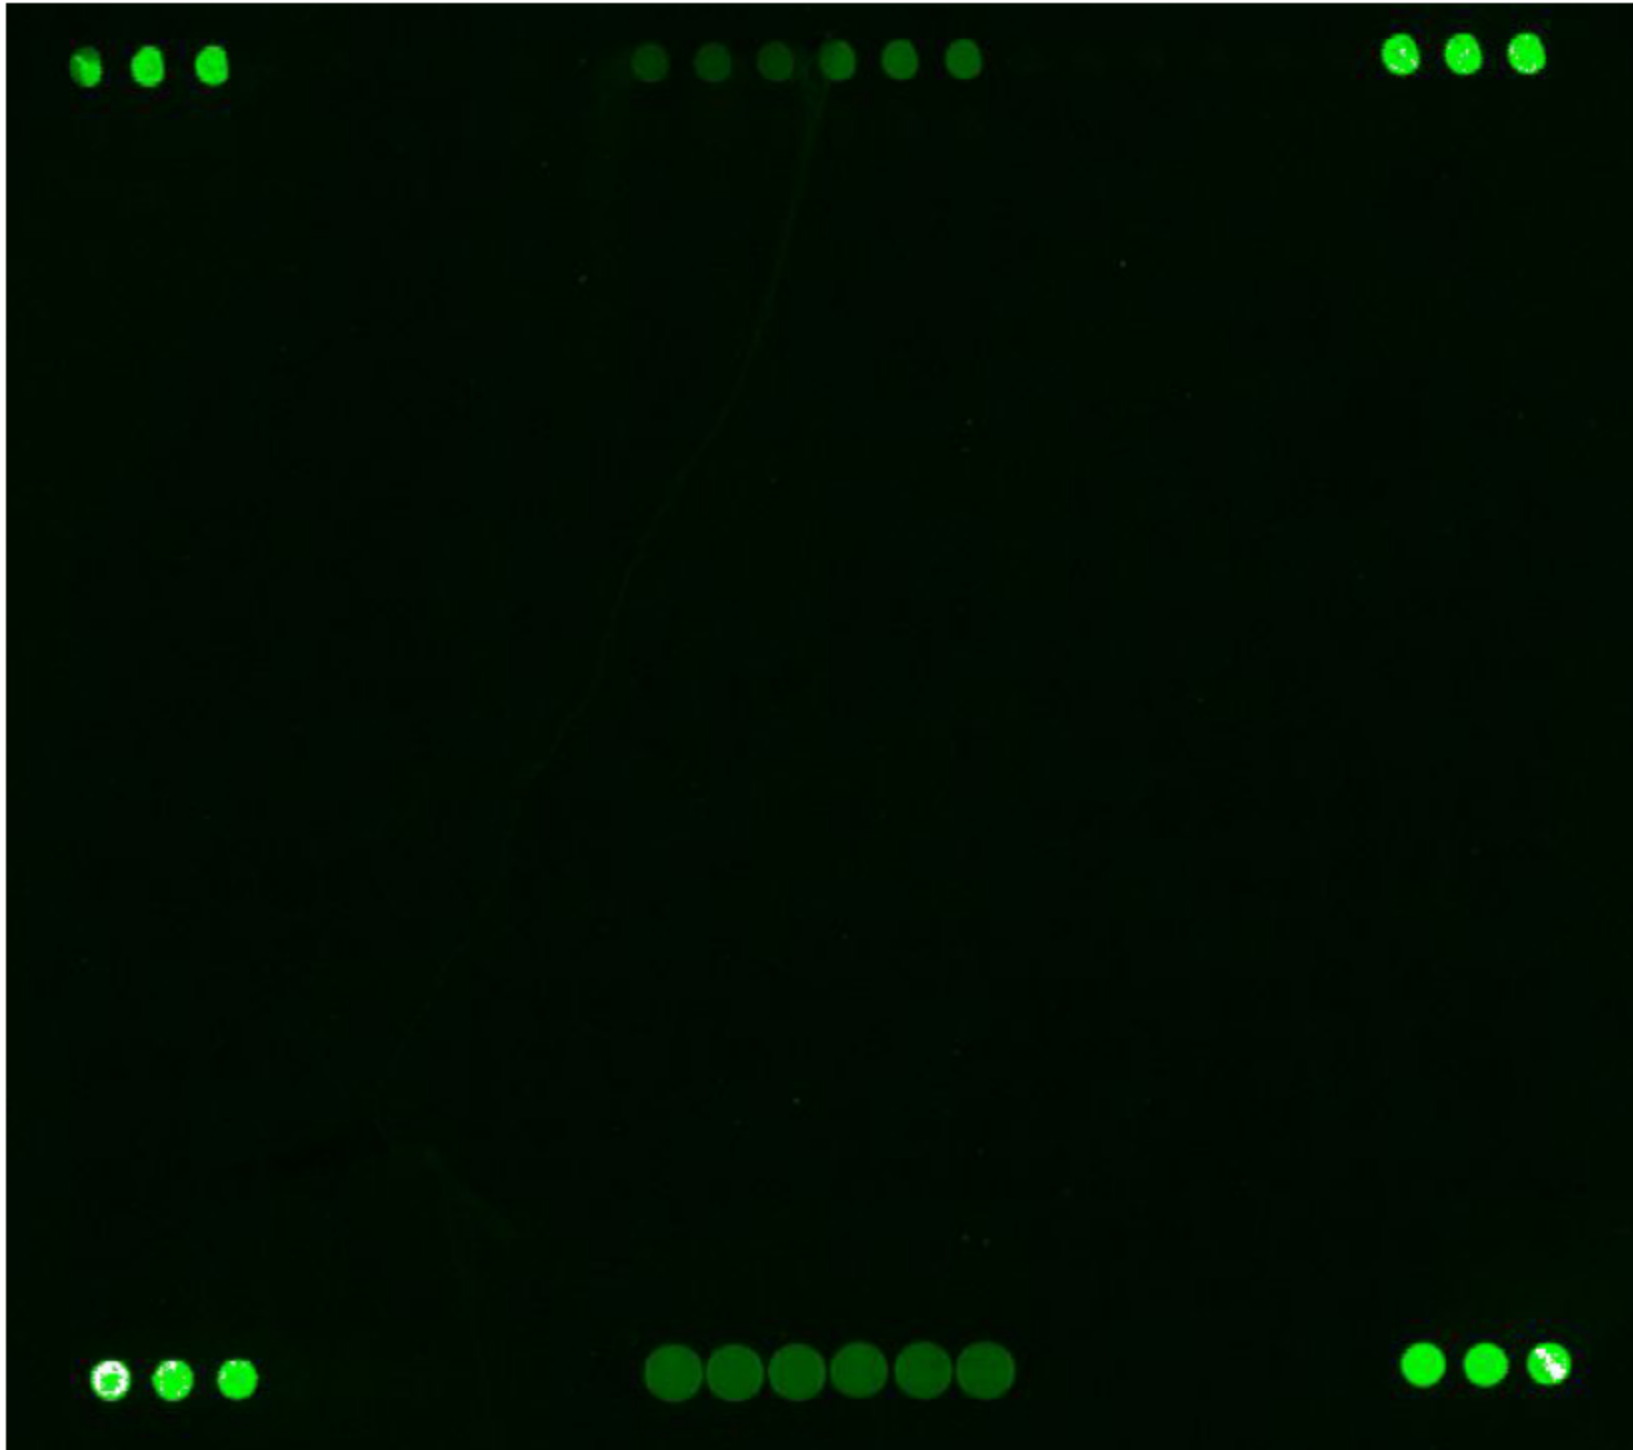

NC Specimen 18

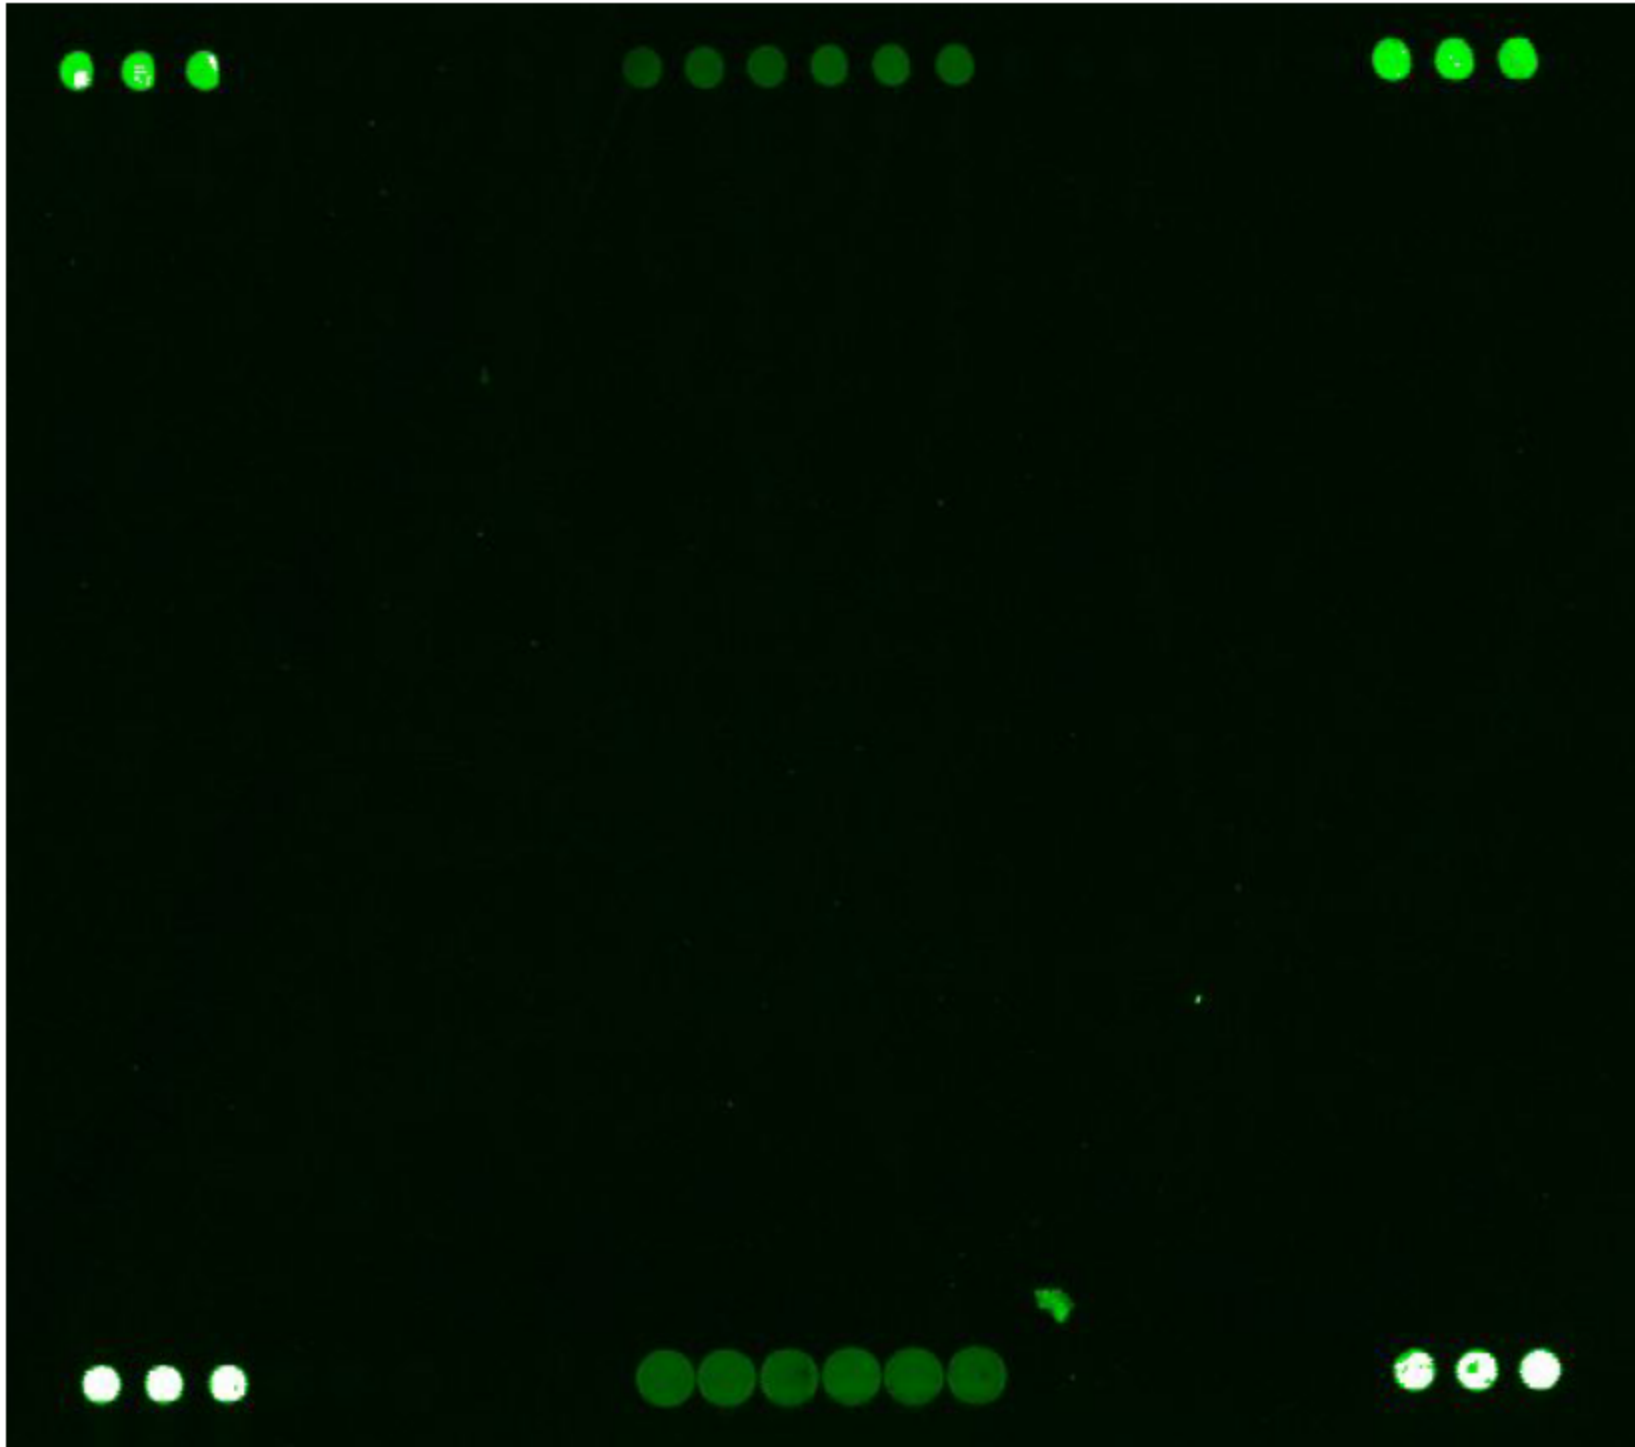

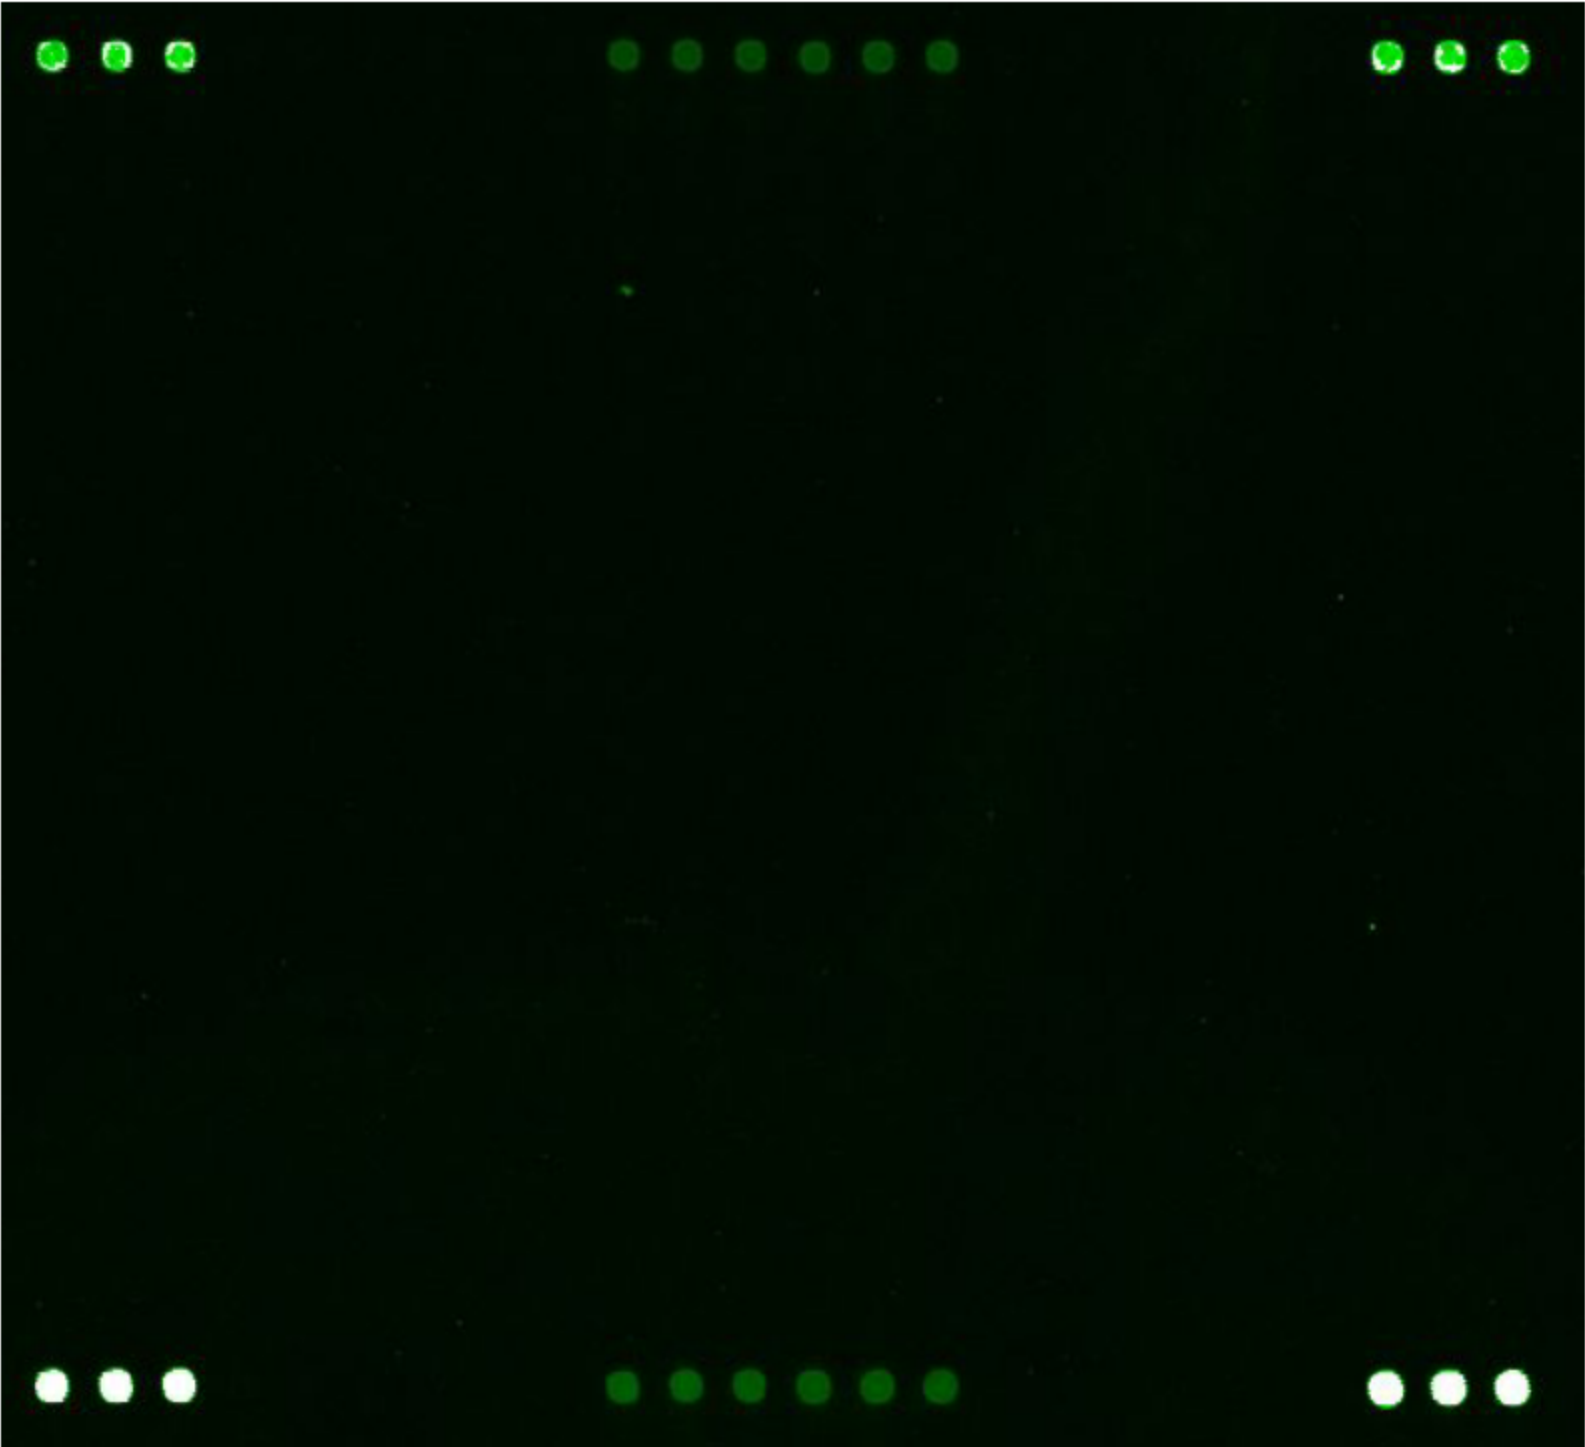

NC Specimen 20

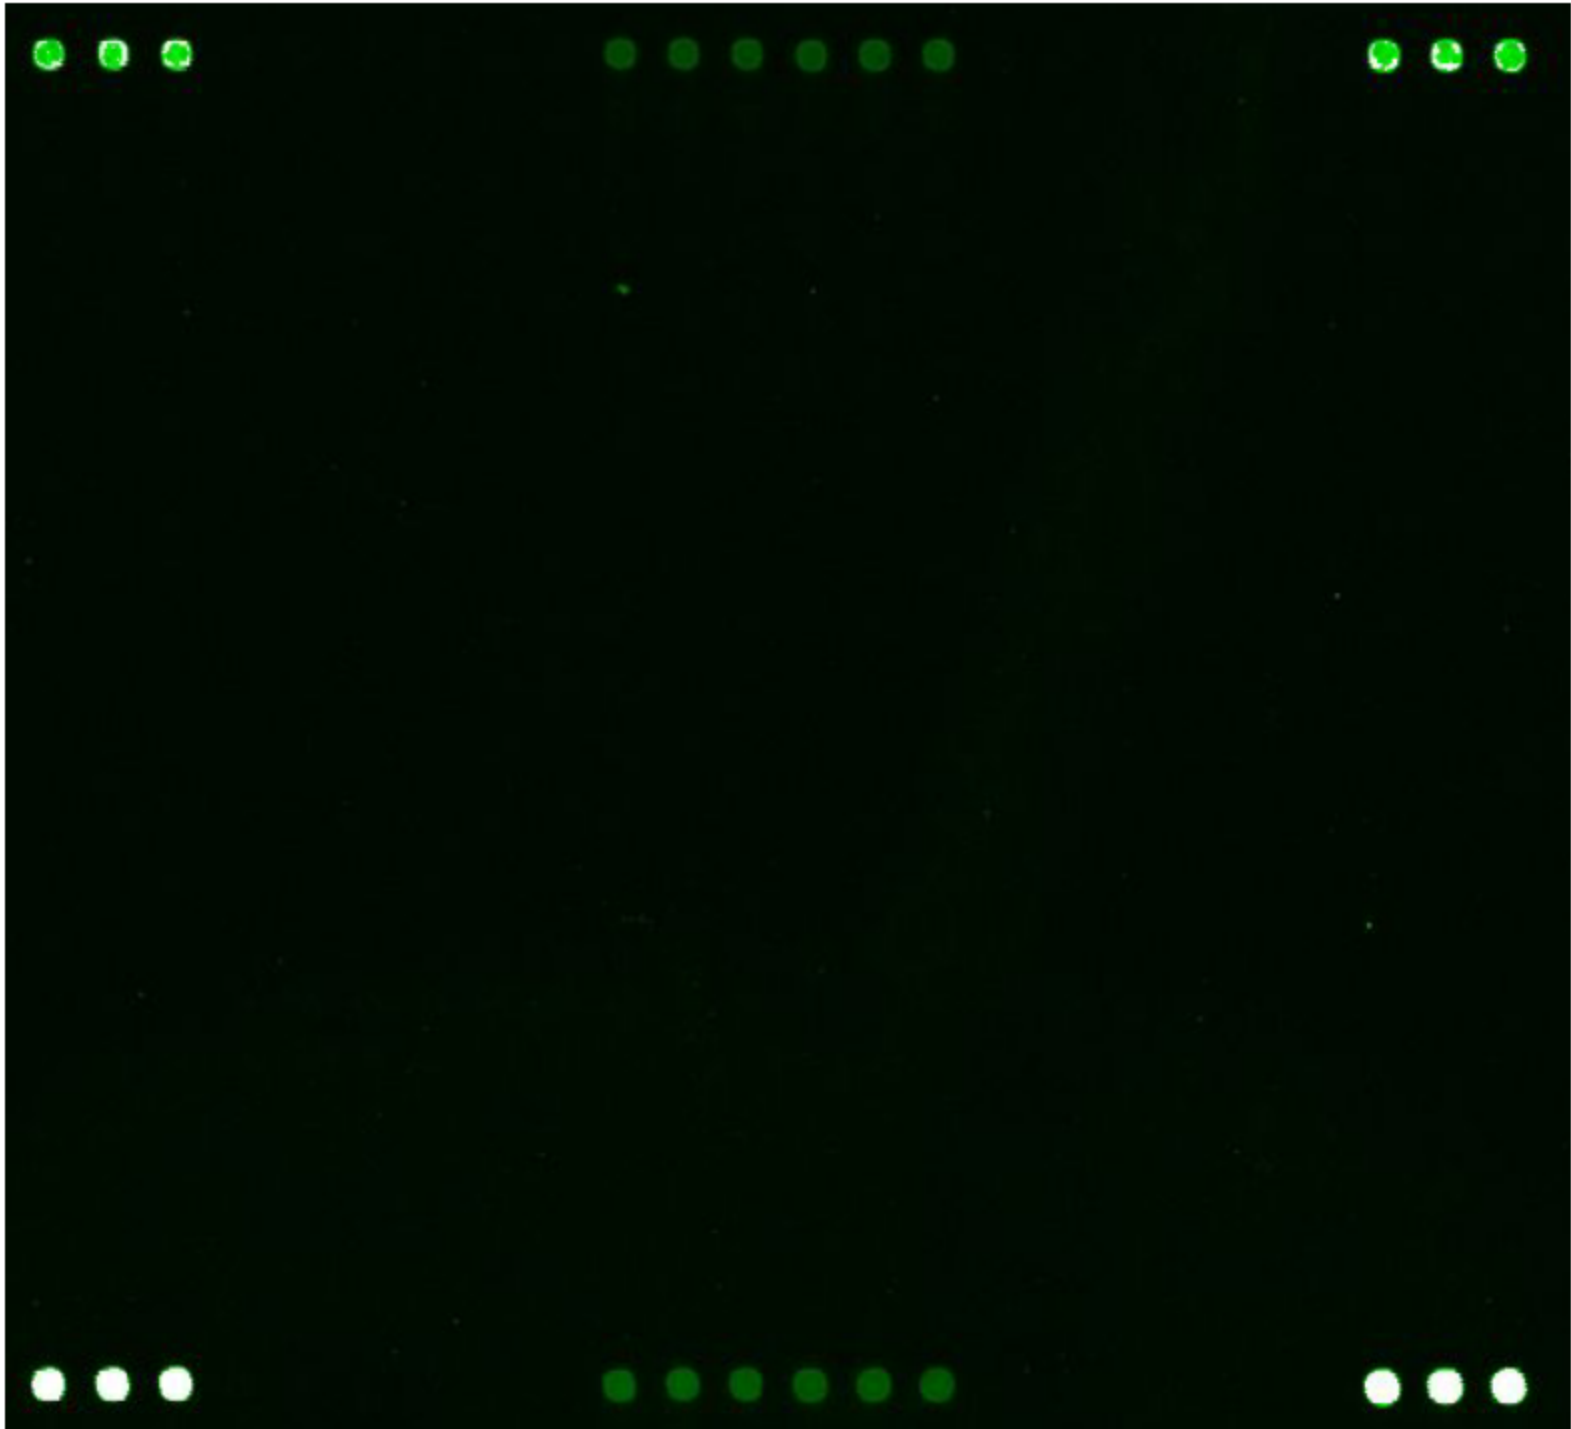



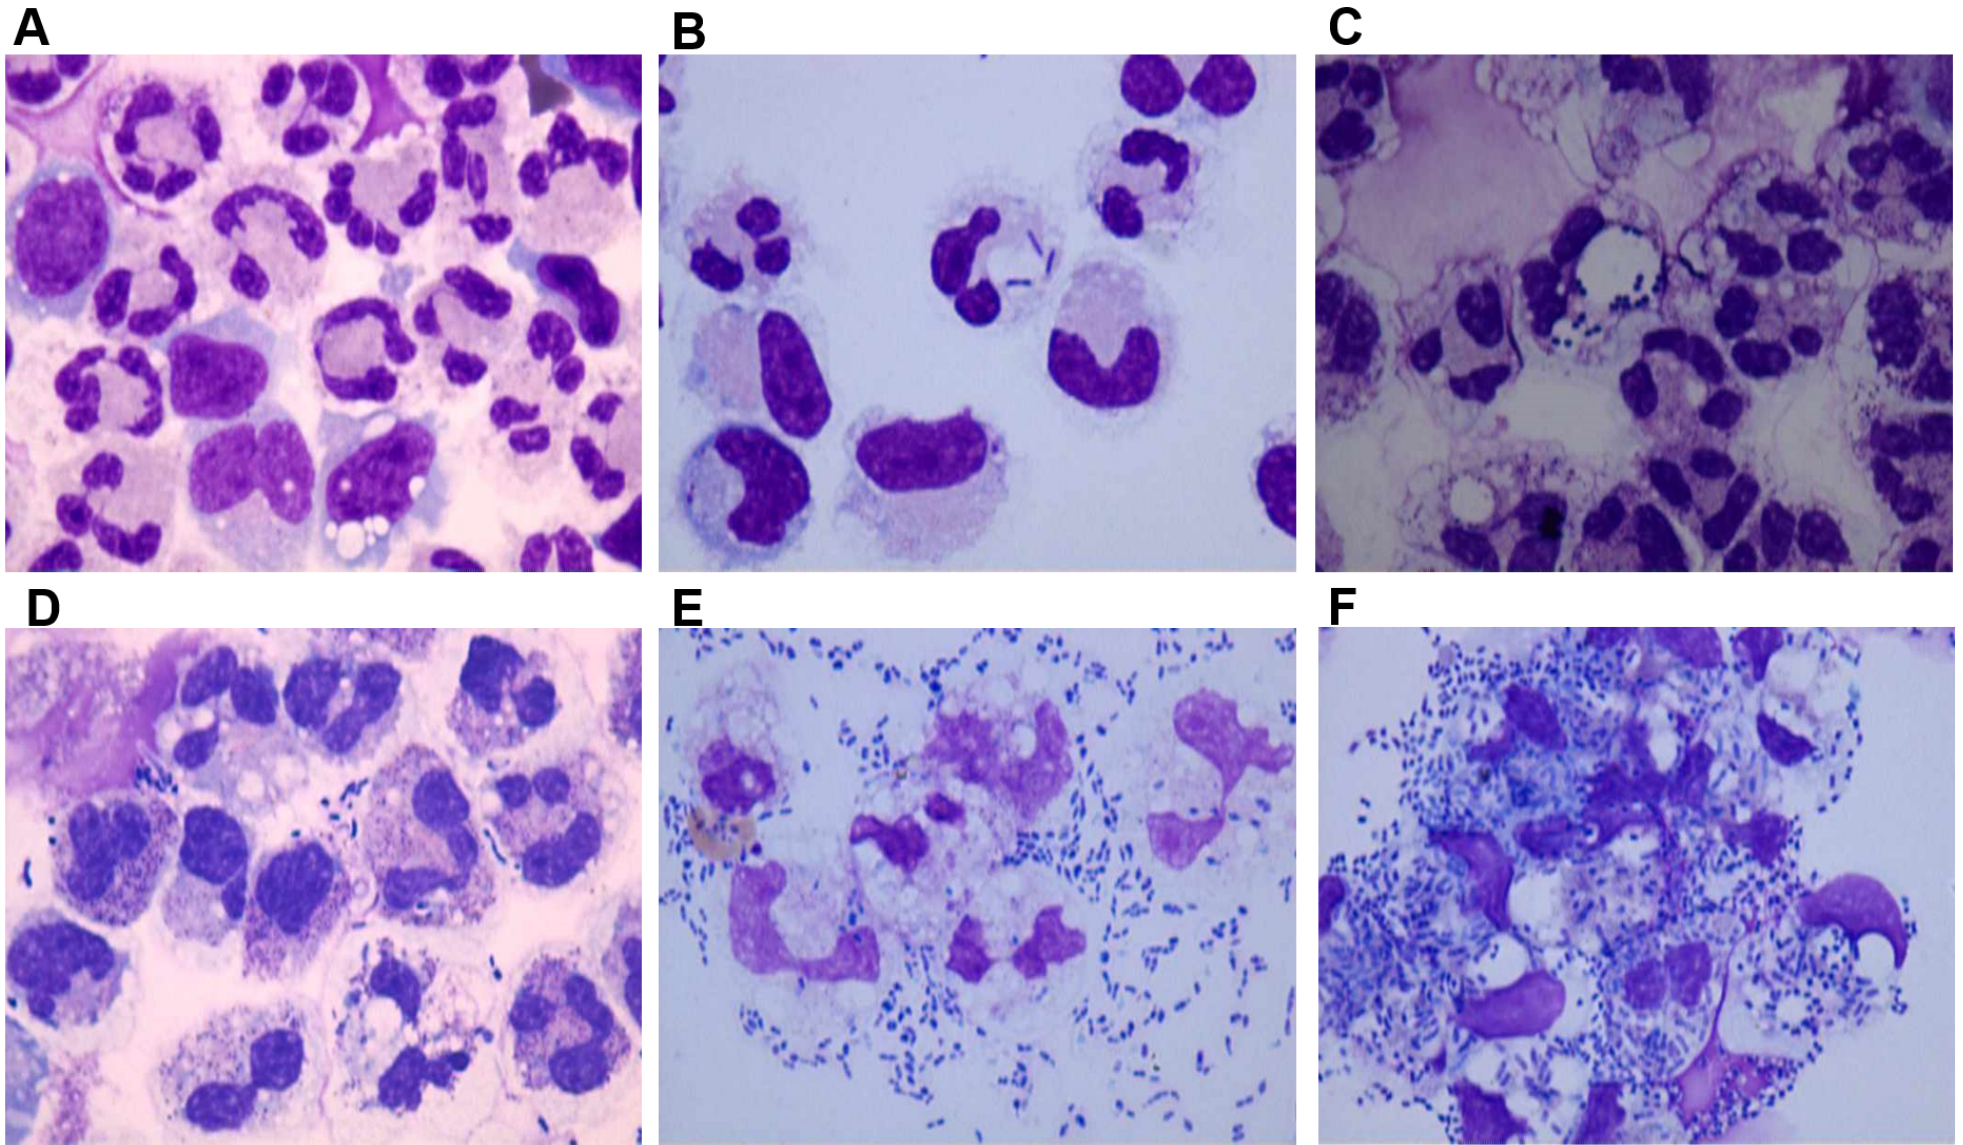

Figure S1. Cytological examination of CSF (1000 $\times$ ) A. Negative of infection; B. Neutrophils with intracellular bacterial infection(Bacillus) ;C. Neutrophils with intracellular bacterial infection(Coccus); D. Extracellular bacterial infection(Bacillus) ; E. Extracellular bacterial infection(Coccus); F. Extracellular and intracellular bacterial infection

Figure S2 Negative control specimens` microarray analysis results

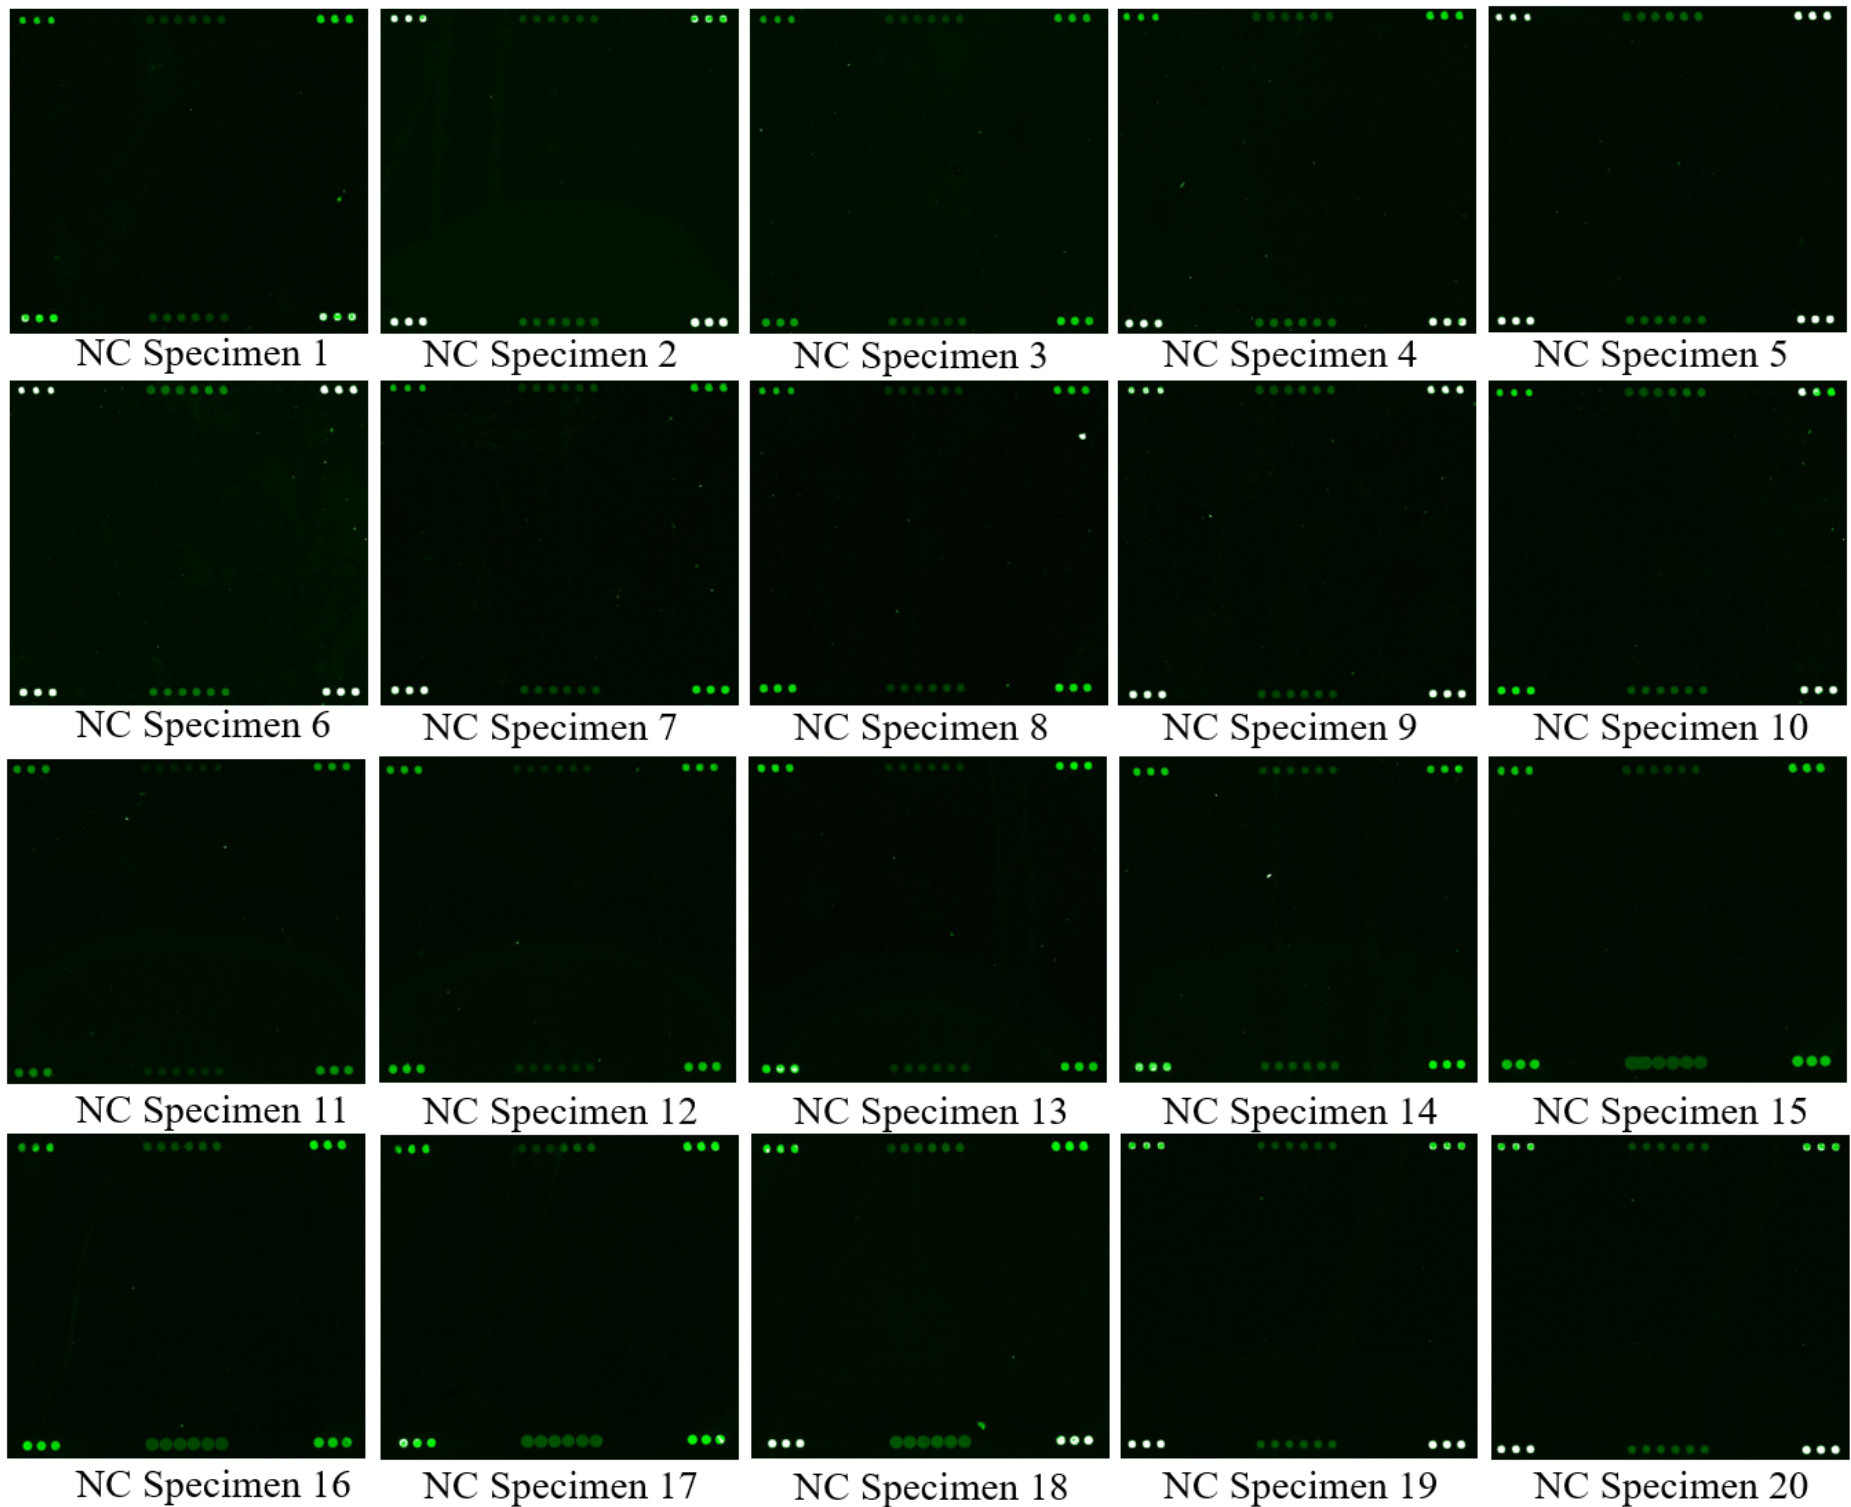

**Table S1. The results of negative control specimens` CSF culture testing, related clinical testing**

| Sample ID      | Age/sex (years) | Symptom                                             | The chemical analysis of CSF |              |             | CSF cytology examination |       |       |       | Bacteria | The results of CSF culture testing | The results of CSF microarray analysis | Diagnosis                       |
|----------------|-----------------|-----------------------------------------------------|------------------------------|--------------|-------------|--------------------------|-------|-------|-------|----------|------------------------------------|----------------------------------------|---------------------------------|
|                |                 |                                                     | Pro (g/L)                    | Glu (mmol/L) | Cl (mmol/L) | WBC (/mm <sup>3</sup> )  | L (%) | M (%) | N (%) |          |                                    |                                        |                                 |
| NC Specimen 1  | 45/F            | Bladder difficulties, Limbs numbness                | 0.63                         | 3.0          | 123         | 27                       | 92    | 6     | 4     | NO       | Negative                           | Negative                               | Neuromyelitis optica            |
| NC Specimen 2  | 32/M            | Limbs numbness                                      | 0.39                         | 2.7          | 128         | 2                        | -     | -     | -     | NO       | Negative                           | Negative                               | Neuromyelitis optica            |
| NC Specimen 3  | 16/F            | Headache, Tic                                       | 0.41                         | 3.2          | 125         | 37                       | 91    | 6     | 3     | NO       | Negative                           | Negative                               | Anti-NMDA receptor encephalitis |
| NC Specimen 4  | 23/M            | Headache, Tic, Unconsciousness                      | 0.41                         | 2.9          | 121         | 22                       | 90    | 4     | 6     | NO       | Negative                           | Negative                               | Anti-NMDA receptor encephalitis |
| NC Specimen 5  | 63/M            | Fever Unconsciousness                               | 0.66                         | 3.4          | 117         | 315                      | 38    | 21    | 41    | NO       | Negative                           | Negative                               | Epidemic encephalitis B         |
| NC Specimen 6  | 49/M            | Fever, Headache,                                    | 0.89                         | 2.7          | 121         | 25                       | 99    | 1     | -     | NO       | Negative                           | Negative                               | Epidemic encephalitis B         |
| NC Specimen 7  | 82/M            | Aphasia                                             | 0.90                         | 4.0          | 115         | 70                       | 80    | 18    | 2     | NO       | Negative                           | Negative                               | Cerebral infarction             |
| NC Specimen 8  | 52/F            | Headache,                                           | 0.33                         | 2.7          | 126         | 7                        | -     | -     | -     | NO       | Negative                           | Negative                               | Cerebral infarction             |
| NC Specimen 9  | 48/M            | Headache, Limbs weakness                            | 0.77                         | 3.1          | 125         | 10                       | 89    | 11    | -     | NO       | Negative                           | Negative                               | Cerebral infarction             |
| NC Specimen 10 | 31/F            | Weakness of the muscles of the face, Limbs numbness | 4.53                         | 2.6          | 119         | 10                       | 65    | 33    | 2     | NO       | Negative                           | Negative                               | Guillain-barre syndrome         |
| NC Specimen 11 | 67/M            | Problems with speech, Unconsciousness               | 0.78                         | 3.4          | 114         | 162                      | 81    | 17    | 2     | NO       | Negative                           | Negative                               | Guillain-barre syndrome         |
| NC Specimen 12 | 32/F            | Limbs numbness                                      | 0.44                         | 3.1          | 120         | 5                        | -     | -     | -     | NO       | Negative                           | Negative                               | Multiple sclerosis              |
| NC Specimen 13 | 30/F            | Blurred vision, Limbs numbness                      | 0.43                         | 4.9          | 124         | 12                       | 97    | 3     | -     | NO       | Negative                           | Negative                               | Multiple sclerosis              |

|                |      |                         |      |     |     |     |    |    |    |    |          |          |                                    |
|----------------|------|-------------------------|------|-----|-----|-----|----|----|----|----|----------|----------|------------------------------------|
| NC Specimen 14 | 24/F | Headache                | 0.88 | 1.7 | 121 | 67  | 96 | 4  | -  | NO | Negative | Negative | Viral meningitis                   |
| NC Specimen 15 | 34/F | Headache                | 1.01 | 2.3 | 125 | 222 | 97 | 3  | -  | NO | Negative | Negative | Viral meningitis                   |
| NC Specimen 16 | 34/F | Headache, Fever         | 0.56 | 1.9 | 124 | 127 | 88 | 12 | -  | NO | Negative | Negative | Viral meningitis                   |
| NC Specimen 17 | 29/M | Headache                | 0.98 | 2.5 | 122 | 177 | 92 | 8  | -  | NO | Negative | Negative | Viral meningitis                   |
| NC Specimen 18 | 8/M  | Headache,<br>Anemia     | -    | -   | -   | 2   | -  | -  | -  | NO | Negative | Negative | Acute lymphoblastic<br>leukemia    |
| NC Specimen 19 | 62/M | Fever, Feeling<br>tired | 0.66 | 2.9 | 122 | 10  | 25 | 3  | 69 | NO | Negative | Negative | Central nervous<br>system leukemia |
| NC Specimen 20 | 19/M | Blurred vision          | 0.49 | 2.5 | 122 | 87  | -  | -  | -  | NO | Negative | Negative | Central nervous<br>system leukemia |

**Notes:** CSF-cerebrospinal fluid; Pro-protein contents of cerebrospinal fluid; Glu-glucose contents of cerebrospinal fluid; Cl-chloride contents of cerebrospinal fluid; WBC-white blood cells of cerebrospinal fluid; L-lymphocyte count of cerebrospinal fluid; M-monocyte count of cerebrospinal fluid; N-neutrophils count of cerebrospinal fluid.
